# Supplementary material for: The growth of faults and fracture networks in a mechanically evolving, mechanically stratified rock mass: a case study from Spireslack Surface Coal Mine, Scotland
Source: Copernicus journal article supplement (doi:10.5194/se-11-2119-2020), 2020-11-18
Supplement: Supplementary file 1 [file Sup 2_Dip slope topology.xlsx]

## Sheet: Topology summary
			Basic parameters				Topology parameters							cencored		tl				orientation
			#fr	#br	Area	Total tl	i	y	x	E	I-I	I-C	C-C	Cb	% cb	min	max	median	QCV	Mode (5°)	Mean	Median	2D intensity	Pc
	SA1	SA1_full	784	3003	500.37	1539.67	22	1384	413	153	0	21	2816	12	0.004212	0.092575	14.7116	1.12024	1.43916	47.5	-	-	3.07707	0.996224
		Int6_set0_30-50	133	1166	500.37	665.007	-	-	-	-	0	2	1164	5	0.00426985	0.092575	14.7116	3.96491	1.19981	47.5	41.7	42.67	1.32903	-
		Int6_set1	72	267	500.37	112.514	-	-	-	-	0	4	263	1	0.00373134	0.101956	9.80327	1.0226	1.50283	52.5	79	81.05	0.224862	-
		Int6_set2	415	897	500.37	517.895	-	-	-	-	0	12	885	5	0.00554324	0.124663	7.43639	0.914797	0.938809	142.5	134.7	133.09	1.03502	-
		Int6_set3	164	507	500.37	244.255	-	-	-	-	0	3	504	1	0.0019685	0.095518	9.32802	1.06332	1.19438	2.5	175.1	152.285	0.488148	-
		Int6_fault	102	103	500.37	224.188	169	18	0	17	59	39	5	17	0.141667	0.217397	9.32802	1.62012	1.086	2.5	-	114.52	0.448045	0.242152
		Int6_set0_30-50	1	0	500.37	3.82171	-	-	-	-	0	0	0	2	1	3.82171	3.82171	3.82171	#NUM!	32.5	33.7	33.66	0.00763776	-
		Int6_set1	0	3	500.37	0	-	-	-	-	-	2	1	0	0	-	-	-	-	-	-	-	-	-
		Int6_set2	15	18	500.37	37.228	-	-	-	-	5	10	3	1	0.0526316	0.732087	7.43639	1.37113	1.28216	147.5	140.3	138.9	0.074401	-
		Int6_set3	86	82	500.37	183.139	-	-	-	-	54	27	1	14	0.145833	0.217397	9.32802	1.62012	1.05702	2.5	179	21.96	0.366006	-
		Int6_Fract	682	2134	500.37	1315.48	212	1028	274	124	6	193	1935	122	0.054078	0.092575	14.7116	1.02823	1.53402	47.5	-	-	2.62902	0.95173
		Int6_set0_30-50	132	977	500.37	661.186	-	-	-	-	1	58	918	58	0.0560386	0.092575	14.7116	4.02372	1.17558	47.5	41.8	42.74	1.32139	-
		Int6_set1	72	210	500.37	112.514	-	-	-	-	2	31	177	8	0.0366972	0.101956	9.80327	1.0226	1.50283	52.5	49	81.05	0.224862	-
		Int6_set2	400	785	500.37	480.667	-	-	-	-	2	88	695	45	0.0542169	0.124663	7.32972	0.893615	0.949852	142.5	134.3	132.93	0.960624	-
		Int6_set3	78	162	500.37	61.1161	-	-	-	-	1	16	145	11	0.0635838	0.095518	3.45027	0.564237	1.05143	152.5	163	153.33	0.122142	-
	SA2	Int5_full	2258	7059	840.451	2959.58	198	4096	354	211	2	190	6654	213	0.0301742	0.015143	13.1561	0.898765	1.16138	37.5	-	-	3.52142	0.985757
		Int5_set0	789	2927	840.451	1424.64	-	-	-	-	0	80	2747	100	0.0341647	0.015143	10.3334	1.31794	1.13993	37.5	39.8	40.05	1.69509	-
		Int5_set1	174	554	840.451	153.41	-	-	-	-	0	7	540	7	0.0126354	0.102911	4.18342	0.703254	1.12302	52.5	38.4	71.615	0.182533	-
		Int5_set2	636	1747	840.451	783.42	-	-	-	-	2	63	1633	49	0.0280481	0.094765	13.1561	0.864875	0.909203	112.5	111.2	112.255	0.932143	-
		Int5_set3	454	1116	840.451	430.33	-	-	-	-	0	24	1049	43	0.0385305	0.093387	8.65808	0.663172	1.01763	125.5	127.7	126.955	0.512023	-
		Int5_set4	205	715	840.451	167.77	-	-	-	-	0	16	685	14	0.0195804	0.09391	4.14072	0.628028	1.12673	142.5	172.7	140.87	0.199619	-
		Int5_fault	132	167	840.451	378.687	264	34	0	34	62	56	18	31	0.185629	0.214446	13.1561	2.34033	1.17528	102.5	-	115.86	0.450576	0.278689
		Int5_set0	-	15	840.451	6.26	-	-	-	-	-	-	-	-	-	-	-	-	-	-	-	-		-
		Int5_set1	3	3	840.451	3.44974	-	-	-	-	2	1	0	0	0	0.903313	1.38224	1.16419	0.411383	97.5	98.9	98.85	0.00410463	-
		Int5_set2	24	586	840.451	226.653	-	-	-	-	37	29	12	18	0.1875	0.473286	13.1561	2.42735	1.23077	107.5	109	110.21	0.26968	-
		Int5_set3	53	515	840.451	128.015	-	-	-	-	19	16	6	12	0.226415	0.779301	8.65808	2.53289	1.03615	122.5	129.6	130.195	0.152317	-
		Int5_set4	19	184	840.451	20.5697	-	-	-	-	6	12	2	0	0	0.214446	3.16033	1.74478	0.826459	152.5	153.1	154.03	0.0244746	-
		Int5_fract	2126	5702	840.451	2580.89	1082	2985	297	177	69	927	4527	179	0.0313925	0.015143	10.3334	0.857613	1.11801	37.5	-	101.775	3.07084	0.903608
		Int5_set0	789	2756	840.451	1424.64	-	-	-	-	48	612	1997	99	0.0359216	0.015143	10.3334	1.31794	1.13993	37.5	39.8	40.05	1.69509	-
		Int5_set1	171	485	840.451	149.962	-	-	-	-	7	78	393	7	0.014433	0.102911	4.18342	0.701394	1.12995	40.7	52.5	70.3	0.17843	-
		Int5_set2	561	1132	840.451	556.767	-	-	-	-	1	74	1025	32	0.0282686	0.094765	6.92631	0.788702	0.772448	112.5	112	112.58	0.662462	-
		Int5_set3	412	755	840.451	302.318	-	-	-	-	1	45	680	29	0.0384106	0.093387	4.44376	0.588928	0.893881	122.5	127	126.805	0.359709	-
		Int5_set4	193	574	840.451	147.201	-	-	-	-	12	118	432	12	0.0209059	0.09391	4.14072	0.590118	1.16342	27.5	175.7	140.18	0.175146	-
	SA3	Int4_full	5562	16994	753.727	4412.73	208	10266	607	394	3	200	16319	472	0.0277745	0.04436	15.3342	0.514114	1.30629	47.5	-	103.05	5.85454	0.993779
		Int4_set0	2008	6340	753.727	1785.36	-	-	-	-	2	67	6142	129	0.020347	0.04436	5.48804	0.736976	1.02036	47.5	48.1	48.165	2.36871	-
		Int4_set1	509	1307	753.727	288.975	-	-	-	-	0	18	1250	39	0.0298393	0.056938	6.67913	0.414331	1.17983	62.5	51	77.17	0.383395	-
		Int4_set2	1244	3620	753.727	1008.63	-	-	-	-	0	51	3471	98	0.0270718	0.046747	9.38125	0.486382	1.18597	112.5	112.9	113.35	1.33818	-
		Int4_set3	1353	4334	753.727	1065.41	-	-	-	-	1	41	4154	137	0.0316178	0.054195	15.3342	0.41721	1.10234	147.5	141	138.8	1.41352	-
		Int4_set4	448	1393	753.727	264.353	-	-	-	-	0	23	1302	68	0.0488155	0.049204	8.15238	0.364445	1.17949	157.5	172.7	157.01	0.350727	-
		Int4_fault	782	1374	753.727	1452.3	729	593	6	172	128	438	622	186	0.135371	0.096807	15.3342	1.3606	1.00661	147.5	-	123.38	1.92682	0.712085
		Int4_set0	7	15	753.727	8.54281	-	-	-	-	0	0	12	3	0.2	0.348031	2.81356	0.945565	1.39838	47.5	48	47.65	0.0113341	-
		Int4_set1	45	81	753.727	61.2282	-	-	-	-	6	23	31	21	0.259259	0.299142	6.67913	1.08509	0.825703	97.5	112	93.31	0.0812339	-
		Int4_set2	341	586	753.727	614.385	-	-	-	-	72	197	255	62	0.105802	0.096807	9.38125	1.42133	0.944684	112.5	112	112.67	0.815129	-
		Int4_set3	296	512	753.727	630.624	-	-	-	-	39	176	231	56	0.111554	0.193724	15.3342	1.40311	1.10155	147.5	143	140.715	0.836674	-
		Int4_set4	93	180	753.727	137.516	-	-	-	-	11	42	93	34	0.188889	0.212611	8.15238	1.10686	0.916665	157.5	167.4	160.05	0.182448	-
		Int4_fract	4778	10055	753.727	2958.99	4517	4726	291	234	452	3569	5796	238	0.0236698	0.04436	5.48804	0.456735	1.11384		-	74.065	3.92581	0.772546
		Int4_set0	2000	5518	753.727	1775.85	-	-	-	-	322	2508	2562	126	0.0228344	0.04436	5.48804	0.736711	1.02133	47.5	48.1	48.165	2.35609	-
		Int4_set1	464	968	753.727	227.747	-	-	-	-	82	389	485	12	0.0123967	0.056938	2.97121	0.390927	1.00377	62.5	60.5	75.115	0.302161	-
		Int4_set2	903	1374	753.727	394.241	-	-	-	-	3	221	1118	30	0.0218659	0.046747	2.86196	0.381482	0.797956	112.5	113.2	113.86	0.523055	-
		Int4_set3	1056	1549	753.727	434.321	-	-	-	-	10	221	1272	46	0.0296966	0.054195	3.09166	0.346813	0.771146	137.5	138.9	138.215	0.576231	-
		Int4_set4	355	646	753.727	126.837	-	-	-	-	35	230	359	22	0.0340557	0.049204	1.90106	0.282314	1.1108	157.5	178.7	155.88	0.16828	-

## Sheet: Tl
		Map 1												Map 2															Map 3
		Full network				Fault network				Fracture network				Full network					Fault network					Fracture network					Full network					Fault network					Fracture network
	Bin	Set 0	Set1	Set2	Set3	Set 0	Set1	Set2	Set3	Set 0	Set1	Set2	Set3	Set 0	Set1	Set2	Set3	Set4	Set 0	Set1	Set2	Set3	Set4	Set 0	Set1	Set2	Set3	Set4	Set 0	Set1	Set2	Set3	Set4	Set 0	Set1	Set2	Set3	Set4	Set 0	Set1	Set2	Set3	Set4
	0	3.82171	0.148452	2.2212	9.32802	3.82171	-	2.2212	9.32802	3.55321	0.148452	0.933084	0.308727	0.497098	1.38224	3.68503	5.64907	0.214446		1.38224	3.68503	5.64907	0.214446	0.497098	2.08717	5.35316	0.529975	0.487964	0.597049	1.84328	3.9763	14.8974	1.72931	0.597049	1.84328	3.9763	14.8974	1.72931	1.72378	0.147977	0.362734	0.594974	0.145404
	0.5	3.55321	2.86238	2.79799	1.55899			2.79799	1.55899	3.33971	2.86238	0.183382	0.66451	0.477875	1.16419	1.69251	2.61441	0.763599		1.16419	1.69251	2.61441	0.763599	0.477875	2.41563	0.502429	1.91577	0.140605	0.348031	0.989522	5.37043	1.54649	4.0837	0.348031	0.989522	5.37043	1.54649	4.0837	1.29904	0.18465	0.48752	0.240806	0.412288
	1	3.33971	1.19078	7.43639	0.603276			7.43639	0.603276	3.19493	1.19078	0.358542	2.19139	0.708864	0.903313	2.31257	3.05081	1.60335		0.903313	2.31257	3.05081	1.60335	0.708864	0.83381	2.15269	2.39306	0.133617	0.945565	0.800209	1.45116	0.934316	4.92202	0.945565	0.800209	1.45116	0.934316	4.92202	1.16545	0.328147	0.830245	0.590666	0.345808
	1.5	3.19493	1.09457	7.06272	3.83853			7.06272	3.83853	7.69565	1.09457	0.286274	0.413954	0.794496	2.08717	5.06423	1.36835	2.42019			5.06423	1.36835	2.42019	0.794496	0.361194	2.67306	0.184835	0.934039	2.81356	2.02071	0.711134	1.88196	2.32551	2.81356	2.02071	0.711134	1.88196	2.32551	0.556828	0.415237	0.046747	0.260746	0.581894
	2	7.69565	0.352302	2.05567	1.79163			2.05567	1.79163	1.57617	0.352302	0.395816	0.973004	1.07063	2.41563	6.94602	4.16301	0.937524			6.94602	4.16301	0.937524	1.07063	0.558503	3.32602	0.933534	0.327851	0.631511	0.586296	6.34477	5.37797	1.67195	0.631511	0.586296	6.34477	5.37797	1.67195	0.750188	1.26761	0.311598	0.289261	0.298943
	2.5	1.57617	1.87185	0.937523	2.47019			0.937523	2.47019	5.86198	1.87185	0.478613	0.388954	0.956978	0.83381	5.74271	2.45138	2.68466			5.74271	2.45138	2.68466	0.956978	1.51836	1.71772	0.592506	1.06788	1.28779	0.441879	1.5193	1.77672	0.910485	1.28779	0.441879	1.5193	1.77672	0.910485	0.683342	0.595433	0.253689	0.112626	0.144784
	3	5.86198	0.342789	1.22123	3.87239			1.22123	3.87239	6.05018	0.342789	0.360438	0.249528	0.289849	0.361194	1.15601	3.75365	1.72744			1.15601	3.75365	1.72744	0.289849	1.02927	0.313352	0.641026	0.237922	1.91931	0.299142	3.4525	6.76034	1.3448	1.91931	0.299142	3.4525	6.76034	1.3448	0.774884	0.710356	2.86196	0.536143	0.670199
	3.5	6.05018	2.31633	1.18365	0.856658			1.18365	0.856658	5.82309	2.31633	0.161822	0.407117	0.832863	0.558503	0.625328	3.57454	1.02927			0.625328	3.57454	1.02927	0.832863	1.28619	0.69342	0.784903	0.372125	1.72378	0.756182	4.24976	1.62284	1.55771		0.756182	4.24976	1.62284	1.55771	0.69049	1.14642	0.13948	0.250393	0.298198
	4	5.82309	0.154293	1.37113	0.864911			1.37113	0.864911	4.64198	0.154293	0.413218	2.14433	0.645646	1.51836	0.767381	1.02522	3.16033			0.767381	1.02522	3.16033	0.645646	0.242128	1.38409	3.05403	0.135627	1.29904	0.860546	1.89637	6.94041	0.996136		0.860546	1.89637	6.94041	0.996136	0.464671	1.07534	0.522439	0.291875	0.093471
	4.5	4.64198	0.375098	1.03998	1.23414			1.03998	1.23414	9.89404	0.375098	0.324719	0.575602	0.619948	1.02927	4.94827	2.31711	1.76211			4.94827	2.31711	1.76211	0.619948	0.854761	1.39608	0.631947	1.97021	1.16545	1.96531	1.43666	1.14184	0.27487		1.96531	1.43666	1.14184	0.27487	0.258683	0.549527	0.570737	0.427337	0.090835
	5	9.89404	0.570099	2.466	1.84797			2.466	1.84797	3.28316	0.570099	0.702749	1.12446	1.6211	1.28619	6.26999	2.80686	1.91751			6.26999	2.80686	1.91751	1.6211	0.254497	2.25065	0.23997	0.928648	0.556828	1.11258	4.10303	9.20722	5.85476		1.11258	4.10303	9.20722	5.85476	0.517534	0.223338	0.113653	0.462527	0.258217
	5.5	3.28316	0.183103	0.732087	1.50652			0.732087	1.50652	1.57711	0.183103	1.67749	0.448379	1.29311	0.242128	1.23942	1.8744	2.34922			1.23942	1.8744	2.34922	1.29311	0.843787	0.924197	0.530599	0.405759	0.750188	0.719338	2.0454	1.10858	1.5859		0.719338	2.0454	1.10858	1.5859	0.447123	0.743768	1.92524	1.09649	0.205617
	6	1.57711	3.53681	4.48569	1.54167			4.48569	1.54167	4.72048	3.53681	0.886603	0.922642	0.545307	0.854761	4.32024	1.88285	0.487964			4.32024	1.88285		0.545307	0.393522	3.80022	0.790875	0.982068	0.683342	1.22358	4.29055	1.08266	0.433417		1.22358	4.29055	1.08266	0.433417	0.54481	0.393094	0.661571	0.092184	0.195612
	6.5	4.72048	2.69894	1.18086	1.64808			1.18086	1.64808	5.93031	2.69894	1.69973	0.832236	0.289365	0.254497	1.3809	0.893127	0.140605			1.3809	0.893127		0.289365	1.33455	6.07216	0.700441	1.58243	0.774884	1.08509	4.51543	1.18742	0.43013		1.08509	4.51543	1.18742	0.43013	0.288488	0.821974	0.600989	0.408098	0.200547
	7	5.93031	0.431562	1.03591	4.1074			1.03591	4.1074	5.06157	0.431562	5.13786	1.36272	1.43264	0.843787	0.892497	4.2039	0.133617			0.892497	4.2039		1.43264	1.6209	3.20047	0.348688	0.535321	0.69049	1.29733	1.32347	0.500252	0.940033		1.29733	1.32347	0.500252	0.940033	0.948651	0.8803	0.089965	0.210568	0.153652
	7.5	5.06157	1.08149	0.933084	1.44919				1.44919	1.25515	1.08149	0.625835	0.705453	1.13568	0.393522	1.5084	5.35518	0.934039			1.5084	5.35518		1.13568	0.765344	2.64158	2.06	1.12817	0.464671	0.807475	0.808156	1.84228	4.48025		0.807475	0.808156	1.84228	4.48025	0.103861	0.861796	0.300601	0.521358	0.30394
	8	1.25515	1.02726	0.183382	3.37215				3.37215	4.63622	1.02726	0.647205	0.59473	2.47148	1.33455	4.2926	1.23792	0.327851			4.2926	1.23792		2.47148	0.599311	1.4675	3.28889	0.322883	0.258683	0.715622	0.508945	0.473288	0.412589		0.715622	0.508945	0.473288	0.412589	0.426718	0.75054	0.626052	0.267335	0.278734
	8.5	4.63622	2.06222	0.358542	1.63267				1.63267	0.974497	2.06222	0.289241	0.203548	1.40952	1.6209	1.33273	1.06727	1.06788			1.33273	1.06727		1.40952	0.435335	2.51088	0.657344	0.507896	0.517534	1.53855	1.02831	6.71645	0.212611		1.53855	1.02831	6.71645	0.212611	0.578203	0.468819	0.200449	0.357777	0.250142
	9	0.974497	0.357235	0.286274	1.91869				1.91869	7.13444	0.357235	0.786156	0.263872	3.52088	0.765344	0.917531	1.00901	0.237922			0.917531	1.00901		3.52088	0.407162	0.508081	2.51747	0.711933	0.447123	1.06803	0.755123	1.05473	0.941555		1.06803	0.755123	1.05473	0.941555	0.281796	0.416616	0.239756	0.215935	0.146244
	9.5	7.13444	3.95824	0.395816	4.30978				4.30978	4.02372	3.95824	0.833144	0.408824	1.46848	0.599311	1.26588	2.90563	0.372125			1.26588	2.90563		1.46848	0.869736	0.544131	0.67956	0.473674	0.54481	1.05338	0.096807	0.660958	1.60919		1.05338	0.096807	0.660958	1.60919	0.489082	0.673675	0.145509	0.2963	0.120265
	10	4.02372	0.772946	0.478613	2.80376				2.80376	0.583689	0.772946	0.41752	0.598714	0.25597	0.435335	2.96617	1.82537	0.135627			2.96617	1.82537		0.25597	0.311828	2.9748	1.62551	0.256575	0.288488	1.95539	2.28585	1.12892	1.10686		1.95539	2.28585	1.12892	1.10686	0.494409	0.207018	0.109532	0.318865	0.274221
	10.5	0.583689	0.761241	0.360438	4.49407				4.49407	8.85528	0.761241	1.55337	0.742143	2.67995	0.407162	3.21952	3.33193	1.97021			3.21952	3.33193		2.67995	1.17588	2.92255	0.819697	0.574295	0.948651	1.00327	2.27958	1.60612	0.687742		1.00327	2.27958	1.60612	0.687742	1.55076	0.500081	0.523502	1.97585	0.160918
	11	8.85528	4.35854	0.161822	3.17618				3.17618	4.96091	4.35854	1.89387	1.17543	3.69941	0.869736	3.10326	0.779301	0.928648			3.10326	0.779301		3.69941	0.526324	0.766249	0.825272	0.154922	0.103861	0.986254	1.39189	0.473751	1.119		0.986254	1.39189	0.473751	1.119	0.876899	0.203536	0.378393	0.207225	0.234681
	11.5	4.96091	0.138695	0.413218	1.00803				1.00803	12.1694	0.138695	1.97689	1.30011	0.464446	0.311828	0.955437	1.54871	0.405759			0.955437	1.54871		0.464446	2.05434	0.181856	0.831253	0.173023	0.426718	1.49831	3.43092	0.48831	0.63956		1.49831	3.43092	0.48831	0.63956	1.69726	0.290773	0.429761	0.173905	0.181496
	12	12.1694	1.71738	0.324719	4.82935				4.82935	12.0344	1.71738	0.89243	0.161891	1.22558	1.17588	3.19351	1.5488	0.982068			3.19351	1.5488		1.22558	1.01483	2.81201	0.46717	1.77858	0.578203	0.727848	9.38125	0.515332	0.686906		0.727848	9.38125	0.515332	0.686906	1.39608	0.168832	0.515444	0.508877	0.755254
	12.5	12.0344	0.615905	0.702749	1.13523				1.13523	9.94421	0.615905	0.703874	0.293623	1.33662	0.526324	0.855265	1.2799	1.58243			0.855265	1.2799		1.33662	1.45914	1.90834	0.883101	2.02266	0.281796	0.707349	1.12589	0.497652	2.03503		0.707349	1.12589	0.497652	2.03503	1.02792	0.238466	0.127841	0.300262	0.54793
	13	9.94421	3.17013	1.67749	1.59872				1.59872	10.9686	3.17013	0.291272	0.312351	0.851224	2.05434	1.34666	2.85817	0.535321			1.34666	2.85817		0.851224	0.642552	0.528564	1.6434	1.2352	0.489082	0.332794	2.94016	0.538643	0.905046		0.332794	2.94016	0.538643	0.905046	1.09644	0.205458	0.584462	0.361208	0.815146
	13.5	10.9686	0.493251	0.886603	1.84036				1.84036	5.54895	0.493251	0.467376	0.491348	2.11584	1.01483	0.885284	3.80427	1.12817			0.885284	3.80427		2.11584	0.300809	1.08136	1.28361	0.565422	0.494409	1.09823	2.78948	2.86873	0.637797		1.09823	2.78948	2.86873	0.637797	0.885699	0.241948	0.452603	0.246701	0.100189
	14	5.54895	0.717231	1.69973	1.74129				1.74129	7.86853	0.717231	1.35461	0.34566	0.241614	1.45914	0.827745	1.92709	0.322883			0.827745	1.92709		0.241614	0.474594	0.473918	0.380583	1.19715	1.55076	0.487409	2.48965	1.01843	2.24831		0.487409	2.48965	1.01843	2.24831	0.204381	0.142373	0.270137	0.361615	0.318207
	14.5	7.86853	2.70971	5.13786	5.71463				5.71463	11.5028	2.70971	0.591747	0.568908	0.790148	0.642552	2.42735	2.92317	0.507896			2.42735	2.92317		0.790148	0.712118	0.897062	1.07902	1.62638	0.876899	2.27743	2.69076	1.50767	0.81244		2.27743	2.69076	1.50767	0.81244	1.23814	0.150211	0.277754	0.31059	0.335884
	15	11.5028	0.675097	0.625835	1.77317				1.77317	1.45184	0.675097	0.816253	0.681984	1.38496	0.300809	9.72641	0.953344	0.711933			9.72641	0.953344		1.38496	0.950057	0.272555	1.53538	0.469806	1.69726	1.44443	6.09362	2.18989	3.36336		1.44443	6.09362	2.18989	3.36336	0.381079	0.250204	0.449812	0.460822	0.193384
	15.5	1.45184	0.522524	0.647205	2.6873				2.6873	0.140398	0.522524	0.646393	0.797526	1.86515	0.474594	1.5039	7.71971	0.473674			1.5039	7.71971		1.86515	0.992094	0.815264	0.795122	2.01296	1.39608	1.95924	2.33375	1.48737	2.88112		1.95924	2.33375	1.48737	2.88112	0.506035	0.482511	0.226575	0.777061	0.149285
	16	0.140398	0.264567	0.289241	3.76038				3.76038	0.092575	0.264567	1.94648	0.700049	0.454523	0.712118	1.9847	2.09403	0.256575			1.9847	2.09403		0.454523	0.37697	1.03564	1.11703	0.414788	1.02792	1.41868	1.41875	3.74678	2.31934		1.41868	1.41875	3.74678	2.31934	0.332541	0.323197	0.307784	0.508735	0.887941
	16.5	0.092575	0.871244	0.786156	2.25093				2.25093	3.56382	0.871244	0.847562	0.475692	3.06222	0.950057	4.39759	7.14266	0.574295			4.39759	7.14266		3.06222	0.163046	2.41571	0.466238	0.225865	1.09644	1.61904	2.8237	8.34219	0.736525		1.61904	2.8237	8.34219	0.736525	0.584021	0.263633	0.139742	0.358957	0.44331
	17	3.56382	7.19869	0.833144	4.37969				4.37969	12.2689	7.19869	1.79065	0.528366	2.31359	0.992094	1.48109	1.94776	0.154922			1.48109	1.94776		2.31359	0.305994	1.67718	1.17393	0.963634	0.885699	1.86945	2.25727	1.49111	8.15238		1.86945	2.25727	1.49111	8.15238	0.591932	0.454262	0.110831	0.523195	0.508207
		12.2689	0.584964	0.41752	0.745593				0.745593	5.17681	0.584964	0.743131	0.663538	0.910277	0.37697	4.87548	2.40646	0.173023			4.87548	2.40646		0.910277	1.00376	0.499889	1.1347	1.3937	0.204381	1.72926	1.95677	4.04008	4.32813		1.72926	1.95677	4.04008	4.32813	0.273137	0.275354	0.138637	0.373839	0.741018
		5.17681	1.46556	1.55337	0.889515				0.889515	2.97834	1.46556	2.1755	0.525103	0.82347	0.163046	5.22743	6.62967	1.77858			5.22743	6.62967		0.82347	0.637601	0.617097	0.889888	0.152472	1.23814	0.54977	3.05529	1.2512	1.39271		0.54977	3.05529	1.2512	1.39271	0.35372	0.261858	0.116888	0.691136	0.403973
		2.97834	0.872263	1.89387	8.98306				8.98306	0.645533	0.872263	1.1704	1.23581	1.32483	0.305994	2.46785	4.73329	2.02266			2.46785	4.73329		1.32483	2.00175	1.33292	1.24089	1.3556	0.381079	1.92953	0.899758	2.62325	0.499507		1.92953	0.899758	2.62325	0.499507	0.625174	0.098457	0.471682	0.225727	0.410424
		0.645533	4.11002	1.97689	1.83068				1.83068	6.64996	4.11002	1.10291	3.45027	0.848002	1.00376	1.48464	4.43532	1.2352			1.48464	4.43532		0.848002	0.366649	0.873158	0.70592	1.03266	0.506035	4.36373	1.48873	2.32918	0.651861		4.36373	1.48873	2.32918	0.651861	0.766394	0.120714	0.353464	0.295356	0.433154
		6.64996	1.96223	0.89243	4.07443				4.07443	1.78265	1.96223	1.68533	1.37887	0.783476	0.637601	1.48874	4.49381	0.565422			1.48874	4.49381		0.783476	0.870624	0.895999	0.75482	0.461013	0.332541	6.67913	0.802547	1.00434	1.58123		6.67913	0.802547	1.00434	1.58123	0.874875	0.121089	0.433231	0.999195	0.337575
		1.78265	1.22968	0.703874	2.05241				2.05241	6.4805	1.22968	1.11638	0.245265	0.32163	2.00175	1.00124	8.65808	1.19715			1.00124	8.65808		0.32163	0.452173	0.962172	0.462723	0.255891	0.584021	1.25788	1.64983	0.271581	1.6078		1.25788	1.64983	0.271581	1.6078	0.805677	0.255679	0.126423	0.41388	0.269367
		6.4805	0.582188	0.291272	1.46356				1.46356	5.67308	0.582188	0.466346	0.846062	2.07458	0.366649	0.889493	1.77035	1.62638			0.889493	1.77035		2.07458	1.25202	0.699188	1.46053	0.719085	0.591932	1.00795	1.01398	0.456598	1.36332		1.00795	1.01398	0.456598	1.36332	0.671485	0.233592	0.72899	1.05119	0.395208
		5.67308	1.01794	0.467376	2.72475				2.72475	2.63645	1.01794	0.58456	0.298563	1.19481	0.870624	6.03731	0.529975	0.469806			6.03731			1.19481	0.343704	0.651703	4.44376	0.518972	0.273137	0.860217	1.71497	0.436117	0.567453		0.860217	1.71497	0.436117	0.567453	0.48292	0.143325	0.25527	0.435701	0.513175
		2.63645	1.54718	1.35461	1.22094				1.22094	3.04108	1.54718	0.624109	0.424799	0.504441	0.452173	13.1561	1.91577	2.01296			13.1561			0.504441	2.47359	1.09909	0.779865	0.323817	0.35372	1.41127	0.730905	1.12185	1.57643		1.41127	0.730905	1.12185	1.57643	0.19283	0.224455	0.340039	0.492474	0.233624
		3.04108	0.482044	0.591747	1.60757				1.60757	3.76398	0.482044	1.081	3.21053	0.776831	1.25202	3.38854	2.39306	0.414788			3.38854			0.776831	0.521357	1.13563	0.746288	0.983828	0.625174	0.870299	1.35994	3.55018	0.311744		0.870299	1.35994	3.55018	0.311744	0.817112	0.183923	0.294633	0.816968	0.265023
		3.76398	0.164133	0.816253	2.95493				2.95493	12.8843	0.164133	1.58922	0.521197	1.14062	0.343704	4.51608	0.184835	0.225865			4.51608			1.14062	0.188204	1.05293	1.25791	4.14072	0.766394	0.147977	2.04056	1.96571	0.33313			2.04056	1.96571	0.33313	0.610866	0.656754	0.500998	0.844173	0.328969
		12.8843	0.586107	0.646393	1.03999				1.03999	0.589202	0.586107	0.234815	0.274787	1.42321	2.47359	6.56485	0.933534	0.963634			6.56485			1.42321	1.16725	1.04361	0.72625	1.15824	0.874875	0.18465	3.13132	8.40029	0.514589			3.13132	8.40029	0.514589	0.723318	1.19095	0.277688	1.39741	0.367307
		0.589202	0.35289	1.94648	0.749452				0.749452	1.64734	0.35289	0.578563	0.518324	0.768086	0.521357	2.69177	0.592506	1.3937			2.69177			0.768086	0.562032	1.11089	0.706488	0.21787	0.805677	0.328147	1.01243	2.09571	4.07695			1.01243	2.09571	4.07695	0.797047	0.987923	0.196069	0.390021	0.276318
		1.64734	0.428501	0.847562	0.511533				0.511533	8.27872	0.428501	0.929135	0.142125	2.01469	0.188204	4.34023	0.641026	0.152472			4.34023			2.01469	1.09048	0.9735	1.43609	0.362466	0.671485	0.415237	2.15014	5.12584	1.59034			2.15014	5.12584	1.59034	1.32376	0.774494	0.287119	0.652084	0.327687
		8.27872	0.536903	1.79065	0.943956				0.943956	7.40413	0.536903	0.207298	2.48161	0.591265	1.16725	1.85552	0.784903	1.3556			1.85552			0.591265	0.532539	2.5345	0.494483	0.807982	0.48292	1.26761	1.69829	1.23359	1.57106			1.69829	1.23359	1.57106	0.856718	0.466669	0.770967	1.18971	0.151781
		7.40413	0.101956	0.743131	0.217397				0.217397	2.88036	0.101956	2.76094	2.06527	5.31057	0.562032	6.09416	3.05403	1.03266			6.09416			5.31057	0.32842	0.253774	0.552024	0.358294	0.19283	0.595433	0.959828	10.7759	1.67313			0.959828	10.7759	1.67313	0.79111	0.875183	0.143052	0.977357	0.956234
		2.88036	2.0886	2.1755	0.374764				0.374764	3.49068	2.0886	1.47988	0.12315	1.10587	1.09048	1.9607	0.631947	0.461013			1.9607			1.10587	0.777906	0.907435	0.921829	1.26219	0.817112	0.710356	1.04056	1.64132	1.05005			1.04056	1.64132	1.05005	1.14416	0.902129	0.186915	0.173142	0.313631
		3.49068	2.48171	1.1704	1.36339				1.36339	2.08934	2.48171	0.552056	1.73381	1.86219	0.532539	4.40621	0.23997	0.255891			4.40621			1.86219	0.393291	0.739145	0.853498	0.129422	0.610866	1.14642	1.66209	4.48463	0.806986			1.66209	4.48463	0.806986	1.19492	0.090987	0.157667	0.251334	0.126971
		2.08934	1.03072	1.10291	4.18889				4.18889	11.88	1.03072	0.746219	0.095518	1.33866	0.32842	2.55197	0.530599	0.719085			2.55197			1.33866	0.60502	0.648623	0.541504	2.38778	0.723318	1.07534	1.05919	1.49389	0.989488			1.05919	1.49389	0.989488	1.26308	0.255215	0.391077	0.426408	0.255714
		11.88	5.2301	1.68533	1.11244				1.11244	10.4626	5.2301	2.30548	0.740619	0.857558	0.777906	1.67304	0.790875	0.518972			1.67304			0.857558	0.3907	1.61442	0.52136	0.277521	0.797047	0.549527	0.900548	2.16032	0.511468			0.900548	2.16032	0.511468	0.797606	0.235824	0.627622	0.577293	0.124523
		10.4626	0.60557	1.11638	1.1539				1.1539	0.102753	0.60557	3.29545	1.18537	0.741798	0.393291	1.14516	0.700441	0.323817			1.14516			0.741798	1.32623	0.815579	0.701608	0.365937	1.32376	0.223338	1.21035	1.94217	1.44088			1.21035	1.94217	1.44088	0.726639	0.597672	0.235221	0.343679	0.076708
		0.102753	1.45617	0.466346	0.877489				0.877489	9.99361	1.45617	1.30174	0.810888	0.864287	0.60502	1.1532	0.348688	0.983828			1.1532			0.864287	0.410185	0.779828	1.15179	1.02442	0.856718	0.743768	0.573245	1.10777	0.570742			0.573245	1.10777	0.570742	0.260603	0.620446	1.83179	0.336724	0.477183
		9.99361	0.637299	0.58456	1.80077				1.80077	2.22552	0.637299	1.35217	0.356873	2.23864	0.3907	4.09053	2.06	4.14072			4.09053			2.23864	1.69498	0.40492	0.683563	0.606792	0.79111	0.393094	1.06678	0.820584	0.793084			1.06678	0.820584	0.793084	0.828328	2.65972	1.22872	0.536939	0.490093
		2.22552	9.80327	0.624109	3.25387				3.25387	5.92739	9.80327	1.04559	0.700678	1.55755	1.32623	0.927324	3.28889	1.15824			0.927324			1.55755	0.336746	0.878165	0.968981	0.578186	1.14416	0.821974	0.902742	0.380357	0.514718			0.902742	0.380357	0.514718	0.330704	0.324678	0.454582	1.08806	0.233824
		5.92739	3.4406	1.081	0.89477				0.89477	5.86445	3.4406	0.660315	0.873051	2.71075	0.410185	3.83297	0.657344	0.21787			3.83297			2.71075	1.55742	2.45669	0.676818	0.761617	1.19492	0.8803	0.739008	0.526394	0.411733			0.739008	0.526394	0.411733	0.293608	1.44776	0.390169	0.589978	0.579198
		5.86445	2.8968	1.58922	1.44034				1.44034	13.2553	2.8968	0.240535	0.306656	1.25101	1.69498	2.67942	2.51747	0.362466			2.67942			1.25101	0.291185	0.767452	2.27274	0.333882	1.26308	0.861796	0.960825	1.56362	0.808308			0.960825	1.56362	0.808308	0.886467	0.836261	0.417636	0.234081	0.17413
		13.2553	1.52704	0.234815	0.996153				0.996153	0.180598	1.52704	1.36923	0.240608	1.17632	0.336746	4.24177	0.67956	0.807982			4.24177			1.17632	2.16115	1.3967	0.799588	0.834685	0.797606	0.75054	0.98207	3.88668	1.11224			0.98207	3.88668	1.11224	0.870158	1.1634	0.202179	0.834229	0.50299
		0.180598	2.0218	0.578563	1.16682				1.16682	5.71452	2.0218	1.45217	0.330925	2.53766	1.55742	2.33665	1.62551	0.358294			2.33665			2.53766	0.182718	1.01959	2.45611	1.14275	0.726639	0.468819	2.55299	1.8004	2.70491			2.55299	1.8004	2.70491	0.513196	1.69506	0.451965	0.490023	1.00906
		5.71452	2.25492	0.929135	1.65498				1.65498	10.8503	2.25492	1.22327	0.47484	1.09018	0.291185	2.5746	0.819697	1.26219			2.5746			1.09018	0.602105	1.77044	2.17727	0.227299	0.260603	0.416616	0.963872	4.28428	0.934242			0.963872	4.28428	0.934242	0.825691	0.425663	0.194368	0.472021	0.316041
		10.8503	1.60935	0.207298	3.16755				3.16755	2.64119	1.60935	0.770644	1.08665	0.815583	2.16115	0.473286	0.825272	0.129422			0.473286			0.815583	1.47769	0.56858	0.535639	0.27801	0.828328	0.673675	2.63923	0.844327	0.826835			2.63923	0.844327	0.826835	0.460969	0.33913	0.583863	0.311835	0.283194
		2.64119	2.16608	2.76094	7.72552				7.72552	4.51485	2.16608	0.644735	0.559566	3.4851	0.182718	1.65776	0.831253	2.38778			1.65776			3.4851	0.548946	0.652135	1.55422	0.703129	0.330704	0.207018	1.42133	0.484852	0.541645			1.42133	0.484852	0.541645	0.852723	0.065113	0.149098	0.420568	1.24435
		4.51485	0.653324	1.47988	3.20318				3.20318	5.26616	0.653324	0.231455	0.24716	1.97982	0.602105	1.96855	0.46717	0.277521			1.96855			1.97982	0.985911	0.742581	0.207752	0.710197	0.293608	0.500081	2.48889	1.53503	0.571314			2.48889	1.53503	0.571314	0.820778	0.347028	0.511072	0.452947	0.187449
		5.26616	0.980017	0.552056	1.41019				1.41019	7.36549	0.980017	1.20499	0.401044	1.03183	1.47769	4.81842	0.883101	0.365937			4.81842			1.03183	0.707397	0.241866	1.62692	0.155683	0.886467	0.203536	2.35805	1.02385	0.614099			2.35805	1.02385	0.614099	0.742187	0.516766	0.364936	0.891984	0.715957
		7.36549	0.657725	0.746219	0.653658				0.653658	5.75833	0.657725	1.21424	0.229951	0.966009	0.548946	4.07542	1.6434	1.02442			4.07542			0.966009	0.475163	1.14899	1.01311	0.958971	0.870158	0.290773	0.5646	2.89467	0.403613			0.5646	2.89467	0.403613	0.804458	0.337106	0.409888	0.272602	0.198027
		5.75833	0.734777	2.30548	1.14482				1.14482	3.64588	0.734777	0.391244	0.370704	5.89374	0.985911	3.43416	1.28361	0.606792			3.43416			5.89374	0.300864	1.11876	1.66156	0.694243	0.513196	0.168832	0.630207	2.38221	1.25568			0.630207	2.38221	1.25568	0.599775	0.416949	0.384097	1.042	0.645991
		3.64588	1.14578	3.29545	1.45406				1.45406	2.47182	1.14578	0.207376	1.6302	0.274475	0.707397	2.30952	0.380583	0.578186			2.30952			0.274475	0.701394	1.8099	0.710106	0.181007	0.825691	0.238466	2.13317	1.78929	3.32749			2.13317	1.78929	3.32749	0.574661	0.145847	0.366021	0.468812	0.410913
		2.47182	1.46528	1.30174	0.635401				0.635401	3.41321	1.46528	3.53674	0.349809	0.968757	0.475163	0.693784	1.07902	0.761617			0.693784			0.968757	1.03765	4.65864	0.347722	0.785231	0.460969	0.205458	0.397589	0.658469	1.23553			0.397589	0.658469	1.23553	0.489936	0.170106	0.6433	0.351366	0.090615
		3.41321		1.35217	2.14287				2.14287	8.32362		2.13682	1.20641	0.898534	0.300864	6.45374	1.53538	0.333882			6.45374			0.898534	0.213362	1.9587	1.01273	0.294409	0.852723	0.241948	0.732527	0.204391	2.88606			0.732527	0.204391	2.88606	0.275504	0.404924	0.672199	0.30469	0.147759
		8.32362		1.04559	1.23658				1.23658	6.93049		1.56689	0.653658	0.732486	0.701394	2.34402	0.795122	0.834685			2.34402			0.732486	0.465872	0.905079	0.764333	0.368801	0.820778	0.142373	5.13916	0.294356	0.422331			5.13916	0.294356	0.422331	0.59512	0.219619	0.308327	0.38537	0.202588
		6.93049		0.660315	2.64654				2.64654	2.71069		1.23601	2.42079	3.01438	1.03765	3.53702	1.11703	1.14275			3.53702			3.01438	0.695687	2.64364	0.662596	0.105751	0.742187	0.150211	1.41226	1.68865	1.49771			1.41226	1.68865	1.49771	0.770177	0.836746	0.240743	1.3781	0.393575
		2.71069		0.240535	1.66786				1.66786	4.85075		1.16087	0.662529	3.83784	0.213362	5.35316	0.466238	0.227299						3.83784	0.453963	0.770918	0.639656	1.07804	0.804458	0.250204	0.795553	0.733066	2.42753			0.795553	0.733066	2.42753	0.505635	0.2989	0.410601	0.56754	0.14396
		4.85075		1.36923	1.54314				1.54314	10.6062		0.261288	0.400146	3.15567	0.465872	0.502429	1.17393	0.27801						3.15567	0.620055	0.776624	0.753188	0.245571	0.599775	0.482511	1.32279	0.585835	0.602889			1.32279	0.585835	0.602889	0.732338	0.326112	0.215578	0.409589	0.160692
		10.6062		1.45217	0.899687				0.899687	3.96062		0.926025	0.284562	6.03853	0.695687	2.15269	1.1347	0.703129						6.03853	0.450416	1.60198	0.985726	0.418043	0.574661	0.323197	2.37226	0.286522	1.55276			2.37226	0.286522	1.55276	0.293727	0.507663	0.119809	0.077888	0.916846
		3.96062		1.22327	0.384419				0.384419	2.04016		0.566167		1.4986	0.453963	2.67306	0.889888	0.710197						1.4986	0.747887	2.12798	0.175182	0.099236	0.489936	0.263633	4.36046	0.618947	0.466468			4.36046	0.618947	0.466468	0.452134	0.277649	1.3414	0.127538	0.637431
		2.04016		0.770644	0.457752				0.457752	3.09535		0.723252		1.37879	0.620055	3.32602	1.24089	0.155683						1.37879	0.599642	1.78735	1.32721	0.545224	0.275504	0.454262	0.993854	0.879582	0.998071			0.993854	0.879582	0.998071	0.220321	1.57001	0.415015	0.39519	0.376916
		3.09535		0.644735	0.482716				0.482716	9.23476		0.461843		0.779072	0.450416	1.71772	0.70592	0.958971						0.779072	0.424732	1.09371	0.820495	0.168929	0.59512	0.275354	1.87131	0.565493	0.667709			1.87131	0.565493	0.667709	0.316231	0.364645	0.992513	0.159074	0.51289
		9.23476		0.231455	1.19987				1.19987	9.01738		0.125008		1.79935	0.747887	0.313352	0.75482	0.694243						1.79935	1.0412	0.95662	0.548763	0.340456	0.770177	0.261858	2.17337	0.994972	2.17353			2.17337	0.994972	2.17353	0.12849	0.13667	0.393339	0.53692	0.221098
		9.01738		1.20499	1.72795				1.72795	8.31593		0.562923		3.4958	0.599642	0.69342	0.462723	0.181007						3.4958	0.487412	0.939491	0.894614	0.477921	0.505635	0.098457	2.44547	0.313567	0.314456			2.44547	0.313567	0.314456	0.246232	0.832515	0.377286	0.331671	0.282314
		8.31593		1.21424	1.65394				1.65394	14.7116		1.68925		0.980378	0.424732	1.38409	1.46053	0.785231						0.980378	0.280696	0.828529	0.910826	1.62848	0.732338	0.120714	0.807058	0.797041	0.895413			0.807058	0.797041	0.895413	0.291781	0.371759	1.38433	0.238752	0.625228
		14.7116		0.391244	0.685201				0.685201	6.39864		0.368447		2.39377	1.0412	1.39608	4.44376	0.294409						2.39377	0.609018	1.06614	0.471187	0.145231	0.293727	0.121089	1.9393	1.0635	1.37436			1.9393	1.0635	1.37436	0.221523	1.02636	0.420355	0.253963	0.563299
		6.39864		0.207376	1.78131				1.78131	3.86586		1.20042		2.52797	0.487412	2.25065	0.779865	0.368801						2.52797	0.211991	2.0574	0.722668	1.01624	0.452134	0.255679	0.795706	2.40226	2.28222			0.795706	2.40226	2.28222	0.208577	0.540687	0.515716	0.274836	0.514274
		3.86586		3.53674	0.308727					2.7057		1.45262		0.517999	0.280696	0.924197	0.746288	0.105751						0.517999	1.56576	1.67809	1.18477	0.866026	0.220321	0.233592	1.7328	0.785241	1.49982			1.7328	0.785241	1.49982	0.138786	0.394704	0.212453	0.198338	0.659976
		2.7057		2.13682	0.66451					7.21939		1.01936		1.15678	0.609018	3.80022	1.25791	1.07804						1.15678	0.231884	0.598866	1.01448	0.895376	0.316231	0.143325	7.07153	0.641995	1.85293			7.07153	0.641995	1.85293	0.623259	1.32838	0.541215	0.25662	0.2307
		7.21939		1.56689	2.19139					5.22808		1.05872		1.11824	0.211991	6.07216	0.72625	0.245571						1.11824	1.38889	0.559489	0.31723	3.3696	0.12849	0.224455	2.00542	0.695374	0.54812			2.00542	0.695374	0.54812	1.05385	2.97121	0.229255	0.197773	0.237796
		5.22808		1.23601	0.413954					3.26567		1.49767		4.8867	1.56576	3.20047	0.706488	0.418043						4.8867	0.446049	1.14765	1.03093	2.42868	0.246232	0.183923	1.98981	0.781284	1.35644			1.98981	0.781284	1.35644	0.279656	0.406513	0.331379	0.83289	0.268026
		3.26567		1.16087	0.973004					10.3137		1.6691		2.43116	0.231884	2.64158	1.43609	0.099236						2.43116	0.703163	1.04671	0.575634	0.826653	0.291781	0.656754	2.0704	1.44127	0.939654			2.0704	1.44127	0.939654	0.207898	0.41637	0.206567	0.180866	0.287844
		10.3137		0.261288	0.388954					6.61956		0.732031		1.15584	1.38889	1.4675	0.494483	0.545224						1.15584	0.643875	0.581243	0.663664	0.600589	0.221523	1.19095	0.688823	0.462591	1.21964			0.688823	0.462591	1.21964	0.963957	0.721334	0.575915	0.24241	0.133371
		6.61956		0.926025	0.249528					0.962978		1.04589		1.5383	0.446049	2.51088	0.552024	0.168929						1.5383	0.416804	0.605283	0.3735	0.130393	0.208577	0.987923	1.42651	0.615851	1.42484			1.42651	0.615851	1.42484	0.523293	0.379505	0.217811	0.325953	0.06867
		0.962978		0.566167	0.407117					0.873543		1.75108		0.582757	0.703163	0.508081	0.921829	0.340456						0.582757	0.615804	1.99394	2.45919	0.119432	0.138786	0.774494	0.593902	1.60562	0.145404			0.593902	1.60562		0.434124	0.842083	0.483725	0.252125	0.21705
		0.873543		0.723252	2.14433					7.47121		3.91685		3.64364	0.643875	0.544131	0.853498	0.477921						3.64364	0.529419	0.606639	2.35782	0.105628	0.623259	0.466669	1.44925	0.409237	0.412288			1.44925	0.409237		0.505313	0.259953	0.211509	0.131735	0.09846
		7.47121		0.461843	0.575602					3.5321		0.457991		2.36954	0.416804	2.9748	0.541504	1.62848						2.36954	2.16748	0.679498	0.82414	0.09391	1.05385	0.875183	1.30863	0.599146	0.345808			1.30863	0.599146		0.283832	0.304054	1.9221	0.228765	0.574931
		3.5321		0.125008	1.12446					6.09203		0.578596		1.44335	0.615804	2.92255	0.52136	0.145231						1.44335	0.435935	0.442291	0.3329	0.362966	0.279656	0.902129	1.66326	4.42481	0.581894			1.66326	4.42481		0.144921	0.379224	2.10365	0.309564	0.212683
		6.09203		0.562923	0.448379					1.03233		1.15412		1.50849	0.529419	0.766249	0.701608	1.01624						1.50849	0.919297	1.54819	0.280593	1.07289	0.207898	0.090987	0.561396	2.83825	0.298943			0.561396	2.83825		0.193006	0.967497	0.728545	0.172635	0.133713
		1.03233		1.68925	0.922642					1.62805		0.755767		0.312066	2.16748	0.181856	1.15179	0.866026						0.312066	0.843427	0.846872	0.698877	0.281423	0.963957	0.255215	1.20939	3.862	0.144784			1.20939	3.862		0.16401	0.625717	0.699218	0.173265	0.769227
		1.62805		0.368447	0.832236					3.23506		0.69201		2.75695	0.435935	2.81201	0.683563	0.895376						2.75695	0.723055	0.886483	0.763607	0.672225	0.523293	0.235824	1.87379	4.22928	0.670199			1.87379	4.22928		0.270805	0.577737	0.612203	0.672492	0.140526
		3.23506		1.20042	1.36272					10.4339		1.73458		4.16481	0.919297	1.90834	0.968981	3.3696						4.16481	0.839693	0.599279	1.15905	0.11144	0.434124	0.597672	2.40676	0.788972	0.298198			2.40676	0.788972		0.932257	0.263648	0.512927	0.682794	1.90106
		10.4339		1.45262	0.705453					7.38521		0.569874		0.711021	0.843427	0.528564	0.676818	2.42868						0.711021	0.371417	0.750698	0.577433	0.290118	0.505313	0.620446	1.0018	1.10224	0.093471			1.0018	1.10224		0.543771	0.82193	0.401995	0.297858	0.106526
		7.38521		1.01936	0.59473					9.43485		2.08738		2.1474	0.723055	1.08136	2.27274	0.826653						2.1474	3.54962	0.64848	0.451389	0.207447	0.283832	2.65972	0.45625	1.98425	0.090835			0.45625	1.98425		0.371223	0.224731	0.284143	0.390608	0.130139
		9.43485		1.05872	0.203548					4.28541		0.850521		1.83824	0.839693	0.473918	0.799588	0.600589						1.83824	2.14754	0.403589	0.659116	0.994464	0.144921	0.324678	0.866623	3.23649	0.258217			0.866623	3.23649		0.288704	1.39917	0.300049	0.525469	0.130678
		4.28541		1.49767	0.263872					10.016		0.792501		1.54524	0.371417	0.897062	2.45611	0.130393						1.54524	0.204677	1.30773	1.40851	0.34655	0.193006	1.44776	1.75174	1.63268	0.205617			1.75174	1.63268		0.137885	0.328524	0.474213	0.137556	0.1296
		10.016		1.6691	0.408824					3.30454		1.27748		2.32449	3.54962	0.272555	2.17727	0.119432						2.32449	1.00726	0.547854	0.431974	1.96279	0.16401	0.836261	0.941609	1.95026	0.195612			0.941609	1.95026		0.351331	0.40968	0.335958	0.57526	0.624778
		3.30454		0.732031	0.598714					8.40343		0.297499		1.3765	2.14754	0.815264	0.535639	0.105628						1.3765	0.206631	0.753744	0.649551	0.276153	0.270805	1.1634	0.972382	1.44148	0.200547			0.972382	1.44148		0.473149	0.940601	0.221551	0.343531	0.361435
		8.40343		1.04589	0.742143					3.64362		1.28243		1.40365	0.204677	1.03564	1.55422	0.09391						1.40365	0.372189	0.501282	1.09329	0.300173	0.932257	1.69506	1.45456	1.14962	0.153652			1.45456	1.14962		0.268734	0.403655	0.42938	0.465072	0.330417
		3.64362		1.75108	1.17543					3.37448		0.86285		0.563224	1.00726	2.41571	0.207752	0.362966						0.563224	1.74594	1.91558	1.51294	0.832079	0.543771	0.425663	1.55519	0.519127	0.30394			1.55519	0.519127		0.406097	0.403702	0.262646	0.473106	0.094133
		3.37448		3.91685	1.30011					2.37789		1.13204		1.9492	0.206631	1.67718	1.62692	1.07289						1.9492	1.00411	0.734604	1.07955	0.177247	0.371223	0.33913	1.32859	1.68123	0.278734			1.32859	1.68123		0.227538	0.523144	0.182915	0.204842	0.132481
		2.37789		0.457991	0.161891					10.7773		1.03761		3.86285	0.372189	0.499889	1.01311	0.281423						3.86285	0.986575	2.63944	0.184777	0.579447	0.288704	0.065113	1.36125	1.1663	0.250142			1.36125	1.1663		0.108563	1.28172	0.69302	0.447564	0.313867
		10.7773		0.578596	0.293623					6.01634		0.275461		2.90679	1.74594	0.617097	1.66156	0.672225						2.90679	1.22003	1.14629	0.279989	0.543133	0.137885	0.347028	4.44213	1.68129	0.146244			4.44213	1.68129		0.800891	1.00565	0.660869	0.242691	0.586671
		6.01634		1.15412	0.312351					1.77937		0.687255		0.848335	1.00411	1.33292	0.710106	0.11144						0.848335	0.703345	1.73223	1.41138	0.684359	0.351331	0.516766	3.3431	3.57707	0.120265			3.3431	3.57707		0.290767	0.988273	0.651022	0.378096	0.522349
		1.77937		0.755767	0.491348					2.63597		0.862986		1.59973	0.986575	0.873158	0.347722	0.290118						1.59973	0.428685	1.35997	0.843391	1.12112	0.473149	0.337106	1.73826	0.320412	0.274221			1.73826	0.320412		0.195633	0.352741	0.693744	0.380772	0.099403
		2.63597		0.69201	0.34566					3.96491		3.67674		1.62732	1.22003	0.895999	1.01273	0.207447						1.62732	1.81773	0.505778	0.358999	0.271611	0.268734	0.416949	0.955014	0.193724	0.160918			0.955014	0.193724		0.429464	0.556477	0.25074	0.299118	0.579089
		3.96491		1.73458	0.568908					3.43139		0.789444		3.64409	0.703345	0.962172	0.764333	0.994464						3.64409	4.18342	1.58707	0.510239	0.544473	0.406097	0.145847	0.796163	5.15504	0.234681			0.796163	5.15504		0.1567	0.501675	0.206026	0.629126	0.194376
		3.43139		0.569874	0.681984					2.59875		0.438458		9.39453	0.428685	0.699188	0.662596	0.34655						9.39453	0.884309	1.52902	1.24124	0.923006	0.227538	0.170106	1.18336	0.342374	0.181496			1.18336	0.342374		0.218875	0.60574	0.614787	0.2139	0.111616
		2.59875		2.08738	0.797526					2.94694		0.655835		3.57543	1.81773	0.651703	0.639656	1.96279						3.57543	0.53819	1.19562	0.160768	0.801993	0.108563	0.404924	1.12591	1.26932	0.755254			1.12591	1.26932		0.262064	0.423348	0.73778	0.275468	0.19844
		2.94694		0.850521	0.700049					2.83716		0.721499		0.470288	4.18342	1.09909	0.753188	0.276153						0.470288	1.69297	0.864558	0.404124	1.23438	0.800891	0.219619	0.710094	0.454871	0.54793			0.710094	0.454871		0.327176	0.573655	1.15884	0.127067	0.163124
		2.83716		0.792501	0.475692					3.59659		0.568203		2.92701	0.884309	1.13563	0.985726	0.300173						2.92701	0.542878	0.225091	0.897815	0.948635	0.290767	0.836746	3.24033	1.88915	0.815146			3.24033	1.88915		0.219941	0.480502	0.197825	0.283406	0.087506
		3.59659		1.27748	0.528366					3.75278		0.473661		1.25207	0.53819	1.05293	0.175182	0.832079						1.25207	0.458579	0.967791	0.62791	0.328161	0.195633	0.2989	0.72374	0.673636	0.100189			0.72374	0.673636		0.185662	0.158105	2.18151	0.131546	0.286822
		3.75278		0.297499	0.663538					4.18762		0.684343		5.0518	1.69297	1.04361	1.32721	0.177247						5.0518	1.30269	0.565855	0.799794	0.7285	0.429464	0.326112	1.04678	2.54356	0.318207			1.04678	2.54356		0.234026	0.833867	0.276381	0.219325	0.20112
		4.18762		1.28243	0.525103					2.39463		0.798979		5.21066	0.542878	1.11089	0.820495	0.579447						5.21066	2.65938	1.15621	0.321807	0.458997	0.1567	0.507663	0.393173	0.881761	0.335884			0.393173	0.881761		0.46164	0.240883	0.448997	0.265821	0.472275
		2.39463		0.86285	1.23581					0.843103		0.578175		1.59409	0.458579	0.9735	0.548763	0.543133						1.59409	0.573362	0.781437	0.413041	0.483304	0.218875	0.277649	0.631648	1.63683	0.193384			0.631648	1.63683		0.674634	0.768037	0.456182	0.376143	0.137944
		0.843103		1.13204	3.45027					4.81721		2.19078		1.87749	1.30269	2.5345	0.894614	0.684359						1.87749	1.4031	0.525322	0.775872	1.41438	0.262064	1.57001	1.14033	11.3445	0.149285			1.14033	11.3445		0.379769	0.148699	1.3448	0.128053	0.113557
		4.81721		1.03761	1.37887					0.394146		0.253007		2.32051	2.65938	0.253774	0.910826	1.12112						2.32051	0.102911	0.965367	0.760743	0.985054	0.327176	0.364645	1.27203	9.17041	0.887941			1.27203	9.17041		0.734672	0.473917	0.437424	0.30023	0.071682
		0.394146		0.275461	0.245265					0.456743		0.834282		1.09546	0.573362	0.907435	0.471187	0.271611						1.09546	1.21804	1.03599	0.412482	0.943862	0.219941	0.13667	1.13497	0.507142	0.44331			1.13497	0.507142		0.865428	0.616969	0.425115	0.164177	0.121559
		0.456743		0.687255	0.846062					0.505204		1.01362		0.652981	1.4031	0.739145	0.722668	0.544473						0.652981	1.41244	1.84031	1.33637	1.34865	0.185662	0.832515	1.90546	8.19944	0.508207			1.90546	8.19944		0.974764	0.333453	0.298421	0.30891	0.177635
		0.505204		0.862986	0.298563					1.05767		0.958313		1.04427	0.102911	0.648623	1.18477	0.923006						1.04427	0.434389	0.744628	0.434577	0.544406	0.234026	0.371759	3.18156	2.03169	0.741018			3.18156	2.03169		0.679672	1.15426	0.202619	0.118861	0.365171
		1.05767		3.67674	0.424799					1.25104		1.50812		1.42943	1.21804	1.61442	1.01448	0.801993						1.42943	1.39469	0.826232	0.453621	1.5731	0.46164	1.02636	0.649502	2.22657	0.403973			0.649502	2.22657		0.677945	0.50765	2.65058	0.073652	0.363035
		1.25104		0.789444	3.21053					1.30683		0.71496		4.72317	1.41244	0.815579	0.31723	1.23438						4.72317	1.23542	0.451	1.06835	0.602286	0.674634	0.540687	0.926936	2.41187	0.410424			0.926936	2.41187		0.479069	0.158865	0.2053	0.066333	0.111179
		1.30683		0.438458	0.521197					0.924611		0.920548		4.49986	0.434389	0.779828	1.03093	0.948635						4.49986	0.562975	0.463341	1.33884	2.83726	0.379769	0.394704	1.68594	1.60753	0.433154			1.68594	1.60753		0.322802	0.369365	0.182031	0.066323	1.0831
		0.924611		0.655835	0.274787							1.4374		4.67541	1.39469	0.40492	0.575634	0.328161						4.67541	2.00351	1.65464	0.637677	0.119138	0.734672	1.32838	0.851282	5.4043	0.337575			0.851282	5.4043		0.369308	0.553241	0.28198	0.271036	0.273201
				0.721499	0.518324							0.766094		3.39843	1.23542	0.878165	0.663664	0.7285						3.39843	0.485508	0.779611	0.285864	0.96858	0.865428	2.97121	1.19305	11.6029	0.269367			1.19305	11.6029		0.281638	0.682419	0.234044	0.334888	0.138324
				0.568203	0.142125							0.683455		0.671911	0.562975	2.45669	0.3735	0.458997						0.671911	1.21034	0.41777	0.651227	0.254768	0.974764	0.406513	0.826692	1.115	0.395208			0.826692	1.115		0.517359	0.353069	0.473205	0.31991	0.52157
				0.473661	2.48161							1.22348		1.21778	2.00351	0.767452	2.45919	0.483304						1.21778	1.86053	0.983754	0.58064	0.747005	0.679672	0.41637	0.354024	3.16277	0.513175			0.354024	3.16277		0.984209	0.462029	0.572135	0.30834	0.132252
				0.684343	2.06527							0.52189		1.20157	0.485508	1.3967	2.35782	1.41438						1.20157	0.138183	0.9217	1.41413	0.399768	0.677945	0.721334	3.67397	4.4766	0.233624			3.67397	4.4766		0.343204	0.430815	0.294206	0.101566	0.116521
				0.798979	0.12315							0.44845		1.87579	1.21034	1.01959	0.82414	0.985054						1.87579	0.35175	0.559151	0.508538	1.09167	0.479069	0.379505	1.78749	7.14031	0.265023			1.78749	7.14031		1.08147	0.261503	0.20215	0.393285	1.17393
				0.578175	1.73381							1.40111		1.23869	1.86053	1.77044	0.3329	0.943862						1.23869	0.578998	0.736124	0.170986	0.631511	0.322802	0.842083	0.591464	1.28617	0.328969			0.591464	1.28617		1.16702	0.47846	0.701276	0.346647	1.05201
				2.19078	0.095518							0.15155		6.31688	0.138183	0.56858	0.280593	1.34865						6.31688	0.749004	0.608548	0.3039	0.471179	0.369308	0.259953	3.36505	2.61543	0.367307			3.36505	2.61543		0.824121	0.440421	0.709883	0.694144	0.421002
				0.253007	0.740619							1.2609		2.01179	0.35175	0.652135	0.698877	0.544406						2.01179	0.482754	0.757404	0.523439	0.555359	0.281638	0.304054	1.67862	2.74347	0.276318			1.67862	2.74347		0.698122	0.308204	0.952706	0.15101	0.234323
				0.834282	1.18537							1.24801		3.54962	0.578998	0.742581	0.763607	1.5731						3.54962	1.03283	0.488128	0.743037	0.532063	0.517359	0.379224	0.436401	1.34212	0.327687			0.436401	1.34212		0.343533	1.11126	0.30967	0.286991	0.598414
				1.01362	0.810888							1.01259		1.02742	0.749004	0.241866	1.15905	0.602286						1.02742	0.326815	2.42603	0.323927	0.972643	0.984209	0.967497	0.797494	1.13354	0.151781			0.797494	1.13354		1.15048	0.530071	0.322191	0.26284	0.47533
				0.958313	0.356873							0.657391		1.32935	0.482754	1.14899	0.577433	2.83726						1.32935	1.73458	1.12444	0.394384	0.428429	0.343204	0.625717	0.22053	0.989679	0.956234			0.22053	0.989679		0.289365	0.330637	0.470056	0.220006	0.676827
				1.50812	0.700678							0.952849		0.129077	1.03283	1.11876	0.451389	0.119138						0.129077	0.232583	1.22433	0.346759	1.13336	1.08147	0.577737	0.172731	1.64691	0.313631			0.172731	1.64691		0.099459	0.145102	0.373829	0.213536	0.515608
				0.71496	0.873051							0.675102		3.51402	0.326815	1.8099	0.659116	0.96858						3.51402	0.176314	1.02932	0.407981	0.773164	1.16702	0.263648	1.84133	1.94578	0.126971			1.84133	1.94578		0.201863	0.508728	0.31416	0.336546	0.402099
				0.920548	0.306656							0.687446		1.57523	1.73458	4.65864	1.40851	0.254768						1.57523	0.2302	1.18788	0.360464	0.2956	0.824121	0.82193	0.31774	1.18954	0.255714			0.31774	1.18954		0.259467	0.828019	0.732067	0.413493	0.507843
				1.4374	0.240608							0.340244		0.322099	0.232583	1.9587	0.431974	0.747005						0.322099	0.47799	0.95932	0.851425	0.522675	0.698122	0.224731	0.588286	0.931601	0.124523			0.588286	0.931601		1.13425	0.259721	0.3196	0.134704	0.110838
				0.766094	0.330925							1.66416		0.936336	0.176314	0.905079	0.649551	0.399768						0.936336	0.12389	1.57274	0.183589	4.07614	0.343533	1.39917	0.465288	1.30822	0.076708			0.465288	1.30822		0.748039	0.525947	0.178347	0.200921	0.350213
				0.683455	0.47484							2.4682		1.95187	0.2302	2.64364	1.09329	1.09167						1.95187	1.53724	0.478881	1.59606	0.80724	1.15048	0.328524	1.06319	0.665534	0.477183			1.06319	0.665534		0.281827	0.840123	0.368284	0.822401	0.236593
				1.22348	1.08665							0.320711		2.16667	0.47799	0.770918	1.51294	0.631511						2.16667	0.518963	0.721638	1.00194	1.49553	0.289365	0.40968	0.52152	2.37916	0.490093			0.52152	2.37916		0.15161	0.205748	0.518699	0.286293	0.339972
				0.52189	0.559566							0.545118		0.37274	0.12389	0.776624	1.07955	0.471179						0.37274	1.5777	1.91301	0.202048	0.791331	0.099459	0.940601	4.34095	2.44825	0.233824			4.34095	2.44825		0.671724	0.29975	0.86673	0.501624	0.107072
				0.44845	0.24716							0.306224		1.04132	1.53724	1.60198	0.184777	0.555359						1.04132	0.360474	1.28798	0.765949	0.863745	0.201863	0.403655	1.81388	2.51148	0.579198			1.81388	2.51148		0.107345	0.256193	0.133972	0.482536	0.338032
				1.40111	0.401044							0.957329		1.89975	0.518963	2.12798	0.279989	0.532063						1.89975	0.733213	0.828244	0.520718	0.32462	0.259467	0.403702	0.787448	4.91769	0.17413			0.787448	4.91769		0.063131	0.380127	0.323335	0.655288	1.28718
				0.15155	0.229951							0.644578		0.73865	1.5777	1.78735	1.41138	0.972643						0.73865	1.54369	0.918954	0.454003	0.193136	1.13425	0.523144	1.04142	1.09753	0.50299			1.04142	1.09753		0.261483	1.07049	0.306881	0.453819	0.610444
				1.2609	0.370704							0.552494		0.652772	0.360474	1.09371	0.843391	0.428429						0.652772	0.771365	1.34818	1.97532	0.262672	0.748039	1.28172	2.16668	6.21627	1.00906			2.16668	6.21627		0.2613	0.194558	0.413084	0.387446	0.086231
				1.24801	1.6302							0.870569		2.10034	0.733213	0.95662	0.358999	1.13336						2.10034	0.155462	0.631016	1.54973	0.871746	0.281827	1.00565	1.02299	1.89222	0.316041			1.02299	1.89222		0.10075	0.079649	0.237509	0.302514	0.225083
				1.01259	0.349809							0.456787		2.39419	1.54369	0.939491	0.510239	0.773164						2.39419	0.912228	2.41359	0.271988	0.254835	0.15161	0.988273	4.53526	1.02809	0.283194			4.53526	1.02809		0.144344	0.333974	0.267039	0.38	0.12561
				0.657391	1.20641							2.43019		2.64317	0.771365	0.828529	1.24124	0.2956						2.64317	0.608119	1.25009	1.86628	0.603812	0.671724	0.352741	1.75061	0.199768	1.24435			1.75061	0.199768		0.538052	0.165894	0.776855	0.422207	0.248176
				0.952849	0.653658							1.44619		0.740921	0.155462	1.06614	0.160768	0.522675						0.740921	0.706344	0.698684	0.943473	0.295119	0.107345	0.556477	0.547304	0.599638	0.187449			0.547304	0.599638		0.286136	0.453676	1.46724	0.620085	0.18588
				0.675102	2.42079							1.3392		0.455465	0.912228	2.0574	0.404124	4.07614						0.455465	1.21727	1.20462	0.773516	1.19879	0.063131	0.501675	0.963536	3.78274	0.715957			0.963536	3.78274		0.209071	0.528134	0.462	0.399442	0.173811
				0.687446	0.662529							1.41836		0.786082	0.608119	1.67809	0.897815	0.80724						0.786082	2.17844	1.01738	0.345029	0.628028	0.261483	0.60574	2.06907	3.23689	0.198027			2.06907	3.23689		0.104755	0.27582	0.486491	0.251245	0.259717
				0.340244	0.400146							0.598067		1.47319	0.706344	0.598866	0.62791	1.49553						1.47319	1.75361	5.3897	0.573225	0.732426	0.2613	0.423348	1.10147	2.8947	0.645991			1.10147	2.8947		0.062042	0.306915	0.41565	0.342164	0.155536
				1.66416	0.284562							2.09342		3.25465	1.21727	0.559489	0.799794	0.791331						3.25465	0.878718	1.10653	0.575898	1.77168	0.10075	0.573655	1.15803	0.516725	0.410913			1.15803	0.516725		0.423313	0.37321	0.433445	0.144663	0.429784
				2.4682								0.875191		2.90375	2.17844	1.14765	0.321807	0.863745						2.90375	0.848835	0.708275	0.36927	1.67194	0.144344	0.480502	1.07443	0.298646	0.090615			1.07443	0.298646		0.375955	0.099508	0.262087	0.533802	0.938933
				0.320711								0.716397		2.67761	1.75361	1.04671	0.413041	0.32462						2.67761	0.842069	1.55684	0.294809	0.629114	0.538052	0.158105	1.47029	1.23183	0.147759			1.47029	1.23183		0.410609	0.097101	0.294722	0.51129	0.092842
				0.545118								1.78192		2.97672	0.878718	0.581243	0.775872	0.193136						2.97672	0.346896	0.459462	0.274482	2.76315	0.286136	0.833867	1.9627	2.44337	0.202588			1.9627	2.44337		1.78033	0.392036	0.13284	0.766034	0.489984
				0.306224								0.265449		1.04753	0.848835	0.605283	0.760743	0.262672						1.04753	0.195264	1.33933	0.429691	0.959407	0.209071	0.240883	2.42497	0.845775	0.393575			2.42497	0.845775		1.27718	0.70043	0.244643	0.303411	0.126302
				0.957329								0.533114		1.47872	0.842069	1.99394	0.412482	0.871746						1.47872	1.21591	1.77234	0.693082	0.553886	0.104755	0.768037	1.13273	0.658556	0.14396			1.13273	0.658556		0.672899	0.274541	0.408971	0.189608	0.168034
				0.644578								0.555235		3.2848	0.346896	0.606639	1.33637	0.254835						3.2848	1.32144	1.12438	1.22562	1.16551	0.062042	0.148699	1.90541	1.14982	0.160692			1.90541	1.14982		1.70632	0.600554	0.169599	0.188462	0.532029
				0.552494								1.58435		0.590175	0.195264	0.679498	0.434577	0.603812						0.590175	0.475995	0.448696	0.285865	0.791547	0.423313	0.473917	2.54593	0.476377	0.916846			2.54593	0.476377		1.79688	0.209001	0.285972	0.267665	0.568974
				0.870569								0.758007		6.80911	1.21591	0.442291	0.453621	0.295119						6.80911		1.22215	2.02831	0.326659	0.375955	0.616969	0.583864	1.19001	0.637431			0.583864	1.19001		0.640466	0.405168	0.345334	0.19664	0.266858
				0.456787								1.51281		1.80204	1.32144	1.54819	1.06835	1.19879						1.80204		0.955427	0.270268	0.284422	0.410609	0.333453	0.614947	0.789987	0.376916			0.614947	0.789987		1.01051	0.255412	0.280905	0.307919	0.302842
				2.43019								1.11319		3.29134	0.475995	0.846872	1.33884	0.628028						3.29134		0.955298	1.44528	1.0041	1.78033	1.15426	0.395793	0.508623	0.51289			0.395793	0.508623		0.499381	0.19032	0.191435	0.414282	0.490767
				1.44619								0.200225		2.58891		0.886483	0.637677	0.732426						2.58891		1.95312	0.504036	1.37337	1.27718	0.50765	1.3721	0.87466	0.221098			1.3721	0.87466		0.146521	0.476781	0.758295	0.210188	0.600107
				1.3392								0.723052		1.49513		0.599279	0.285864	1.77168						1.49513		0.873078	0.774823	0.979176	0.672899	0.158865	2.39664	0.48855	0.282314			2.39664	0.48855		0.141213	0.394158	0.783255	3.09166	1.88813
				1.41836								5.4613		4.26771		0.750698	0.651227	1.67194						4.26771		1.5704	0.912475	0.720061	1.70632	0.369365	6.316	0.263742	0.625228			6.316	0.263742		0.35005	1.28121	0.380451	0.756299	0.553411
				0.598067								0.743434		3.89573		0.64848	0.58064	0.629114						3.89573		0.796417	0.152795	0.769395	1.79688	0.553241	0.486273	4.43714	0.563299			0.486273	4.43714		0.235571	0.640932	0.215083	1.21672	0.26004
				2.09342								5.36844		4.93833		0.403589	1.41413	2.76315						4.93833		0.540137	0.834862	0.575608	0.640466	0.682419	1.66637	0.977066	0.514274			1.66637	0.977066		0.387402	0.228583	0.559401	0.169765	0.484416
				0.875191								1.21587		2.68629		1.30773	0.508538	0.959407						2.68629		0.649097	0.240742	0.218434	1.01051	0.353069	0.945611	0.610977	0.659976			0.945611	0.610977		0.468508	0.804415	0.16953	0.474288	0.663199
				0.716397								1.6007		0.394111		0.547854	0.170986	0.553886						0.394111		1.0065	0.329515	0.590118	0.499381	0.462029	0.575662	9.79964	0.2307			0.575662	9.79964		0.086946	0.587377	0.5208	0.343818	0.227001
				1.78192								0.95626		2.72832		0.753744	0.3039	1.16551						2.72832		0.518914	0.365734	0.131462	0.146521	0.430815	0.731688	0.718619	0.237796			0.731688	0.718619		0.151359	0.42351	0.352096	0.359078	0.929867
				0.265449								0.193196		0.690969		0.501282	0.523439	0.791547						0.690969		0.966659	0.409269	0.414427	0.141213	0.261503	0.530001	1.35295	0.268026			0.530001	1.35295		0.187858	0.515042	0.254066	0.668777	0.110043
				0.533114								1.10638		1.37203		1.91558	0.743037	0.326659						1.37203		0.862332	1.1388	0.112636	0.35005	0.47846	2.42261	4.3112	0.287844			2.42261	4.3112		0.513771	0.633244	0.211686	0.971445	0.247506
				0.555235								2.63651		0.780359		0.734604	0.323927	0.284422						0.780359		0.96073	0.476259	1.04092	0.235571	0.440421	1.07251	4.06036	0.133371			1.07251	4.06036		0.217094	0.262787	0.45556	0.347283	0.492306
				1.58435								0.898326		2.66547		2.63944	0.394384	1.0041						2.66547		1.03627	0.456891	0.281133	0.387402	0.308204	1.47207	4.71802	0.06867			1.47207	4.71802		0.7321	0.255852	0.202302	0.288721	0.640796
				0.758007								0.738632		2.30649		1.14629	0.346759	1.37337						2.30649		2.34276	0.785575	1.30992	0.468508	1.11126	0.871281	0.581969	0.21705			0.871281	0.581969		1.37086	0.136945	0.264913	0.315222	0.119028
				1.51281								1.0292		0.274676		1.73223	0.407981	0.979176						0.274676		1.05374	0.666039	0.23544	0.086946	0.530071	0.970254	0.868917	0.09846			0.970254	0.868917		0.182953	0.116205	0.496878	0.472285	0.208895
				1.11319								1.40008		1.76737		1.35997	0.360464	0.720061						1.76737		0.651472	0.897503	0.202201	0.151359	0.330637	1.3823	1.13353	0.574931			1.3823	1.13353		0.207399	0.578304	0.152791	0.380588	0.764621
				0.200225								0.996756		2.01003		0.505778	0.851425	0.769395						2.01003		0.407701	0.392009	0.555282	0.187858	0.145102	2.40622	1.45123	0.212683			2.40622	1.45123		0.48847	0.259711	1.28681	0.463801	0.685307
				0.723052								0.475734		1.91842		1.58707	0.183589	0.575608						1.91842		2.28618	0.722904	0.442838	0.513771	0.508728	0.772434	0.460775	0.133713			0.772434	0.460775		0.719685	0.837877	0.402007	0.197097	0.404013
				5.4613								1.14536		3.40864		1.52902	1.59606	0.218434						3.40864		1.21618	0.328662	0.731235	0.217094	0.828019	2.502	1.33842	0.769227			2.502	1.33842		1.04653	0.456988	0.19797	0.407753	0.107011
				0.743434								0.824442		2.95072		1.19562	1.00194	0.590118						2.95072		0.698509	0.857668	1.444	0.7321	0.259721	1.67365	2.10681	0.140526			1.67365	2.10681		1.16006	0.595386	0.178037	0.477105	1.00016
				5.36844								0.75672		1.45551		0.864558	0.202048	0.131462						1.45551		3.50751	0.946761		1.37086	0.525947	4.69043	3.00402	1.90106			4.69043	3.00402		0.773137	0.348148	0.265962	0.463298	0.51197
				1.21587								1.05467		0.908147		0.225091	0.765949	0.414427						0.908147		1.75543	1.42464		0.182953	0.840123	0.882519	5.75815	0.106526			0.882519	5.75815		0.824554	1.04747	0.702633	0.278805	0.370355
				1.6007								0.788119		2.74029		0.967791	0.520718	0.112636						2.74029		1.06391	1.16967		0.207399	0.205748	1.3012	5.80817	0.130139			1.3012	5.80817		0.854231	0.225466	0.093211	0.153041	0.474555
				0.95626								0.888401		1.85665		0.565855	0.454003	1.04092						1.85665		1.68266	0.633138		0.48847	0.29975	3.28276	0.55732	0.130678			3.28276	0.55732		1.01771	1.0803	0.497439	0.26459	0.264341
				0.193196								0.692125		0.539232		1.15621	1.97532	0.281133						0.539232		0.715124	1.90569		0.719685	0.256193	1.43456	1.1314	0.1296			1.43456	1.1314		1.14656	0.18475	2.44195	0.356743	0.159907
				1.10638								0.686006		0.674188		0.781437	1.54973	1.30992						0.674188		1.18274	0.239136		1.04653	0.380127	0.284221	1.45358	0.624778			0.284221	1.45358		1.11018	0.769111	0.553682	0.711742	0.125839
				2.63651								0.64674		1.06231		0.525322	0.271988	0.23544						1.06231		0.914014	0.360116		1.16006	1.07049	2.88987	1.28427	0.361435			2.88987	1.28427		1.89949	0.454203	0.21184	0.300886	0.150291
				0.898326								0.73309		2.64968		0.965367	1.86628	0.202201						2.64968		1.10475	0.359261		0.773137	0.194558	6.97401	2.22112	0.330417			6.97401	2.22112		1.30439	0.179687	0.249388	0.1588	0.868001
				0.738632								2.94103		1.48921		1.03599	0.943473	0.555282						1.48921		0.61586	0.332256		0.824554	0.079649	1.05994	2.40453	0.094133			1.05994	2.40453		0.671889	0.068291	0.733479	0.297624	0.461894
				1.0292								2.15397		6.95329		1.84031	0.773516	0.442838						6.95329		0.181661	1.06155		0.854231	0.333974	3.27079	2.25604	0.132481			3.27079	2.25604		0.465708	0.086006	1.2427	0.290412	0.186535
				1.40008								1.03933		0.638605		0.744628	0.345029	0.731235						0.638605		0.483939	2.3586		1.01771	0.165894	2.88564	15.3342	0.313867			2.88564	15.3342		0.193371	0.786696	0.250177	1.03256	1.01569
				0.996756								0.864092		2.54624		0.826232	0.573225	1.444						2.54624		0.914513	0.397046		1.14656	0.453676	2.30501	1.06939	0.586671			2.30501	1.06939		0.83856	0.440935	0.25897	0.166731	0.202574
				0.475734								1.0048		0.739117		0.451	0.575898							0.739117		0.648995	0.178071		1.11018	0.528134	2.10652	0.401359	0.522349			2.10652	0.401359		0.75617	0.713819	0.371532	0.535373	0.101175
				1.14536								0.781998		3.92899		0.463341	0.36927							3.92899		0.709446	1.17273		1.89949	0.27582	2.45457	1.31822	0.099403			2.45457	1.31822		1.10005	0.457037	0.454064	0.308473	0.314641
				0.824442								1.14241		2.60596		1.65464	0.294809							2.60596		0.856097	0.350053		1.30439	0.306915	0.890999	7.36489	0.579089			0.890999	7.36489		0.648049	0.601588	0.785502	0.174241	0.620521
				0.75672								1.09967		1.2946		0.779611	0.274482							1.2946		2.34318	0.423682		0.671889	0.37321	2.02654	1.31199	0.194376			2.02654	1.31199		1.04084	0.338039	0.313819	0.542079	0.674526
				1.05467								1.13864		5.73609		0.41777	0.429691							5.73609		0.68008	0.600025		0.465708	0.099508	1.45274	0.377795	0.111616			1.45274	0.377795		0.85489	0.334732	0.079491	0.338841	0.576082
				0.788119								0.449551		0.866738		0.983754	0.693082							0.866738		0.14616	0.469265		0.193371	0.097101	1.26877	3.94288	0.19844			1.26877	3.94288		0.544566	0.169628	0.196458	0.272877	0.401704
				0.888401								0.316027		0.834808		0.9217	1.22562							0.834808		1.57009	1.23341		0.83856	0.392036	0.519352	1.10599	0.163124			0.519352	1.10599		0.60699	0.232468	0.44365	0.297931	0.278146
				0.692125								0.420506		2.31766		0.559151	0.285865							2.31766		0.884352	1.3349		0.75617	0.70043	1.35824	2.92812	0.087506			1.35824	2.92812		0.475589	0.469726	0.677485	0.303097	0.169884
				0.686006								0.479952		7.36347		0.736124	2.02831							7.36347		1.9246	0.548399		1.10005	0.274541	2.51503	2.2613	0.286822			2.51503	2.2613		2.30674	0.431039	1.00652	0.328165	0.188279
				0.64674								0.455685		3.28033		0.608548	0.270268							3.28033		0.968162	0.274717		0.648049	0.600554	6.4917	0.876749	0.20112			6.4917	0.876749		2.06006	0.953325	0.515722	0.238278	0.232431
				0.73309								0.340225		1.58669		0.757404	1.44528							1.58669		1.33003	0.874056		1.04084	0.209001	0.488562	1.85713	0.472275			0.488562	1.85713		1.49862	0.56708	0.541153	0.106121	0.725944
				2.94103								1.26115		2.26367		0.488128	0.504036							2.26367		0.805027	1.00219		0.85489	0.405168	1.49357	5.45489	0.137944			1.49357	5.45489		0.48276	0.62725	0.580838	0.089839	0.354546
				2.15397								0.903685		2.57574		2.42603	0.774823							2.57574		1.0118	1.4835		0.544566	0.255412	0.877324	0.911798	0.113557			0.877324	0.911798		0.479447	1.13152	0.130612	0.122201	0.710681
				1.03933								2.22732		0.802938		1.12444	0.912475							0.802938		0.714507	0.653917		0.60699	0.19032	1.92361	5.71228	0.071682			1.92361	5.71228		0.445655	0.779843	0.235536	0.186084	0.281533
				0.864092								0.498511		0.956319		1.22433	0.152795							0.956319		0.676871	0.876545		0.475589	0.476781	1.31983	5.90259	0.121559			1.31983	5.90259		3.38376	1.84362	0.821374	0.250697	0.259318
				1.0048								2.43429		0.821962		1.02932	0.834862							0.821962		0.620998	0.80961		2.30674	0.394158	0.736132	1.91688	0.177635			0.736132	1.91688		0.918481	0.602126	0.270308	0.170702	0.226127
				0.781998								0.605562		1.10985		1.18788	0.240742							1.10985		0.276151	0.759471		2.06006	1.28121	1.61974	1.11229	0.365171			1.61974	1.11229		0.756168	0.133773	0.499724	0.201329	0.380712
				1.14241								0.794718		0.570817		0.95932	0.329515							0.570817		2.31528	0.705334		1.49862	0.640932	0.68938	1.15522	0.363035			0.68938	1.15522		1.14983	0.181286	0.231195	0.202781	0.465381
				1.09967								3.84525		1.68545		1.57274	0.365734							1.68545		1.52551	0.678033		0.48276	0.228583	0.675852	1.412	0.111179			0.675852	1.412		0.364868	0.386875	0.425809	0.231935	0.553981
				1.13864								2.86062		1.17478		0.478881	0.409269							1.17478		0.669177	0.501507		0.479447	0.804415	1.13868	1.64992	1.0831			1.13868	1.64992		0.329224	0.337336	0.636887	0.506977	0.66842
				0.449551								0.401255		1.3824		0.721638	1.1388							1.3824		0.706297	1.83901		0.445655	0.587377	1.44313	1.13793	0.273201			1.44313	1.13793		1.07725	0.611735	0.789056	0.499004	0.479506
				0.316027								1.17393		3.30681		1.91301	0.476259							3.30681		0.596825	0.831008		3.38376	0.42351	2.08243	0.545152	0.138324			2.08243	0.546903		1.26672	0.191949	0.56081	0.470646	0.308044
				0.420506								0.788583		0.961001		1.28798	0.456891							0.961001		0.907092	0.378486		0.918481	0.515042	1.14499	1.01004	0.52157			1.14499	1.01004		0.968138	0.347039	0.932868	0.594434	0.36599
				0.479952								0.469858		0.854879		0.828244	0.785575							0.854879		2.77752	0.420444		0.756168	0.633244	1.34514	1.7581	0.132252			1.34514	1.7581		1.23904	0.33197	0.32533	0.647514	0.150632
				0.455685								0.567093		1.34917		0.918954	0.666039							1.34917		0.606571	0.991383		1.14983	0.262787	2.69826	1.37095	0.116521			2.69826	1.37095		0.331501	0.823635	0.996903	0.379901	0.272634
				0.340225								0.300342		6.4143		1.34818	0.897503							6.4143		0.896593	0.239726		0.364868	0.255852	1.46079	1.15789	1.17393			1.46079	1.15789		2.02955	0.691423	0.130751	0.46517	0.402851
				1.26115								0.790651		4.78416		0.631016	0.392009							4.78416		0.67677	0.805165		0.329224	0.136945	0.867206	0.916012	1.05201			0.867206	0.916012		2.01463	0.392409	0.694026	0.842934	0.279539
				0.903685								0.40449		1.61132		2.41359	0.722904							1.61132		0.962967	0.406682		1.07725	0.116205	0.982716	0.513838	0.421002			0.982716	0.513838		5.48804	0.367602	0.452492	0.65396	0.146413
				2.22732								0.630913		1.4486		1.25009	0.328662							1.4486		0.504005	0.715265		1.24451	0.578304	1.24856	2.31269	0.234323			1.24856	2.31269		0.769521	0.394733	0.522921	0.287591	0.137872
				0.498511								2.42049		6.48295		0.698684	0.857668							6.48295		0.512003	0.954343		0.968138	0.259711	0.718707	0.605433	0.598414			0.718707	0.605433		2.98168	0.66418	0.382307	2.56352	0.143657
				2.43429								0.717651		2.77634		1.20462	0.946761							2.77634		0.645862	1.8249		1.23904	0.837877	0.643076	1.77396	0.47533			0.643076	1.77396		0.16841	0.196218	0.25099	0.892002	0.168027
				0.605562								3.25557		1.98701		1.01738	1.42464							1.98701		0.407625	1.64688		0.331501	0.456988	1.10583	2.42464	0.676827			1.10583	2.42464		0.367337	0.160147	0.227948	0.466928	0.638018
				0.794718								4.8001		1.54166		5.3897	1.16967							1.54166		0.418729	0.517393		2.02955	0.595386	1.62279	4.4007	0.515608			1.62279	4.4007		0.340372	1.01883	0.418008	0.287179	0.394568
				3.84525								0.839643		1.17396		1.10653	0.633138							1.17396		1.17779	0.416742		2.01463	0.348148	0.975617	0.858438	0.402099			0.975617	0.858438		0.520882	0.133541	0.427749	0.166732	0.502032
				2.86062								0.467739		3.64654		0.708275	1.90569							3.64654		1.1059	1.52293		5.48804	1.04747	1.81827	1.11459	0.507843			1.81827	1.11459		1.95379	0.493568	0.217533	0.120409	0.400526
				0.401255								0.253277		1.58409		1.55684	0.239136							1.58409		0.47928	0.093387		0.769521	0.225466	0.479653	0.998376	0.110838			0.479653	0.998376		1.86738	0.551099	0.430567	0.973246	0.473971
				1.17393								0.698443		1.89283		0.459462	0.360116							1.89283		0.482329	1.27289		2.98168	1.0803	1.68784	2.64792	0.350213			1.68784	2.64792		0.196507	0.204149	0.692862	0.129304	0.488691
				0.788583								0.654775		1.89373		1.33933	0.359261							1.89373		0.465448	0.881024		0.16841	0.18475	2.14668	0.230298	0.236593			2.14668	0.230298		0.215579	0.179601	0.180183	0.127155	0.09629
				0.469858								0.548986		0.785176		1.77234	0.332256							0.785176		0.696552	0.792682		0.367337	0.769111	2.32201	2.78081	0.339972			2.32201	2.78081		0.346091	0.349557	0.390422	0.329586	0.443753
				0.567093								0.327564		0.803239		1.12438	1.06155							0.803239		0.523767	0.802943		0.340372	0.454203	0.648695	1.64982	0.107072			0.648695	1.64982		1.25529	0.398535	0.089108	0.439998	0.099192
				0.300342								0.914797		2.44005		0.448696	2.3586							2.44005		0.451881	1.08339		0.520882	0.179687	3.60854	1.90091	0.338032			3.60854	1.90091		1.23897	0.164199	0.316356	0.164363	0.389744
				0.790651								0.124663		2.12725		1.22215	0.397046							2.12725		0.733676	0.954418		1.95379	0.068291	0.943576	1.26342	1.28718			0.943576	1.26342		0.281001	0.086137	0.18825	0.490372	0.36372
				0.40449								1.02703		3.78375		0.955427	0.178071							3.78375		1.97795	0.475586		1.86738	0.086006	5.12741	1.26178	0.610444			5.12741	1.26178		1.42572	0.137349	1.53153	0.744633	0.201913
				0.630913								1.39125		1.9784		0.955298	1.17273							1.9784		1.02869	0.300788		0.196507	0.786696	2.34554	1.55867	0.086231			2.34554	1.55867		0.336344	0.579134	0.558723	0.192186	0.389128
				2.42049								0.414358		0.770584		1.95312	0.350053							0.770584		0.298356	1.04694		0.215579	0.440935	1.51746	0.862948	0.225083			1.51746	0.862948		1.30048	0.17446	0.270471	0.12321	0.277766
				0.717651								1.03604		2.02146		0.873078	0.423682							2.02146		0.816373	0.557465		0.346091	0.713819	1.91924	0.653703	0.12561			1.91924	0.653703		1.57571	0.366695	0.643633	0.220121	0.133749
				3.25557								0.815481		0.674734		1.5704	0.600025							0.674734		1.79065	0.811989		1.25529	0.457037	1.61884	2.7566	0.248176			1.61884	2.7566		2.1098	0.224581	0.532403	0.267077	0.158607
				4.8001								2.85559		0.33892		0.796417	0.469265							0.33892		1.41941	0.207539		1.23897	0.601588	3.58026	1.0242	0.18588			3.58026	1.0242		0.851174	0.403616	0.334551	1.15222	0.204507
				0.839643								3.99138		0.345711		0.540137	1.23341							0.345711		1.31042	1.02785		0.281001	0.338039	2.20253	4.17252	0.173811			2.20253	4.17252		0.515753	0.404076	1.00511	0.232128	0.39565
				0.467739								0.874866		0.875152		0.649097	1.3349							0.875152		0.887851	0.456107		1.42572	0.334732	2.35025	2.99688	0.259717			2.35025	2.99688		0.727555	0.547255	0.449737	0.24464	0.319876
				0.253277								1.09553		1.32942		1.0065	0.548399							1.32942		0.194017	0.185833		0.336344	0.169628	6.90393	0.397076	0.155536			6.90393	0.397076		1.54585	0.244338	0.476204	0.772675	0.176898
				0.698443								4.5286		2.96645		0.518914	0.274717							2.96645		0.724187	0.302239		1.30048	0.232468	1.01448	1.04608	0.429784			1.01448	1.04608		0.545018	0.185885	0.408357	0.366298	0.308549
				0.654775								0.516041		0.449126		0.966659	0.874056							0.449126		0.567438	0.316962		1.57571	0.469726	1.03923	1.39422	0.938933			1.03923	1.39422		1.00541	0.385789	0.677451	0.320613	0.240851
				0.548986								0.637296		0.772935		0.862332	1.00219							0.772935		0.639951	0.546261		2.1098	0.431039	0.948443	2.23501	0.092842			0.948443	2.23501		0.550481	0.426753	0.188857	0.239043	0.14538
				0.327564								0.583651		0.604149		0.96073	1.4835							0.604149		0.872234	0.527294		0.851174	0.953325	2.03435	2.80934	0.489984			2.03435	2.80934		0.598447	0.308664	0.756381	0.337543	0.286925
				0.914797								0.670871		0.245201		1.03627	0.653917							0.245201		2.27193	0.686012		0.515753	0.56708	0.346787	2.31383	0.126302			0.346787	2.31383		0.233083	0.21489	0.368634	0.100911	0.258628
				0.124663								0.321806		1.51323		2.34276	0.876545							1.51323		0.939146	0.801128		0.727555	0.62725	0.689757	1.69252	0.168034			0.689757	1.69252		0.623237	0.50266	0.572757	0.364086	0.111378
				1.02703								0.287007		1.9762		1.05374	0.80961							1.9762		0.910644	0.400717		1.54585	1.13152	0.701324	2.29153	0.532029			0.701324	2.29153		0.701029	0.208902	0.231009	0.31992	0.169886
				1.39125								2.65679		2.12678		0.651472	0.759471							2.12678		0.681825	0.262471		0.545018	0.779843	0.70469	0.574396	0.568974			0.70469	0.574396		0.875866	0.1118	0.605264	0.399067	0.228872
				0.414358								0.34781		0.631445		0.407701	0.705334							0.631445		0.367166	0.526574		1.00541	1.84362	4.34211	2.55991	0.266858			4.34211	2.55991		1.39222	0.7485	0.679426	0.103738	0.173181
				1.03604								1.11877		0.150858		2.28618	0.678033							0.150858		0.550576	0.177361		0.550481	0.602126	0.93608	1.61142	0.302842			0.93608	1.61142		0.615142	0.183883	0.81739	0.455169	0.121906
				0.815481								0.84322		0.852029		1.21618	0.501507							0.852029		0.947415	0.315314		0.598447	0.133773	2.02153	1.17714	0.490767			2.02153	1.17714		0.383783	0.135558	0.596916	0.264462	0.316512
				2.85559								1.12171		1.38136		0.698509	1.83901							1.38136		0.542354	0.562954		0.233083	0.181286	3.06761	2.57407	0.600107			3.06761	2.57407		0.705244	0.414726	0.649328	0.139483	0.165094
				3.99138								1.15952		1.95728		3.50751	0.831008							1.95728		0.49677	0.60834		0.623237	0.386875	1.83466	3.76466	1.88813			1.83466	3.76466		0.619907	0.301407	0.333746	0.380507	0.547655
				0.874866								0.395968		1.09936		1.75543	0.378486							1.09936		1.42056	0.190943		0.701029	0.337336	0.623752	1.66957	0.553411			0.623752	1.66957		0.876954	1.45733	0.448583	0.11158	0.620637
				1.09553								0.237068		0.418658		1.06391	0.420444							0.418658		0.765719	2.81489		0.875866	0.611735	1.81936	1.26601	0.26004			1.81936	1.26601		0.789382	0.583853	0.226311	0.254739	0.481627
				4.5286								1.79463		2.48414		1.68266	0.991383							2.48414		0.739377	1.49051		1.39222	0.191949	8.16533	1.71636	0.484416			8.16533	1.71636		0.57203	0.246628	0.39289	0.21406	0.453503
				0.516041								1.04888		5.07606		0.715124	0.239726							5.07606		0.743899	0.765647		0.615142	0.347039	2.9185	0.573419	0.663199			2.9185	0.573419		1.04245	0.447358	0.760108	0.263264	0.487951
				0.637296								0.76354		2.58726		1.18274	0.805165							2.58726		0.469438	0.219081		0.383783	0.33197	2.33157	1.30281	0.227001			2.33157	1.30281		0.156126	1.09733	0.296199	0.518382	0.494707
				0.583651								1.43868		0.5893		0.914014	0.406682							0.5893		0.344876	0.728196		0.705244	0.823635	1.39307	4.10993	0.929867			1.39307	4.10993		0.739125	0.964345	0.24021	0.557937	0.383404
				0.670871								0.848503		0.911724		1.10475	0.715265							0.911724		0.900692	0.389422		0.619907	0.691423	1.77569	1.30364	0.110043			1.77569	1.30364		1.0377	1.45354	0.284165	0.333339	0.335451
				0.321806								0.815399		2.04391		0.61586	0.954343							2.04391		0.727335	0.520944		0.876954	0.392409	1.10743	1.69319	0.247506			1.10743	1.69319		0.998767	0.305912	0.536775	0.184712	0.229595
				0.287007								0.788294		4.45143		0.181661	1.8249							4.45143		1.39134	0.74971		0.789382	0.367602	0.663121	2.02738	0.492306			0.663121	2.02738		1.18384	0.645967	0.188101	0.696483	0.341745
				2.65679								0.271468		1.36356		0.483939	1.64688							1.36356		0.793882	0.764115		0.57203	0.394733	6.74278	1.52742	0.640796			6.74278	1.52742		0.397563	0.336488	0.309829	1.79206	0.373829
				0.34781								0.72287		1.79993		0.914513	0.517393							1.79993		0.844395	0.461135		1.04245	0.66418	2.74105	1.71351	0.119028			2.74105	1.71351		0.107475	1.25828	0.353654	0.352015	0.667938
				1.11877								0.29902		1.3402		0.648995	0.416742							1.3402		0.524008	0.360105		0.156126	0.196218	1.67547	1.80305	0.208895			1.67547	1.80305		0.275575	0.179775	0.277399	0.459583	0.548461
				0.84322								1.27894		1.88135		0.709446	1.52293							1.88135		0.572125	1.28937		0.739125	0.160147	1.01575	0.68721	0.764621			1.01575	0.68721		0.994452	1.42621	0.40233	0.232103	0.498633
				1.12171								0.576488		7.34618		0.856097	0.093387							7.34618		0.523364	1.07995		1.0377	1.01883	2.43596	1.23672	0.685307			2.43596	1.23672		0.604733	0.213202	0.191889	0.161325	0.322411
				1.15952								1.46957		3.1283		2.34318	1.27289							3.1283		0.165555	1.12108		0.998767	0.133541	2.18615	2.14419	0.404013			2.18615	2.14419		0.461726	2.48502	0.049186	0.932713	0.276877
				0.395968								3.39782		3.82315		0.68008	0.881024							3.82315		0.543838	1.50403		1.18384	0.493568	1.75175	0.853425	0.107011			1.75175	0.853425		1.39951	0.606811	0.377387	0.138182	0.149765
				0.237068								2.4799		3.37127		0.14616	0.792682							3.37127		0.818115	0.393702		0.397563	0.551099	2.26885	0.871736	1.00016			2.26885	0.871736		0.872287	0.835716	0.177472	0.146574	0.169475
				1.79463								0.594655		0.934368		1.57009	0.802943							0.934368		1.86972	0.966639		0.107475	0.204149	2.01031	1.31005	0.51197			2.01031	1.31005		0.626164	0.391908	0.618847	0.495142	0.109523
				1.04888								0.707009		0.271731		0.884352	1.08339							0.271731		0.982506	0.731813		0.275575	0.179601	2.19572	1.3786	0.370355			2.19572	1.3786		0.233307	0.804196	0.248659	0.220367	0.223678
				0.76354								2.09216		6.49387		1.9246	0.954418							6.49387		0.747394	0.368385		0.994452	0.349557	1.33504	1.72962	0.474555			1.33504	1.72962		1.62671	1.12091	0.811537	0.716201	0.414823
				1.43868								0.373839		3.81573		0.968162	0.475586							3.81573		0.337901	0.290736		0.604733	0.398535	2.49224	1.52588	0.264341			2.49224	1.52588		1.48005	0.967278	0.265658	0.150213	0.240721
				0.848503								0.571786		4.25543		1.33003	0.300788							4.25543		0.400378	0.731711		0.461726	0.164199	1.58558	1.35767	0.159907			1.58558	1.35767		1.03389	0.688703	0.207139	0.198765	0.391358
				0.815399								0.819316		0.908807		0.805027	1.04694							0.908807		1.55063	0.72221		1.39951	0.086137	4.14279	1.5432	0.125839			4.14279	1.5432		1.56162	0.533036	0.105849	0.471885	0.527799
				0.788294								1.01841		1.16481		1.0118	0.557465							1.16481		0.505876	0.233427		0.872287	0.137349	1.3255	2.63582	0.150291			1.3255	2.63582		0.578555	0.432211	0.126189	0.196119	0.570034
				0.271468								0.916019		1.74388		0.714507	0.811989							1.74388		4.0084	0.197154		0.626164	0.579134	0.876846	1.09425	0.868001			0.876846	1.09425		0.866193	1.14228	0.15728	0.173235	0.665553
				0.72287								0.374611		2.71543		0.676871	0.207539							2.71543		0.797431	0.631237		0.233307	0.17446	3.70465	1.3089	0.461894			3.70465	1.3089		0.957858	0.866871	0.083954	0.389641	0.816034
				0.29902								1.43834		3.42181		0.620998	1.02785							3.42181		0.924491	0.434808		1.62671	0.366695	4.70143	0.720617	0.186535			4.70143	0.720617		1.50417	0.320596	0.249301	0.15044	0.441508
				1.27894								1.70333		3.67425		0.276151	0.456107							3.67425		1.20278	0.891529		1.48005	0.224581	1.12952	0.594974	1.01569			1.12952			0.556258	0.263412	0.236172	0.53211	0.457655
				0.576488								2.78092		6.7353		2.31528	0.185833							6.7353		0.647472	0.180486		1.03389	0.403616	1.27157	0.240806	0.202574			1.27157			2.87753	0.816755	0.384036	0.693773	0.218102
				1.46957								1.57218		0.453511		1.52551	0.302239							0.453511		0.836105	1.83546		1.56162	0.404076	1.10645	0.590666	0.101175			1.10645			1.08609	0.221098	0.165865	0.69769	1.58035
				3.39782								0.669867		1.9712		0.669177	0.316962							1.9712		0.37207	0.3742		0.578555	0.547255	1.48737	0.260746	0.314641			1.48737			1.28353	0.133041	0.406248	0.3748	0.205186
				2.4799								0.610751		3.74242		0.706297	0.546261							3.74242		0.957481	0.489886		0.866193	0.244338	2.44009	0.289261	0.620521			2.44009			0.117162	0.319821	0.297062	0.165944	0.122161
				0.594655								0.885938		1.54294		0.596825	0.527294							1.54294		0.949498	0.466219		0.957858	0.185885	1.12814	0.112626	0.674526			1.12814			0.269125	0.32762	0.411445	0.250958	0.326861
				0.707009								1.75936		2.20533		0.907092	0.686012							2.20533		1.18514	0.360321		1.50417	0.385789	3.90296	0.536143	0.576082			3.90296			0.627935	0.128366	0.89085	0.28638	0.202837
				2.09216								0.812309		1.4805		2.77752	0.801128							1.4805		0.651312	0.556763		0.556258	0.426753	0.776594	0.250393	0.401704			0.776594			0.982749	0.366161	1.54367	0.13137	0.371693
				0.373839								0.720474		1.01981		0.606571	0.400717							1.01981		0.883236	0.48028		2.87753	0.308664	4.76126	0.291875	0.278146			4.76126			0.926038	0.557961	0.160123	1.20953	0.226572
				0.571786								2.15643		1.21116		0.896593	0.262471							1.21116		0.788702	0.272879		1.08609	0.21489	1.56766	0.427337	0.169884			1.56766			0.761675	1.26649	0.163438	0.37113	0.447363
				0.819316								0.901017		0.56448		0.67677	0.526574							0.56448		0.919257	0.888889		1.28353	0.50266	1.37531	0.462527	0.188279			1.37531			0.442164	0.290509	0.497469	0.608607	0.180886
				1.01841								2.78145		0.914712		0.962967	0.177361							0.914712		0.233205	0.950961		0.117162	0.208902	0.368356	1.09649	0.232431			0.368356			0.986266	0.723561	0.502799	0.33457	0.168742
				0.916019								1.17797		2.2825		0.504005	0.315314							2.2825		0.333685	0.344932		0.269125	0.1118	1.18716	0.092184	0.725944			1.18716			0.299951	0.631947	0.782911	0.098399	0.322878
				0.374611								4.48125		1.01355		0.512003	0.562954							1.01355		0.413359	0.65155		0.627935	0.7485	1.26837	0.408098	0.354546			1.26837			0.191881	1.24635	0.09447	0.263787	0.283104
				1.43834								2.84328		0.404024		0.645862	0.60834							0.404024		0.204323	0.615223		0.982749	0.183883	2.24298	0.210568	0.710681			2.24298			0.976711	1.15369	1.10835	0.246811	0.113008
				1.70333								0.651783		1.69033		0.407625	0.190943							1.69033		0.473502	1.87076		0.926038	0.135558	1.14305	0.521358	0.281533			1.14305			1.18794	0.854921	1.04063	0.524441	0.118032
				2.78092								0.535295		0.846997		0.418729	2.81489							0.846997		0.948643	0.394904		0.761675	0.414726	1.51478	0.267335	0.259318			1.51478			1.23346	0.682421	0.151663	0.215324	0.353517
				1.57218								2.0564		1.68583		1.17779	1.49051							1.68583		0.622597	0.746957		0.442164	0.301407	0.475272	0.357777	0.226127			0.475272			1.75459	0.989497	0.836427	0.054195	0.244839
				0.669867								0.830576		4.68128		1.1059	0.765647							4.68128		0.692844	0.481281		0.986266	1.45733	0.55221	0.215935	0.380712			0.55221			1.80047	0.872836	0.130896	0.721268	0.632324
				0.610751								1.48541		0.661625		0.47928	0.219081							0.661625		0.663701	0.651592		0.299951	0.583853	0.67699	0.2963	0.465381			0.67699			0.699698	0.449787	0.408286	0.529238	0.248086
				0.885938								0.968012		0.982662		0.482329	0.728196							0.982662		0.846451	0.856591		0.191881	0.246628	1.51805	0.318865	0.553981			1.51805			1.92953	0.0869	0.351081	0.799711	0.382544
				1.75936								2.84554		2.47958		0.465448	0.389422							2.47958		0.627473	0.215897		0.976711	0.447358	1.37805	1.97585	0.66842			1.37805			1.9812	0.104808	0.354987	0.200298	0.287793
				0.812309								1.21829		1.24409		0.696552	0.520944							1.24409		0.485127	0.14579		1.18794	1.09733	3.62819	0.207225	0.479506			3.62819			0.348632	0.183942	2.65388	0.22738	0.133171
				0.720474								1.31937		0.992249		0.523767	0.74971							0.992249		0.970564	0.450772		1.23346	0.964345	2.3021	0.173905	0.308044			2.3021			2.15064	0.098633	0.668087	0.310006	0.330142
				2.15643								0.930082		1.883		0.451881	0.764115							1.883		0.425623	1.05148		1.75459	1.45354	1.87971	0.508877	0.36599			1.87971			0.359288	0.075331	0.485583	0.512278	0.231293
				0.901017								0.974874		1.58235		0.733676	0.461135							1.58235		0.622758	0.518661		1.80047	0.305912	0.938455	0.300262	0.150632			0.938455			0.278541	0.121235	0.541	0.43006	0.45684
				2.78145								0.46923		0.987133		1.97795	0.360105							0.987133		0.692868	0.292373		0.699698	0.645967	2.53484	0.361208	0.272634			2.53484			2.17124	0.21303	0.36705	0.747407	0.122502
				1.17797								1.28576		2.57875		1.02869	1.28937							2.57875		0.426608	0.314528		1.92953	0.336488	2.82818	0.246701	0.402851			2.82818			0.234581	0.964859	0.189819	0.586055	0.270136
				4.48125								0.895219		9.91567		0.298356	1.07995							9.91567		0.42293	1.61198		1.9812	1.25828	2.2126	0.361615	0.279539			2.2126			1.89401	0.341905	0.614306	0.06792	0.318224
				2.84328								0.227085		5.16991		0.816373	1.12108							5.16991		0.175019	0.690299		0.348632	0.179775	1.06697	0.31059	0.146413			1.06697			0.425204	0.483683	1.5609	0.124659	0.212653
				0.651783								0.680126		2.7732		1.79065	1.50403							2.7732		1.05858	0.433788		2.15064	1.42621	0.673274	0.460822	0.137872			0.673274			0.696664	0.49838	0.205525	0.243953	0.464864
				0.535295								0.894801		1.71843		1.41941	0.393702							1.71843		0.534172	0.38422		0.359288	0.213202	2.3391	0.777061	0.143657			2.3391			0.544313	0.482392	0.423946	0.316627	0.227297
				2.0564								0.811766		1.23818		1.31042	0.966639							1.23818		0.54055	1.2265		0.278541	2.48502	0.548739	0.508735	0.168027			0.548739			2.33712	1.11533	0.299896	0.292997	0.170933
				0.830576								2.07198		1.17458		0.887851	0.731813							1.17458		0.529484	0.254195		2.17124	0.606811	1.30424	0.358957	0.638018			1.30424			2.32487	0.271351	0.672455	0.174046	0.145835
				1.48541								0.617635		4.57736		0.194017	0.368385							4.57736		0.535966	0.108551		0.234581	0.835716	1.4566	0.523195	0.394568			1.4566			0.643041	0.430352	0.473083	1.60508	0.124834
				0.968012								4.08672		1.31794		0.724187	0.290736							1.31794		0.417143	1.71098		1.89401	0.391908	1.40508	0.373839	0.502032			1.40508			2.36517	0.930531	0.232118	0.081538	0.207055
				2.84554								1.75587		7.16474		0.567438	0.731711							7.16474		2.88723	1.11679		0.425204	0.804196	1.37927	0.691136	0.400526			1.37927			2.29538	0.610617	0.352848	0.4232	0.434435
				1.21829								3.98074		3.44869		0.639951	0.72221							3.44869		0.420165	0.464449		0.696664	1.12091	0.483733	0.225727	0.473971			0.483733			0.465334	0.531106	0.786291	0.41396	0.609033
				1.31937								0.696446		1.43207		0.872234	0.233427							1.43207		0.665065	0.844983		0.544313	0.967278	0.854436	0.295356	0.488691			0.854436			2.20076	0.319299	1.55083	0.306872	0.346079
				0.930082								0.72765		2.76249		2.27193	0.197154							2.76249		0.407269	0.618328		2.33712	0.688703	1.10658	0.999195	0.09629			1.10658			0.892537	0.207637	0.381328	0.996347	0.811116
				0.974874								5.17244		2.02824		0.939146	0.631237							2.02824		0.786413	0.147361		2.32487	0.533036	1.43989	0.41388	0.443753			1.43989			2.28652	0.185885	0.776755	0.310584	0.721575
				0.46923								2.03781		2.72243		0.910644	0.434808							2.72243		0.708129	0.572601		0.643041	0.432211	0.218304	1.05119	0.099192			0.218304			2.31209	0.447187	0.332574	1.08325	0.614645
				1.28576								2.88962		2.29171		0.681825	0.891529							2.29171		0.793713	0.329354		2.36517	1.14228	3.00983	0.435701	0.389744			3.00983			2.27486	0.212182	0.191193	0.149774	0.14222
				0.895219								1.54838		1.49228		0.367166	0.180486							1.49228		1.04298	0.585349		2.29538	0.866871	1.47789	0.492474	0.36372			1.47789			5.17085	0.56858	0.60225	0.190249	0.2399
				0.227085								0.921731		2.85151		0.550576	1.83546							2.85151		0.76219	0.376576		0.465334	0.320596	1.11023	0.816968	0.201913			1.11023			0.37713	0.40341	0.559988	0.417977	0.179959
				0.680126								1.13833		2.62111		0.947415	0.3742							2.62111		1.17032	0.306493		2.20076	0.263412	0.362734	0.844173	0.389128						2.27879	0.404921	0.185395	1.38626	0.124732
				0.894801								1.25658		0.855968		0.542354	0.489886							0.855968		0.648614	0.830204		0.892537	0.816755	0.48752	1.39741	0.277766						2.26489	0.150497	0.179665	0.201478	0.151398
				0.811766								1.61756		2.04242		0.49677	0.466219							2.04242		0.810305	0.275528		2.28652	0.221098	0.830245	0.390021	0.133749						0.676768	0.314	0.666261	0.120797	0.110592
				2.07198								1.42492		1.04843		1.42056	0.360321							1.04843		1.28892	0.480042		2.31209	0.133041	0.046747	0.652084	0.158607						1.9479	0.389946	0.544627	0.246598	0.499163
				0.617635								2.39453		1.56062		0.765719	0.556763							1.56062		0.563483	0.662679		2.27486	0.319821	0.311598	1.18971	0.204507						0.672806	0.373204	0.287448	2.02499	0.109804
				4.08672								1.88606		5.1784		0.739377	0.48028							5.1784		0.278666	1.04045		5.17085	0.32762	0.253689	0.977357	0.39565						1.42492	0.439072	0.28239	0.624116	0.158493
				1.75587								7.32972		1.18333		0.743899	0.272879							1.18333		0.370511	0.321814		0.37713	0.128366	2.86196	0.173142	0.319876						1.41182	0.149239	0.797425	0.448207	0.275442
				3.98074								3.77637		2.76917		0.469438	0.888889							2.76917		0.842815	0.218906		2.27879	0.366161	0.13948	0.251334	0.176898						1.40713	0.431175	0.236287	0.351336	0.072589
				0.696446								1.60289		2.22932		0.344876	0.950961							2.22932		0.955862	0.421331		2.26489	0.557961	0.522439	0.426408	0.308549						1.37465	0.413576	0.525214	0.307196	0.112643
				0.72765								2.03922		1.85866		0.900692	0.344932							1.85866		0.838512	0.547625		0.676768	1.26649	0.570737	0.577293	0.240851						0.693185	0.736942	0.192716	0.326609	0.076007
				5.17244								2.80762		1.15958		0.727335	0.65155							1.15958		0.638615	0.219399		1.9479	0.290509	0.113653	0.343679	0.14538						1.33609	0.553391	0.130474	0.497086	0.049204
				2.03781								1.80901		0.785476		1.39134	0.615223							0.785476		1.39583	0.869358		0.672806	0.723561	1.92524	0.336724	0.286925						0.093625	0.252662	0.397797	0.478475	0.093243
				2.88962								1.13777		5.72242		0.793882	1.87076							5.72242		0.416761	0.316603		1.42492	0.631947	0.661571	0.536939	0.258628						0.890466	0.239248	0.573013	0.60548	0.225778
				1.54838								1.89882		4.67873		0.844395	0.394904							4.67873		1.05629	0.348144		1.41182	1.24635	0.600989	1.08806	0.111378						2.42918	0.231902	0.740882	0.435759	0.201197
				0.921731								1.77954		1.82313		0.524008	0.746957							1.82313		0.827049	0.465305		1.40713	1.15369	0.089965	0.589978	0.169886						0.087495	0.392119	0.480638	0.539326
				1.13833								1.49593		2.90164		0.572125	0.481281							2.90164		4.43035	0.360301		1.37465	0.854921	0.300601	0.234081	0.228872						2.7318	0.252543	1.61232	0.354033
				1.25658								1.22904		0.648062		0.523364	0.651592							0.648062		1.09842	0.380921		0.693185	0.682421	0.626052	0.834229	0.173181						3.24681	0.619213	0.357451	0.139054
				1.61756								0.351431		1.59423		0.165555	0.856591							1.59423		1.7338	0.286164		1.33609	0.989497	0.200449	0.490023	0.121906						0.157108	0.572629	0.151435	0.701395
				1.42492								1.28641		1.0897		0.543838	0.215897							1.0897		0.25222	0.34391		0.093625	0.872836	0.239756	0.472021	0.316512						0.47573	0.565535	0.478665	0.171827
				2.39453								2.09337		0.407042		0.818115	0.14579							0.407042		0.783207	0.169464		0.890466	0.449787	0.145509	0.311835	0.165094						1.56802	0.216469	0.457758	0.195785
				1.88606								2.71528		5.85281		1.86972	0.450772							5.85281		0.393053	0.262005		2.42918	0.0869	0.109532	0.420568	0.547655						5.31623	0.173464	0.540212	0.42428
				7.32972								2.01873		3.89839		0.982506	1.05148							3.89839		0.311782	0.398888		0.087495	0.104808	0.523502	0.452947	0.620637						0.873665	0.258986	0.886207	0.439084
				3.77637								2.47046		0.806662		0.747394	0.518661							0.806662		0.382784	0.174896		2.7318	0.183942	0.378393	0.891984	0.481627						0.361617	0.863625	0.556208	0.769851
				1.60289								0.540621		2.91879		0.337901	0.292373							2.91879		3.81836	0.16536		3.24681	0.098633	0.429761	0.272602	0.453503						2.78447	0.178858	0.388621	0.878407
				2.03922								5.78254		3.50996		0.400378	0.314528							3.50996		0.791767	0.367087		0.157108	0.075331	0.515444	1.042	0.487951						2.32475	0.217396	0.279748	1.11493
				2.80762								1.51881		3.9466		1.55063	1.61198							3.9466		1.96517	0.382455		0.47573	0.121235	0.127841	0.468812	0.494707						0.716422	0.293558	0.185856	0.727602
				1.80901								1.00331		1.74123		0.505876	0.690299							1.74123		0.836187	0.35243		1.56802	0.21303	0.584462	0.351366	0.383404						1.75278	0.220029	0.422979	0.524489
				1.13777								0.62508		0.950226		4.0084	0.433788							0.950226		0.45361	0.2109		5.31623	0.964859	0.452603	0.30469	0.335451						0.322368	0.381432	0.312681	0.433247
				1.89882								1.23768		1.92205		0.797431	0.38422							1.92205		0.846336	0.239944		0.873665	0.341905	0.270137	0.38537	0.229595						0.190131	0.174986	0.194374	0.20033
				1.77954								0.501127		2.83492		0.924491	1.2265							2.83492		1.63898	0.291422		0.361617	0.483683	0.277754	1.3781	0.341745						0.121105	0.606658	0.310752	0.068111
				1.49593								2.63443		1.75467		1.20278	0.254195							1.75467		0.905399	0.316136		2.78447	0.49838	0.449812	0.56754	0.373829						0.943601	0.351645	0.485048	0.19034
				1.22904								1.37766		1.17125		0.647472	0.108551							1.17125		0.4312	0.393397		2.32475	0.482392	0.226575	0.409589	0.667938						3.44818	0.188909	0.898839	1.18788
				0.351431								0.684854		1.00713		0.836105	1.71098							1.00713		1.29355	0.145256		0.716422	1.11533	0.307784	0.077888	0.548461						2.70761	0.187201	0.159883	0.851284
				1.28641								0.665166		1.05516		0.37207	1.11679							1.05516		0.916421	0.477868		1.75278	0.271351	0.139742	0.127538	0.498633						0.111255	1.55814	0.698925	0.632434
				2.09337								1.39863		0.150512		0.957481	0.464449							0.150512		1.6796	0.421895		0.322368	0.430352	0.110831	0.39519	0.322411						0.937622	0.47364	0.889763	0.31838
				2.71528								1.4096		5.09963		0.949498	0.844983							5.09963		0.357999	0.196674		0.190131	0.930531	0.138637	0.159074	0.276877						0.47802	0.57815	0.232265	0.298136
				2.01873								0.528484		3.40991		1.18514	0.618328							3.40991		1.25769	0.327922		0.121105	0.610617	0.116888	0.53692	0.149765						0.374825	0.331529	0.156129	0.324564
				2.47046								0.867833		1.6999		0.651312	0.147361							1.6999		1.06053	0.405075		0.943601	0.531106	0.471682	0.331671	0.169475						1.08017	0.327402	0.332645	0.472145
				0.540621								0.896482		0.890972		0.883236	0.572601							0.890972		1.32199	0.28317		3.44818	0.319299	0.353464	0.238752	0.109523						0.56575	0.240366	0.464969	0.363934
				5.78254								1.04125		1.12525		0.788702	0.329354							1.12525		1.13085	0.490329		2.70761	0.207637	0.433231	0.253963	0.223678						0.850669	0.383443	0.40113	0.313514
				1.51881								2.076		1.28739		0.919257	0.585349							1.28739		0.298659	0.129187		0.111255	0.185885	0.126423	0.274836	0.414823						1.70599	0.468232	0.590312	0.700836
				1.00331								0.580844		0.875168		0.233205	0.376576							0.875168		2.03384	0.782375		0.937622	0.447187	0.72899	0.198338	0.240721						0.128476	0.437712	0.726748	0.50827
				0.62508								0.730017		2.87713		0.333685	0.306493							2.87713		0.704475	0.254238		0.47802	0.212182	0.25527	0.25662	0.391358						0.193734	1.53507	0.121995	0.520126
				1.23768								1.20413		0.253437		0.413359	0.830204							0.253437		0.931605	0.554568		0.374825	0.56858	0.340039	0.197773	0.527799						0.851681	0.414331	0.205835	0.360499
				0.501127								3.03988		1.38187		0.204323	0.275528							1.38187		2.92518	0.24338		1.08017	0.40341	0.294633	0.83289	0.570034						1.48383	0.261035	0.232934	0.22896
				2.63443								1.16249		0.86417		0.473502	0.480042							0.86417		1.20664	0.200311		0.56575	0.404921	0.500998	0.180866	0.665553						1.07391	0.513439	0.116462	0.248293
				1.37766								0.496304		0.222966		0.948643	0.662679							0.222966		1.97032	0.465911		0.850669	0.150497	0.277688	0.24241	0.816034						3.03083	0.713994	0.360852	0.191454
				0.684854								0.954914		1.08018		0.622597	1.04045							1.08018		1.16714	0.674371		1.70599	0.314	0.196069	0.325953	0.441508						4.35883	1.06071	0.705825	0.459715
				0.665166								0.428405		0.74875		0.692844	0.321814							0.74875		0.818478	0.821634		0.128476	0.389946	0.287119	0.252125	0.457655						0.791976	1.05468	1.43583	0.407796
				1.39863								1.18818		0.479736		0.663701	0.218906							0.479736		0.959	0.392894		0.193734	0.373204	0.770967	0.131735	0.218102						0.990506	0.230078	0.526099	0.818009
				1.4096								0.832149		0.913363		0.846451	0.421331							0.913363		0.958665	0.236963		0.851681	0.439072	0.143052	0.228765	1.58035						1.27579	0.25747	0.300144	0.166197
				0.528484								0.749105		1.22314		0.627473	0.547625							1.22314		0.983167	0.469971		1.48383	0.149239	0.186915	0.309564	0.205186						0.358823	0.110784	0.560246	0.287476
				0.867833								1.42743		0.345551		0.485127	0.219399							0.345551		0.955196	0.510858		1.07391	0.431175	0.157667	0.172635	0.122161						4.5182	0.550806	0.839172	0.102788
				0.896482								0.388547		1.17624		0.970564	0.869358							1.17624		0.415404	0.421473		3.03083	0.413576	0.391077	0.173265	0.326861						0.951573	0.262909	0.371741	0.07781
				1.04125								0.773473		0.494545		0.425623	0.316603							0.494545		0.413397	0.495899		4.35883	0.736942	0.627622	0.672492	0.202837						0.061832	1.82663	0.292338	1.36288
				2.076								0.550513		0.756668		0.622758	0.348144							0.756668		0.245601	0.140603		0.791976	0.553391	0.235221	0.682794	0.371693						0.170702	0.713955	0.419077	0.68225
				0.580844								0.510505		0.898581		0.692868	0.465305							0.898581		0.139317	0.306278		0.990506	0.252662	1.83179	0.297858	0.226572						0.975468	0.283711	0.254893	0.153078
				0.730017								0.640759		2.01961		0.426608	0.360301							2.01961		0.924442	0.268974		1.27579	0.239248	1.22872	0.390608	0.447363						0.331953	1.01817	0.21208	0.711889
				1.20413								0.601005		2.90698		0.42293	0.380921							2.90698		3.14475	0.670936		0.358823	0.231902	0.454582	0.525469	0.180886						0.610685	0.264224	0.429159	0.24085
				3.03988										1.84481		0.175019	0.286164							1.84481		0.753451	0.406285		4.5182	0.392119	0.390169	0.137556	0.168742						0.298971	0.163429	0.293752	0.117773
				1.16249										1.12762		1.05858	0.34391							1.12762		1.13539	0.321378		0.951573	0.252543	0.417636	0.57526	0.322878						0.422588	0.298426	0.560288	0.286972
				0.496304										0.160188		0.534172	0.169464							0.160188		0.476518	0.582724		0.061832	0.619213	0.202179	0.343531	0.283104						0.662341	1.63018	0.17328	0.143819
				0.954914										2.18321		0.54055	0.262005							2.18321		1.07892	0.328481		0.170702	0.572629	0.451965	0.465072	0.113008						0.520143	0.445625	0.567105	0.172764
				0.428405										0.57933		0.529484	0.398888							0.57933		0.778393	0.151477		0.975468	0.565535	0.194368	0.473106	0.118032						0.209919	0.261668	0.376765	0.293779
				1.18818										0.60309		0.535966	0.174896							0.60309		0.951512	0.469717		0.331953	0.216469	0.583863	0.204842	0.353517						0.961176	0.835028	0.444278	0.112062
				0.832149										0.862524		0.417143	0.16536							0.862524		0.784382	0.671345		0.610685	0.173464	0.149098	0.447564	0.244839						1.09468	0.873046	0.226793	0.414535
				0.749105										0.355265		2.88723	0.367087							0.355265		0.293323	0.457812		0.298971	0.258986	0.511072	0.242691	0.632324						0.638777	0.185008	0.2471	0.09756
				1.42743										1.81463		0.420165	0.382455							1.81463		1.58872	0.807397		0.422588	0.863625	0.364936	0.378096	0.248086						0.293592	1.29774	1.21282	0.289631
				0.388547										0.492157		0.665065	0.35243							0.492157		0.179679	1.24078		0.662341	0.178858	0.409888	0.380772	0.382544						0.300234	0.645544	0.286738	0.774255
				0.773473										1.17365		0.407269	0.2109							1.17365		0.228759	0.473023		0.520143	0.217396	0.384097	0.299118	0.287793						0.706679	0.389912	0.380052	1.13261
				0.550513										1.78265		0.786413	0.239944							1.78265		0.427825	0.73857		0.209919	0.293558	0.366021	0.629126	0.133171						0.450265	0.619204	0.478502	0.465591
				0.510505										0.759949		0.708129	0.291422							0.759949		0.218417			0.961176	0.220029	0.6433	0.2139	0.330142						0.344904	0.438417	0.302933	0.092548
				0.640759										2.03017		0.793713	0.316136							2.03017		1.01335			1.09468	0.381432	0.672199	0.275468	0.231293						2.85674	0.346513	0.502399	1.94261
				0.601005										0.647225		1.04298	0.393397							0.647225		0.445581			0.638777	0.174986	0.308327	0.127067	0.45684						1.46723	0.242967	0.210194	0.564994
														2.12465		0.76219	0.145256							2.12465		0.58203			0.293592	0.606658	0.240743	0.283406	0.122502						5.40612	0.31165	0.36107	0.463395
														2.25233		1.17032	0.477868							2.25233		0.546807			0.300234	0.351645	0.410601	0.131546	0.270136						4.44654	0.319769	0.665356	0.82623
														1.21976		0.648614	0.421895							1.21976		1.20182			0.706679	0.188909	0.215578	0.219325	0.318224						0.161266	0.236044	0.437512	0.146914
														0.935684		0.810305	0.196674							0.935684		0.721309			0.450265	0.187201	0.119809	0.265821	0.212653						0.257961	0.211799	0.094597	0.121171
														1.86863		1.28892	0.327922							1.86863		0.888903			0.344904	1.55814	1.3414	0.376143	0.464864						0.256963	0.261655	0.169215	0.137227
														2.0739		0.563483	0.405075							2.0739		1.33587			2.85674	0.47364	0.415015	0.128053	0.227297						2.82469	0.248907	0.776934	0.418266
														1.13408		0.278666	0.28317							1.13408		0.430882			1.46723	0.57815	0.992513	0.30023	0.170933						0.171407	0.24167	0.193565	0.212368
														0.389266		0.370511	0.490329							0.389266		0.669621			5.40612	0.331529	0.393339	0.164177	0.145835						1.77596	0.185552	0.565602	0.340786
														5.80876		0.842815	0.129187							5.80876		0.673519			4.44654	0.327402	0.377286	0.30891	0.124834						0.783823	0.4387	0.307866	0.41721
														0.934213		0.955862	0.782375							0.934213		0.364417			0.161266	0.240366	1.38433	0.118861	0.207055						1.54267	0.608382	0.369739	1.25836
														3.3484		0.838512	0.254238							3.3484		0.351066			0.257961	0.383443	0.420355	0.073652	0.434435						0.234089	0.219205	0.454818	0.485235
														3.44804		0.638615	0.554568							3.44804		0.597061			0.256963	0.468232	0.515716	0.066333	0.609033						0.340016	0.882223	0.271431	0.665654
														1.12569		1.39583	0.24338							1.12569		0.856448			2.82469	0.437712	0.212453	0.066323	0.346079						3.56553	0.565703	0.190232	0.188528
														1.10554		0.416761	0.200311							1.10554		0.717192			0.171407	1.53507	0.541215	0.271036	0.811116						0.797182	0.130532	0.119091	0.150138
														1.97261		1.05629	0.465911							1.97261		0.56709			1.77596	0.414331	0.229255	0.334888	0.721575						2.65113	0.732187	0.437147	0.111278
														1.82233		0.827049	0.674371							1.82233		0.985573			0.783823	0.261035	0.331379	0.31991	0.614645						2.51586	0.317158	0.432138	0.564075
														0.69439		4.43035	0.821634							0.69439		0.999051			1.54267	0.513439	0.206567	0.30834	0.14222						0.11715	0.371586	0.267858	0.62677
														10.3334		1.09842	0.392894							10.3334		0.679937			0.234089	0.713994	0.575915	0.101566	0.2399						0.970741	0.165302	0.379573	1.11397
														1.66223		1.7338	0.236963							1.66223		0.635023			0.340016	1.06071	0.217811	0.393285	0.179959						0.373647	0.142019	0.492575	0.236973
														4.19126		0.25222	0.469971							4.19126		0.457181			3.56553	1.05468	0.483725	0.346647	0.124732						2.0171	0.241469	0.18475	0.801274
														0.893121		0.783207	0.510858							0.893121		1.71265			0.797182	0.230078	0.211509	0.694144	0.151398						0.565581	0.255622	0.503506	1.25623
														2.1807		0.393053	0.421473							2.1807		0.094765			2.65113	0.25747	1.9221	0.15101	0.110592						0.233835	0.440366	0.319615	0.199678
														1.04957		0.311782	0.495899							1.04957		0.214124			2.51586	0.110784	2.10365	0.286991	0.499163						0.361337	1.02558	0.260223	0.315792
														1.15084		0.382784	0.140603							1.15084		0.894639			0.11715	0.550806	0.728545	0.26284	0.109804						0.757004	0.13242	0.237928	0.638143
														6.42673		3.81836	0.306278							6.42673		0.662167			0.970741	0.262909	0.699218	0.220006	0.158493						0.816604	0.146595	0.350832	0.221466
														1.0929		0.791767	0.268974							1.0929		0.300502			0.373647	1.82663	0.612203	0.213536	0.275442						1.07906	0.175233	0.325327	0.13228
														4.57954		1.96517	0.670936							4.57954		0.645464			2.0171	0.713955	0.512927	0.336546	0.072589						0.986392	0.13985	0.224728	0.381601
														2.25014		0.836187	0.406285							2.25014		0.871314			0.565581	0.283711	0.401995	0.413493	0.112643						0.58287	0.086549	0.739919	0.232724
														5.98151		0.45361	0.321378							5.98151		0.961062			0.233835	1.01817	0.284143	0.134704	0.076007						1.09338	0.363442	0.481537	1.10464
														1.2719		0.846336	0.582724							1.2719		0.550635			0.361337	0.264224	0.300049	0.200921	0.049204						1.16318	0.202825	0.121711	0.752507
														0.308457		1.63898	0.328481							0.308457		0.21696			0.757004	0.163429	0.474213	0.822401	0.093243						0.197788	0.202928	0.189659	0.265311
														1.14852		0.905399	0.151477							1.14852		0.366662			0.816604	0.298426	0.335958	0.286293	0.225778						0.47978	0.221209	0.672397	0.132167
														1.49387		0.4312	0.469717							1.49387		0.305698			1.07906	1.63018	0.221551	0.501624	0.201197						0.458688	0.078079	1.44925	0.65435
														2.23751		1.29355	0.671345							2.23751		0.178554			0.986392	0.445625	0.42938	0.482536							0.395906	0.183503	0.714622	0.508311
														3.5758		0.916421	0.457812							3.5758		0.885283			0.58287	0.261668	0.262646	0.655288							1.36586	0.203778	0.73143	0.80713
														0.132662		1.6796	0.807397							0.132662		0.913915			1.09338	0.835028	0.182915	0.453819							0.606329	0.276515	0.675792	0.275113
														0.980774		0.357999	1.24078							0.980774		1.92557			1.16318	0.873046	0.69302	0.387446							1.42234	0.187933	0.68019	1.60888
														0.910836		1.25769	0.473023							0.910836		2.1746			0.197788	0.185008	0.660869	0.302514							0.439917	0.361238	0.646379	0.351535
														1.23863		1.06053	0.73857							1.23863		6.92631			0.47978	1.29774	0.651022	0.38							0.353081	0.200195	0.331389	0.435306
														1.47367		1.32199								1.47367		0.298979			0.458688	0.645544	0.693744	0.422207							0.144227	0.878175	0.52519	0.165689
														1.56569		1.13085								1.56569		0.556579			0.395906	0.389912	0.25074	0.620085							0.125175	0.079581	0.33462	0.095384
														2.26712		0.298659								2.26712		1.0826			1.36586	0.619204	0.206026	0.399442							0.400671	0.106518	0.541561	1.01647
														1.08468		2.03384								1.08468		1.61814			0.606329	0.438417	0.614787	0.251245							0.228233	0.056938	0.391176	1.09217
														2.60883		0.704475								2.60883		0.331879			1.42234	0.346513	0.73778	0.342164							0.665352	0.484276	0.469125	1.06558
														2.65386		0.931605								2.65386		0.146808			0.439917	0.242967	1.15884	0.144663							1.10827	0.09641	0.141166	0.283535
														1.50037		2.92518								1.50037		0.503025			0.353081	0.31165	0.197825	0.533802							0.148198	0.135969	0.421608	0.564732
														1.98405		1.20664								1.98405		0.475814			0.144227	0.319769	2.18151	0.51129							0.660656	0.176359	0.226152	0.30317
														1.02241		1.97032								1.02241		1.05881			0.125175	0.236044	0.276381	0.766034							0.148061	0.125323	0.248517	0.39189
														0.175161		1.16714								0.175161		0.26634			0.400671	0.211799	0.448997	0.303411							0.816683	0.166184	0.539321	0.280968
														1.73855		0.818478								1.73855		0.997782			0.228233	0.261655	0.456182	0.189608							0.502631		0.822236	0.195462
														0.963807		0.959								0.963807		0.602104			0.665352	0.248907	1.3448	0.188462							0.133235		0.641933	0.12884
														1.3085		0.958665								1.3085		0.346568			1.10827	0.24167	0.437424	0.267665							0.56492		0.329734	0.248923
														0.925698		0.983167								0.925698		2.72277			0.148198	0.185552	0.425115	0.19664							0.321605		0.621686	0.080784
														0.653445		0.955196								0.653445		0.096384			0.660656	0.4387	0.298421	0.307919							0.139874		0.545236	0.873438
														0.851683		0.415404								0.851683		6.38668			0.148061	0.608382	0.202619	0.414282							0.21159		0.597596	0.124945
														2.70375		0.413397								2.70375		0.990971			0.816683	0.219205	2.65058	0.210188							0.104625		0.485588	0.516558
														0.524889		0.245601								0.524889		0.519921			0.502631	0.882223	0.2053	3.09166							0.442244		0.549135	0.660959
														5.52544		0.139317								5.52544		0.576083			0.133235	0.565703	0.182031	0.756299							0.509446		0.461573	0.361402
														0.784033		0.924442								0.784033		0.652909			0.56492	0.130532	0.28198	1.21672							0.35581		0.514749	0.289731
														3.85436		3.14475								3.85436		1.03025			0.321605	0.732187	0.234044	0.169765							0.27776		0.460633	0.267082
														2.41802		0.753451								2.41802		0.997094			0.139874	0.317158	0.473205	0.474288							0.756826		0.120907	0.309784
														1.15004		1.13539								1.15004		0.924975			0.21159	0.371586	0.572135	0.343818							0.553595		0.495094	0.22988
														0.954143		0.476518								0.954143		0.571238			0.104625	0.165302	0.294206	0.359078							1.87138		0.563758	0.807292
														0.600386		1.07892								0.600386		1.22256			0.442244	0.142019	0.20215	0.668777							1.10427		0.643011	0.104379
														3.6628		0.778393								3.6628		0.626207			0.509446	0.241469	0.701276	0.971445							0.492017		0.789303	0.098565
														0.39298		0.951512								0.39298		0.522183			0.35581	0.255622	0.709883	0.347283							0.305314		0.085868	0.359772
														1.29659		0.784382								1.29659		0.908687			0.27776	0.440366	0.952706	0.288721							0.651451		0.231971	0.159068
														4.89317		0.293323								4.89317		0.641705			0.756826	1.02558	0.30967	0.315222							0.654327		1.35935	0.26958
														7.64259		1.58872								7.64259		0.431784			0.553595	0.13242	0.322191	0.472285							0.627051		0.470655	0.769653
														2.78367		0.179679								2.78367		0.394149			1.87138	0.146595	0.470056	0.380588							0.334248		0.305856	0.718074
														1.05152		0.228759								1.05152		0.572159			1.10427	0.175233	0.373829	0.463801							0.086293		0.231502	0.321597
														9.03038		0.427825								9.03038		0.631565			0.492017	0.13985	0.31416	0.197097							0.207498		0.492374	0.36786
														4.22113		0.218417								4.22113		0.865192			0.305314	0.086549	0.732067	0.407753							0.67171		0.718835	0.162352
														2.36591		1.01335								2.36591		1.58016			0.651451	0.363442	0.3196	0.477105							0.703699		0.556882	0.35927
														10.0875		0.445581								10.0875		0.262368			0.654327	0.202825	0.178347	0.463298							0.492438		0.580218	0.534656
														0.222477		0.58203								0.222477		0.510722			0.627051	0.202928	0.368284	0.278805							1.90095		0.456672	0.351292
														0.266226		0.546807								0.266226		0.711942			0.334248	0.221209	0.518699	0.153041							0.908191		0.716727	0.389327
														1.22668		1.20182								1.22668		0.239976			0.086293	0.078079	0.86673	0.26459							1.05422		0.655714	0.152343
														1.71073		0.721309								1.71073		0.954473			0.207498	0.183503	0.133972	0.356743							0.529904		0.193378	0.112089
														0.964004		0.888903								0.964004		0.255171			0.67171	0.203778	0.323335	0.711742							0.375155		0.292486	0.128053
														0.700381		1.33587								0.700381		0.667005			0.703699	0.276515	0.306881	0.300886							3.03948		0.680593	0.52829
														0.475035		0.430882								0.475035		0.123272			0.492438	0.187933	0.413084	0.1588							2.44342		0.719681	0.526034
														0.363052		0.669621								0.363052		0.526807			1.90095	0.361238	0.237509	0.297624							0.812228		0.41934	0.420481
														1.50695		0.673519								1.50695		1.25727			0.908191	0.200195	0.267039	0.290412							0.815385		0.579348	0.516785
														0.298994		0.364417								0.298994		0.6991			1.05422	0.878175	0.776855	1.03256							2.72143		0.522011	0.260867
														1.86752		0.351066								1.86752		0.735567			0.529904	0.079581	1.46724	0.166731							0.874901		0.194384	0.475254
														0.758607		0.597061								0.758607		1.26789			0.375155	0.106518	0.462	0.535373							0.520986		0.385247	0.732469
														5.28872		0.856448								5.28872		0.336776			3.03948	0.056938	0.486491	0.308473							0.839162		0.449591	0.546984
														6.85057		0.717192								6.85057		0.302278			2.44342	0.484276	0.41565	0.174241							0.514507		0.33485	0.262128
														2.11846		0.56709								2.11846		0.458864			0.812228	0.09641	0.433445	0.542079							0.420603		0.520774	0.412333
														0.655082		0.985573								0.655082		0.268028			0.815385	0.135969	0.262087	0.338841							0.921019		0.411111	0.197109
														0.230707		0.999051								0.230707		0.416025			2.72143	0.176359	0.294722	0.272877							0.896335		0.529199	0.296479
														0.961842		0.679937								0.961842		0.580506			0.874901	0.125323	0.13284	0.297931							1.11281		0.491426	0.338284
														0.924266		0.635023								0.924266		0.470548			0.520986	0.166184	0.244643	0.303097							1.21788		0.424329	0.234304
														2.39822		0.457181								2.39822		0.564162			0.839162		0.408971	0.328165							0.64301		0.442337	0.266357
														1.16262		1.71265								1.16262		0.448522			0.514507		0.169599	0.238278							0.200955		0.510076	1.24187
														2.12577		0.094765								2.12577		2.24734			0.420603		0.285972	0.106121							0.27989		0.34185	1.6976
														1.06011		0.214124								1.06011		0.788335			0.901537		0.345334	0.089839							0.281446		0.592878	1.10275
														0.855809		0.894639								0.855809		0.5081			0.896335		0.280905	0.122201							1.55703		0.456652	0.793731
														1.13648		0.662167								1.13648		0.978832			1.11281		0.191435	0.186084							1.0947		0.635488	1.7064
														7.33582		0.300502								7.33582		1.05631			1.21788		0.758295	0.250697							0.301127		0.260905	0.415695
														1.6974		0.645464								1.6974		0.2721			0.64301		0.783255	0.170702							1.22054		0.249523	0.334886
														6.74188		0.871314								6.74188		0.44736			1.0431		0.380451	0.201329							0.745402		0.301484	0.407373
														2.39852		0.961062								2.39852		0.654651			0.200955		0.215083	0.202781							0.704444		0.632103	0.283197
														4.31543		0.550635								4.31543		0.855537			0.27989		0.559401	0.231935							2.80493		0.604697	0.956106
														3.82803		0.21696								3.82803		0.430178			0.281446		0.16953	0.506977							2.18772		0.579726	0.337711
														1.90964		0.366662								1.90964		0.220062			1.55703		0.5208	0.499004							1.15416		0.133963	0.441823
														2.14111		0.305698								2.14111		0.324177			1.0947		0.352096	0.470646							0.393833		0.317627	0.456797
														2.9068		0.178554								2.9068		0.242573			0.301127		0.254066	0.594434							0.595389		0.472796	0.321449
														3.63366		0.885283								3.63366		0.534859			1.22054		0.211686	0.647514							0.26873		0.26928	0.236386
														1.15255		0.913915								1.15255		1.10807			0.745402		0.45556	0.379901							1.92664		0.545916	0.330292
														6.70085		1.92557								6.70085		0.60773			0.704444		0.202302	0.46517							0.685994		0.482353	0.468941
														2.32509		2.1746								2.32509		0.520815			2.80493		0.264913	0.842934							0.737058		0.538573	0.584111
														1.88617		6.92631								1.88617		0.574676			2.18772		0.496878	0.65396							1.70481		0.253841	0.604056
														2.64677		0.298979								2.64677		0.544707			1.15416		0.152791	0.287591							1.70992		0.857412	0.510045
														1.84302		0.556579								1.84302		0.203462			0.393833		1.28681	2.56352							0.182713		0.701075	0.319077
														0.976978		1.0826								0.976978		1.45046			0.595389		0.402007	0.892002							0.822544		0.552946	0.105061
														2.53999		1.61814								2.53999		0.601693			0.26873		0.19797	0.466928							1.09051		0.583602	0.217917
														0.527448		0.331879								0.527448		0.32044			1.92664		0.178037	0.287179							0.667968		0.224713	0.601821
														0.403431		0.146808								0.403431		2.24504			0.685994		0.265962	0.166732							1.29602		0.138956	0.146608
														0.291388		0.503025								0.291388		1.01594			0.737058		0.702633	0.120409							4.10292		0.479578	0.807771
														5.49565		0.475814								5.49565		0.40297			1.70481		0.093211	0.973246							2.19727		0.325611	0.342794
														3.77806		1.05881								3.77806		0.49735			1.70992		0.497439	0.129304							0.963774		0.501993	0.294779
														0.861504		0.26634								0.861504		0.777493			0.182713		2.44195	0.127155							4.93711		0.295554	0.50613
														0.487315		0.997782								0.487315		0.731529			0.822544		0.553682	0.329586							1.95401		0.435084	0.285969
														1.31887		0.602104								1.31887		0.478394			1.09051		0.21184	0.439998							1.18425		0.553695	0.334505
														1.03146		0.346568								1.03146		0.187643			0.667968		0.249388	0.164363							1.62311		0.622339	0.340718
														3.13912		2.72277								3.13912		0.391856			1.29602		0.733479	0.490372							1.19839		0.441351	0.433648
														3.60834		0.096384								3.60834		0.846859			4.10292		1.2427	0.744633							0.382349		0.250755	0.436773
														0.218728		6.38668								0.218728		0.627807			2.19727		0.250177	0.192186							0.077941		0.265245	0.450852
														0.402145		0.990971								0.402145		0.276205			0.963774		0.25897	0.12321							0.388734		0.250922	0.619317
														0.511901		0.519921								0.511901		0.350031			4.93711		0.371532	0.220121							1.00621		0.266229	0.354317
														0.670013		0.576083								0.670013		0.249054			1.95401		0.454064	0.267077							2.42376		0.249236	0.31804
														0.965397		0.652909								0.965397		0.57754			1.18425		0.785502	1.15222							0.929859		0.290585	0.367039
														1.88914		1.03025								1.88914		1.5285			1.62311		0.313819	0.232128							4.34075		0.170665	0.333585
														1.36545		0.997094								1.36545		1.4425			1.19839		0.079491	0.24464							0.915681		0.14327	0.258831
														2.62458		0.924975								2.62458		0.836296			0.382349		0.196458	0.772675							0.058909		0.175777	0.68132
														3.42464		0.571238								3.42464		1.3805			0.077941		0.44365	0.366298							0.13161		0.72493	0.248737
														1.65407		1.22256								1.65407		1.27456			0.388734		0.677485	0.320613							0.475362		0.346032	1.16342
														0.948478		0.626207								0.948478		0.744301			1.00621		1.00652	0.239043							0.487174		0.314623	0.706918
														2.13735		0.522183								2.13735		1.49597			2.42376		0.515722	0.337543							1.64972		0.15842	0.369657
														0.751183		0.908687								0.751183		1.30471			0.929859		0.541153	0.100911							0.32569		0.150609	0.453216
														1.26601		0.641705								1.26601		0.468856			4.34075		0.580838	0.364086							0.380883		0.49939	0.386655
														1.13392		0.431784								1.13392		0.116635			0.915681		0.130612	0.31992							1.75552		0.482315	1.13856
														0.402195		0.394149								0.402195		0.203922			0.058909		0.235536	0.399067							1.10404		0.376537	0.91267
														1.02918		0.572159								1.02918		1.21253			0.13161		0.821374	0.103738							0.190021		0.382833	0.54678
														5.54122		0.631565								5.54122					0.475362		0.270308	0.455169							0.1668		0.629785	0.548113
														5.52469		0.865192								5.52469					0.487174		0.499724	0.264462							0.222234		0.304625	0.375302
														1.49832		1.58016								1.49832					1.64972		0.231195	0.139483							0.255416		0.396766	0.507861
														1.02375		0.262368								1.02375					0.32569		0.425809	0.380507							0.650176		0.447734	0.545536
														0.670979		0.510722								0.670979					0.380883		0.636887	0.11158							0.287507		0.233409	0.351133
														0.599704		0.711942								0.599704					1.75552		0.789056	0.254739							1.19455		0.491414	0.50599
														0.595648		0.239976								0.595648					1.10404		0.56081	0.21406							0.863903		0.181509	0.749691
														0.950111		0.954473								0.950111					0.190021		0.932868	0.263264							0.872912		0.293882	0.596569
														0.802831		0.255171								0.802831					0.1668		0.32533	0.518382							0.694723		0.264776	0.5858
														1.83068		0.667005								1.83068					0.222234		0.996903	0.557937							0.534737		0.267367	0.470908
														1.19918		0.123272								1.19918					0.255416		0.130751	0.333339							0.142293		0.525238	0.315432
														4.16895		0.526807								4.16895					0.650176		0.694026	0.184712							0.119786		0.297929	0.536934
														1.28243		1.25727								1.28243					0.287507		0.452492	0.46669							0.098799		0.245852	0.260205
														1.52996		0.6991								1.52996					1.19455		0.522921	0.696483							0.44402		0.322474	0.694602
														4.13601		0.735567								4.13601					0.863903		0.382307	1.79206							0.603335		0.225183	0.775378
														2.03924		1.26789								2.03924					0.872912		0.25099	0.352015							0.548854		0.179338	0.554824
														1.21508		0.336776								1.21508					0.694723		0.227948	0.459583							1.59833		0.504428	0.366928
														2.69335		0.302278								2.69335					0.534737		0.418008	0.232103							1.01734		0.438968	0.401981
														2.10651		0.458864								2.10651					0.142293		0.427749	0.161325							0.734465		0.228405	0.450827
														5.28152		0.268028								5.28152					0.119786		0.217533	0.932713							1.83656		0.552658	0.21867
														2.72213		0.416025								2.72213					0.098799		0.430567	0.138182							3.0178		0.244115	0.774741
														2.05028		0.580506								2.05028					0.44402		0.692862	0.146574							2.16066		0.146514	0.547433
														2.61135		0.470548								2.61135					0.603335		0.180183	0.495142							0.408847		0.30998	0.175415
														3.65935		0.564162								3.65935					0.548854		0.390422	0.220367							0.531602		0.205099	0.268825
														1.21018		0.448522								1.21018					1.59833		0.089108	0.716201							0.708318		0.296528	0.213266
														0.978921		2.24734								0.978921					1.01734		0.316356	0.150213							0.86998		0.37763	0.243037
														0.225508		0.788335								0.225508					0.734465		0.18825	0.198765							0.598436		0.363789	0.645436
														0.015143		0.5081								0.015143					1.83656		1.53153	0.471885							2.56612		0.305938	0.23903
														0.98403		0.978832								0.98403					3.0178		0.558723	0.196119							0.108707		0.306366	1.23656
														0.698048		1.05631								0.698048					2.16066		0.270471	0.173235							1.09366		0.169706	0.280808
														1.04779		0.2721								1.04779					0.408847		0.643633	0.389641							0.412701		0.21243	0.84157
														0.976		0.44736								0.976					0.531602		0.532403	0.15044							1.62505		0.259642	0.494
														1.56912		0.654651								1.56912					0.708318		0.334551	0.53211							0.506017		0.415555	0.253121
														0.738564		0.855537								0.738564					0.86998		1.00511	0.693773							0.180122		0.233341	0.306186
														1.13083		0.430178								1.13083					0.598436		0.449737	0.69769							1.73531		0.087242	0.302074
														0.538576		0.220062								0.538576					2.56612		0.476204	0.3748							3.03843		0.089884	0.466157
														1.27447		0.324177								1.27447					0.108707		0.408357	0.165944							1.0744		0.358988	0.489679
														0.922915		0.242573								0.922915					1.09366		0.677451	0.250958							0.570376		0.078029	0.146716
														0.65813		0.534859								0.65813					0.412701		0.188857	0.28638							1.02744		0.509642	0.132501
														0.746552		1.10807								0.746552					1.62505		0.756381	0.13137							1.95391		0.515746	0.553917
														0.69615		0.60773								0.69615					0.506017		0.368634	1.20953							1.64748		0.220948	0.21721
														1.5511		0.520815								1.5511					0.180122		0.572757	0.37113							1.7483		0.522013	0.170151
														1.44049		0.574676								1.44049					1.73531		0.231009	0.608607							0.427266		0.195416	0.521905
														0.692901		0.544707								0.692901					3.03843		0.605264	0.33457							1.98434		0.462282	0.310622
														0.612363		0.203462								0.612363					1.0744		0.679426	0.098399							1.39523		0.387426	0.221736
														0.284425		1.45046								0.284425					0.570376		0.81739	0.263787							0.343095		0.31573	0.292511
														2.30908		0.601693								2.30908					1.02744		0.596916	0.246811							4.48964		0.377848	0.273508
														0.442188		0.32044								0.442188					1.95391		0.649328	0.524441							0.49947		0.307652	0.31438
														0.785797		2.24504								0.785797					1.64748		0.333746	0.215324							0.235947		0.58447	0.475187
														1.72747		1.01594								1.72747					1.7483		0.448583	0.054195							0.476431		0.586012	0.551448
														1.37126		0.40297								1.37126					0.427266		0.226311	0.721268							0.225172		0.597567	0.680639
														0.278888		0.49735								0.278888					1.98434		0.39289	0.529238							2.81986		0.405378	0.589178
														0.671315		0.777493								0.671315					1.39523		0.760108	0.799711							1.60119		0.504222	0.233515
														0.460277		0.731529								0.460277					0.343095		0.296199	0.200298							0.63792		0.561809	0.355656
														1.21714		0.478394								1.21714					4.48964		0.24021	0.22738							1.89802		0.190734	0.448975
														0.99277		0.187643								0.99277					0.49947		0.284165	0.310006							0.964341		0.521557	0.453722
														1.39823		0.391856								1.39823					0.235947		0.536775	0.512278							3.34122		0.432692	0.213567
														1.13782		0.846859								1.13782					0.476431		0.188101	0.43006							0.131432		0.286861	0.467889
														1.29579		0.627807								1.29579					0.225172		0.309829	0.747407							0.42683		0.330096	0.442373
														1.14465		0.276205								1.14465					2.81986		0.353654	0.586055							0.524061		0.476092	0.395882
														1.15717		0.350031								1.15717					1.60119		0.277399	0.06792							1.36652		0.497513	0.396694
														1.13911		0.249054								1.13911					0.63792		0.40233	0.124659							1.11896		0.311985	0.310491
														0.850381		0.57754								0.850381					1.89802		0.191889	0.243953							1.13791		0.235386	0.426151
														3.00132		1.5285								3.00132					0.964341		0.049186	0.316627							3.10877		0.467685	0.377038
														1.9247		1.4425								1.9247					3.34122		0.377387	0.292997							0.515523		0.297096	0.234835
														0.893645		0.836296								0.893645					0.131432		0.177472	0.174046							0.411932		0.207497	0.433306
														0.967779		1.3805								0.967779					0.42683		0.618847	1.60508							0.574979		0.38087	0.402936
														0.741445		1.27456								0.741445					0.524061		0.248659	0.081538							1.02491		0.418555	0.467679
														0.552418		0.744301								0.552418					1.36652		0.811537	0.4232							0.720879		0.303285	0.427725
														1.74753		1.49597								1.74753					1.11896		0.265658	0.41396							0.652289		0.125821	0.49069
														2.11054		1.30471								2.11054					1.13791		0.207139	0.306872							0.557643		0.262394	0.558192
														2.05552		0.468856								2.05552					3.10877		0.105849	0.996347							0.088465		0.221279	0.37558
														1.17007		0.116635								1.17007					0.515523		0.126189	0.310584							1.14599		0.248512	0.394763
														1.58427		0.203922								1.58427					0.411932		0.15728	1.08325							0.629921		0.119617	0.439224
														1.55265		1.21253								1.55265					0.574979		0.083954	0.149774							1.16418		0.206967	0.148677
														0.62876										0.62876					1.02491		0.249301	0.190249							1.82961		0.410644	0.349946
														3.57844										3.57844					0.720879		0.236172	0.417977							1.12285		0.569524	0.574567
														0.596912										0.596912					0.652289		0.384036	1.38626							1.26612		0.374202	0.456266
														0.81298										0.81298					0.557643		0.165865	0.201478							1.08675		0.374284	0.673466
														0.917559										0.917559					0.088465		0.406248	0.120797							0.26538		0.390731	0.460006
														0.981518										0.981518					1.14599		0.297062	0.246598							1.85818		0.153046	0.172368
														0.645871										0.645871					0.629921		0.411445	2.02499							2.09669		0.164358	0.288711
														1.17638										1.17638					1.16418		0.89085	0.624116							0.701734		0.241152	0.441223
														1.58608										1.58608					1.82961		1.54367	0.448207							0.7779		0.478399	0.259389
														1.59541										1.59541					1.12285		0.160123	0.351336							0.754875		0.180617	0.305652
														0.535856										0.535856					1.26612		0.163438	0.307196							0.809249		0.209524	0.332692
														0.604591										0.604591					1.08675		0.497469	0.326609							0.527884		0.758638	0.329312
														2.07129										2.07129					0.26538		0.502799	0.497086							0.38125		0.672273	0.648097
														0.895564										0.895564					1.85818		0.782911	0.478475							0.347833		0.544761	0.545794
														0.73082										0.73082					2.09669		0.09447	0.60548							0.247007		0.608279	0.442708
														0.165856										0.165856					0.701734		1.10835	0.435759							0.137166		0.436955	0.22398
														0.688566										0.688566					0.7779		1.04063	0.539326							1.46217		0.55109	0.63352
														0.82899										0.82899					0.754875		0.151663	0.354033							1.70949		0.919657	0.448211
														0.823003										0.823003					0.809249		0.836427	0.139054							0.236866		0.504426	0.480602
														0.449306										0.449306					0.527884		0.130896	0.701395							0.30975		0.176265	0.471626
														1.69547										1.69547					0.38125		0.408286	0.171827							0.212635		0.24121	0.775773
														1.81464										1.81464					0.347833		0.351081	0.195785							0.987748		0.487626	0.392077
														1.25399										1.25399					0.247007		0.354987	0.42428							0.056132		0.246339	0.389574
														1.30952										1.30952					0.137166		2.65388	0.439084							0.288591		0.822126	0.484656
														1.93103										1.93103					1.46217		0.668087	0.769851							0.111471		0.60037	0.161331
														1.46672										1.46672					1.70949		0.485583	0.878407							0.159769		0.187115	0.326754
														0.94879										0.94879					0.236866		0.541	1.11493							0.199455		0.563813	0.412684
														3.2366										3.2366					0.30975		0.36705	0.727602							0.919166		0.392693	0.542411
														0.614761										0.614761					0.212635		0.189819	0.524489							0.225623		0.300924	0.407583
														0.494152										0.494152					0.987748		0.614306	0.433247							0.726356		0.232756	0.394456
														2.18152										2.18152					0.056132		1.5609	0.20033							0.428078		0.416146	0.496316
														0.545625										0.545625					0.288591		0.205525	0.068111							0.74126		0.528265	0.362384
														1.18432										1.18432					0.111471		0.423946	0.19034							0.564914		0.36025	0.275601
														1.06868										1.06868					0.159769		0.299896	1.18788							0.230773		0.260967	0.628471
														3.16823										3.16823					0.199455		0.672455	0.851284							1.37964		0.351492	0.517745
														1.60682										1.60682					0.919166		0.473083	0.632434							3.33565		0.284583	0.360483
														0.898949										0.898949					0.225623		0.232118	0.31838							0.756254		0.308128	0.471239
														1.14316										1.14316					0.726356		0.352848	0.298136							0.939095		0.597376	0.405657
														0.957764										0.957764					0.428078		0.786291	0.324564							2.28548		0.611752	0.67935
														1.02954										1.02954					0.74126		1.55083	0.472145							0.876276		0.789315	0.407309
														0.638016										0.638016					0.564914		0.381328	0.363934							0.318457		0.712531	0.477649
														2.05504										2.05504					0.230773		0.776755	0.313514							0.315421		0.793308	0.454372
														0.690146										0.690146					1.37964		0.332574	0.700836							1.68035		0.450583	0.63306
														0.459933										0.459933					3.33565		0.191193	0.50827							0.132445		0.372547	0.859266
														4.40848										4.40848					0.756254		0.60225	0.520126							1.34607		0.290624	0.962818
														1.76801										1.76801					0.939095		0.559988	0.360499							0.220201		0.446091	0.168552
														3.0008										3.0008					2.28548		0.185395	0.22896							1.90016		0.2318	0.115104
														2.94102										2.94102					0.876276		0.179665	0.248293							0.412878		0.364916	0.125015
														0.890666										0.890666					0.318457		0.666261	0.191454							0.220144		0.415718	0.497669
														0.27786										0.27786					0.315421		0.544627	0.459715							0.515079		0.289017	0.76815
														1.60396										1.60396					1.68035		0.287448	0.407796							2.54508		0.252895	0.105169
														0.718115										0.718115					0.132445		0.28239	0.818009							2.76147		0.392546	0.623667
														1.31489										1.31489					1.34607		0.797425	0.166197							4.17671		0.751266	0.255784
														1.1522										1.1522					0.220201		0.236287	0.287476							0.52569		0.598314	0.534775
														0.609754										0.609754					1.90016		0.525214	0.102788							1.12904		0.6389	0.35716
														0.577698										0.577698					0.412878		0.192716	0.07781							0.192143		0.635542	0.339683
														2.52914										2.52914					0.220144		0.130474	1.36288							1.41209		0.351901	0.513959
														0.195754										0.195754					0.515079		0.397797	0.68225							1.99682		0.568367	0.482571
														0.673712										0.673712					2.54508		0.573013	0.153078							1.12831		0.445831	0.312055
														2.76866										2.76866					2.76147		0.740882	0.711889							0.824184		0.989532	1.38553
														3.65717										3.65717					4.15411		0.480638	0.24085							1.02997		0.480787	1.00965
														1.48196										1.48196					0.52569		1.61232	0.117773							0.525355		0.417929	1.1918
														1.12868										1.12868					1.12904		0.357451	0.286972							0.229513		0.467174	0.472353
														1.71788										1.71788					0.192143		0.151435	0.143819							0.78096		0.350937	0.53024
														0.740507										0.740507					1.41209		0.478665	0.172764							1.09364		0.49687	0.557641
														1.05147										1.05147					1.99682		0.457758	0.293779							0.989474		0.44928	0.750958
														2.23568										2.23568					1.12831		0.540212	0.112062							0.661531		0.457005	0.422081
														0.441326										0.441326					0.824184		0.886207	0.414535							0.859063		0.400747	0.430221
														1.10487										1.10487					1.02997		0.556208	0.09756							1.0511		0.382472	0.395348
														4.39687										4.39687					0.525355		0.388621	0.289631							0.363111		0.527922	0.832547
														1.13695										1.13695					0.229513		0.279748	0.774255							0.474583		0.348664	0.363725
														1.68272										1.68272					0.78096		0.185856	1.13261							1.03758		0.403256	0.291024
														2.4534										2.4534					1.09364		0.422979	0.465591							1.33852		0.402394	0.370784
														3.04589										3.04589					0.989474		0.312681	0.092548							1.68358		0.35548	0.320959
														0.428113										0.428113					0.661531		0.194374	1.94261							0.902974		0.551608	0.14314
														1.36365										1.36365					0.859063		0.310752	0.564994							0.604015		0.545558	0.33703
														0.956222										0.956222					1.0511		0.485048	0.463395							1.0025		0.696972	0.4599
														0.779172										0.779172					0.363111		0.898839	0.82623							1.02454		0.586488	0.555404
														1.53699										1.53699					0.474583		0.159883	0.146914							0.699156		0.508292	0.321903
														0.606816										0.606816					1.03758		0.698925	0.121171							1.32241		0.587337	0.224685
														2.85091										2.85091					1.33852		0.889763	0.137227							0.827951		0.597484	0.276721
														0.891432										0.891432					1.68358		0.232265	0.418266							0.571578		0.456073	0.267331
														0.582908										0.582908					0.902974		0.156129	0.212368							0.527007		0.528535	0.349308
														1.09746										1.09746					0.604015		0.332645	0.340786							1.63244		0.511709	0.150863
														1.34576										1.34576					1.0025		0.464969	0.41721							1.54622		0.25848	0.116981
														0.325688										0.325688					1.02454		0.40113	1.25836							1.33268		0.495936	0.388678
														0.989475										0.989475					0.699156		0.590312	0.485235							1.10474		0.678462	0.420936
														0.431008										0.431008					1.32241		0.726748	0.665654							1.20158		0.679893	0.316133
														1.66833										1.66833					0.827951		0.121995	0.188528							1.07139		0.706813	0.148883
														0.367571										0.367571					0.571578		0.205835	0.150138							0.274621		0.215275	0.131746
														1.63812										1.63812					0.527007		0.232934	0.111278							0.692305		0.609627	0.162557
														0.83228										0.83228					1.63244		0.116462	0.564075							0.434555		0.395629	0.256502
														0.828277										0.828277					1.54622		0.360852	0.62677							0.237268		0.531393	0.209907
														2.3081										2.3081					1.33268		0.705825	1.11397							0.357013		0.611263	0.344352
														1.50752										1.50752					1.10474		1.43583	0.236973							1.07133		0.566501	0.114139
														0.795762										0.795762					1.20158		0.526099	0.801274							1.38728		0.578317	0.220887
														1.6033										1.6033					1.07139		0.300144	1.25623							1.24618		0.558105	0.12567
														0.179045										0.179045					0.274621		0.560246	0.199678							0.553019		0.569115	0.232891
														0.175111										0.175111					0.692305		0.839172	0.315792							1.05466		0.698148	0.229115
														2.20616										2.20616					0.434555		0.371741	0.638143							1.22122		0.376808	0.259897
														0.807889										0.807889					0.237268		0.292338	0.221466							1.1988		0.219499	0.453901
														0.569858										0.569858					0.357013		0.419077	0.13228							1.16641		0.165481	0.457395
														2.76079										2.76079					1.07133		0.254893	0.381601							0.687933		0.765964	0.476937
														1.40384										1.40384					1.38728		0.21208	0.232724							0.567814		0.199103	0.1803
														0.264831										0.264831					1.24618		0.429159	1.10464							0.22024		0.512301	0.297885
														0.546871										0.546871					0.553019		0.293752	0.752507							0.945137		0.485021	0.117693
														3.38495										3.38495					1.05466		0.560288	0.265311							0.787565		0.138907	0.609049
														2.36478										2.36478					1.22122		0.17328	0.132167							0.494721		0.30704	0.495235
														0.515902										0.515902					1.1988		0.567105	0.65435							0.894106		0.365075	0.324711
														2.22079										2.22079					1.16641		0.376765	0.508311							1.41776		0.453942	0.167529
														2.32499										2.32499					0.687933		0.444278	0.80713							0.775527		0.153331	0.200192
														2.34955										2.34955					0.567814		0.226793	0.275113							1.13839		0.317792	0.105457
														1.33488										1.33488					0.22024		0.2471	1.60888							3.36601		0.182524	0.300397
														1.15841										1.15841					0.945137		1.21282	0.351535							0.732895		0.071216	0.393371
														0.310437										0.310437					0.787565		0.286738	0.435306							0.655897		0.16309	0.376963
														0.647673										0.647673					0.494721		0.380052	0.165689							0.97627		0.213443	0.534833
														0.295504										0.295504					0.894106		0.478502	0.095384							2.30241		0.245784	0.273066
														1.35262										1.35262					1.41776		0.302933	1.01647							0.443232		0.193638	0.18209
														0.605718										0.605718					0.775527		0.502399	1.09217							0.736895		0.070787	0.180453
														1.14271										1.14271					1.13839		0.210194	1.06558							0.920461		0.170177	0.522151
														1.69466										1.69466					3.36601		0.36107	0.283535							0.855658		0.432417	0.436309
														0.431751										0.431751					0.732895		0.665356	0.564732							0.36694		0.282347	0.211973
														1.65133										1.65133					0.655897		0.437512	0.30317							1.43974		0.523845	0.531001
														2.63201										2.63201					0.97627		0.094597	0.39189							0.506252		0.259625	0.196826
														1.16703										1.16703					2.30241		0.169215	0.280968							0.389457		0.203989	0.36974
														0.593614										0.593614					0.443232		0.776934	0.195462							1.10841		0.197262	0.163913
														0.589484										0.589484					0.736895		0.193565	0.12884							1.01852		0.145667	0.117584
														1.46603										1.46603					0.920461		0.565602	0.248923							0.485281		0.670627	0.094679
														0.295523										0.295523					0.855658		0.307866	0.080784							0.4529		0.410497	0.195876
														0.369713										0.369713					0.36694		0.369739	0.873438							1.44813		0.649669	0.56056
														0.351246										0.351246					1.43974		0.454818	0.124945							1.37302		0.624216	0.250726
														1.41359										1.41359					0.506252		0.271431	0.516558							0.487681		0.590509	0.186278
														1.28699										1.28699					0.389457		0.190232	0.660959							0.87557		0.122382	0.504787
														0.950955										0.950955					1.10841		0.119091	0.361402							0.502461		0.543213	0.29626
														0.411317										0.411317					1.01852		0.437147	0.289731							0.351132		0.46504	0.437976
														0.430628										0.430628					0.485281		0.432138	0.267082							0.493725		0.268508	0.392356
														0.498676										0.498676					0.4529		0.267858	0.309784							0.713823		0.190761	0.654253
														0.785928										0.785928					1.44813		0.379573	0.22988							2.04896		0.554169	0.40744
														0.974864										0.974864					1.37302		0.492575	0.807292							0.18673		0.272782	0.395592
														0.558185										0.558185					0.487681		0.18475	0.104379							0.366864		0.150839	0.396763
														0.726102										0.726102					0.87557		0.503506	0.098565							0.213311		0.669725	0.374731
														1.20858										1.20858					0.502461		0.319615	0.359772							0.477672		0.180009	0.352133
														2.06163										2.06163					0.351132		0.260223	0.159068							0.84265		0.355602	0.199618
														1.2735										1.2735					0.493725		0.237928	0.26958							0.641852		0.674224	0.332242
														1.1258										1.1258					0.713823		0.350832	0.769653							1.18564		0.259476	0.223011
														0.743618										0.743618					2.04896		0.325327	0.718074							0.251589		0.100751	0.537514
														1.00641										1.00641					0.18673		0.224728	0.321597							1.0367		0.304752	0.314305
														0.778675										0.778675					0.366864		0.739919	0.36786							0.925838		0.400717	0.365401
														1.33669										1.33669					0.213311		0.481537	0.162352							0.822001		0.400065	0.437928
														1.52166										1.52166					0.477672		0.121711	0.35927							0.071948		0.722557	0.31188
														0.643641										0.643641					0.84265		0.189659	0.534656							0.35031		0.566415	0.558469
														0.43448										0.43448					0.641852		0.672397	0.351292							0.613391		0.791601	0.287628
														0.422107										0.422107					1.18564		1.44925	0.389327							0.391793		0.903043	0.203825
																													0.251589		0.714622	0.152343							0.876851		0.586088	0.530806
																													1.0367		0.73143	0.112089							0.687526		0.29014	0.341939
																													0.925838		0.675792	0.128053							0.176555		0.389371	0.370537
																													0.822001		0.68019	0.52829							0.622153		0.300523	0.495653
																													0.071948		0.646379	0.526034							0.3104		0.461687	0.25457
																													0.35031		0.331389	0.420481							0.727761		0.22057	0.291387
																													0.613391		0.52519	0.516785							1.22777		0.846989	0.262845
																													0.391793		0.33462	0.260867							0.452011		0.302891	0.196962
																													0.876851		0.541561	0.475254							0.431076		0.329295	0.190455
																													0.687526		0.391176	0.732469							0.751962		0.36311	0.158397
																													0.176555		0.469125	0.546984							0.656255		0.388352	0.285676
																													0.622153		0.141166	0.262128							0.73193		0.380583	0.446351
																													0.3104		0.421608	0.412333							0.539223		0.357514	0.273765
																													0.727761		0.226152	0.197109							0.240607		0.14069	0.488942
																													1.22777		0.248517	0.296479							0.421823		0.140653	0.130649
																													0.452011		0.539321	0.338284							0.932333		0.154605	0.311306
																													0.431076		0.822236	0.234304							1.21554		0.128441	0.24336
																													0.751962		0.641933	0.266357							0.930442		0.124238	0.482538
																													0.656255		0.329734	1.24187							0.37043		0.330168	0.451566
																													0.73193		0.621686	1.6976							1.87251		0.281083	0.215768
																													0.539223		0.545236	1.10275							0.701428		0.254806	0.168659
																													0.240607		0.597596	0.793731							1.20974		0.296016	0.25692
																													0.421823		0.485588	1.7064							0.961753		0.123967	0.351234
																													0.932333		0.549135	0.415695							0.597653		0.113316	0.352675
																													1.21554		0.461573	0.334886							0.356531		0.34715	0.41491
																													0.930442		0.514749	0.407373							0.608781		0.33829	0.3175
																													0.37043		0.460633	0.283197							0.340684		0.340389	0.337752
																													1.87251		0.120907	0.956106							1.43592		0.362394	0.437621
																													0.701428		0.495094	0.337711							0.27629		0.651439	0.878885
																													1.20974		0.563758	0.441823							0.231873		0.600985	0.553104
																													0.961753		0.643011	0.456797							0.942823		0.380659	0.214446
																													0.597653		0.789303	0.321449							2.25461		0.520917	0.259792
																													0.356531		0.085868	0.236386							0.729492		0.734038	0.243132
																													0.608781		0.231971	0.330292							0.556306		0.102523	0.336212
																													0.340684		1.35935	0.468941							0.419613		0.423286	0.327804
																													1.43592		0.470655	0.584111							1.54639		0.67752	0.639343
																													0.27629		0.305856	0.604056							0.969929		0.443759	0.334175
																													0.231873		0.231502	0.510045							0.586482		0.435805	0.462604
																													0.942823		0.492374	0.319077							0.266171		0.444857	0.444644
																													2.25461		0.718835	0.105061							0.94766		0.115239	0.405421
																													0.729492		0.556882	0.217917							0.459016		0.114222	0.241927
																													0.556306		0.580218	0.601821							0.519942		0.422311	0.296327
																													0.419613		0.456672	0.146608							0.502446		0.288199	0.457682
																													1.54639		0.716727	0.807771							0.87651		0.210753	0.512499
																													0.969929		0.655714	0.342794							0.162176		0.387186	0.169384
																													0.586482		0.193378	0.294779							0.653816		0.390452	0.330922
																													0.266171		0.292486	0.50613							0.969057		0.268087	0.299113
																													0.94766		0.680593	0.285969							0.883625		0.565811	1.38083
																													0.459016		0.719681	0.334505							1.02069		0.451567	0.658402
																													0.519942		0.41934	0.340718							0.519616		0.568965	0.596412
																													0.502446		0.579348	0.433648							0.127462		0.129671	0.373701
																													0.87651		0.522011	0.436773							0.576805		0.172729	0.639739
																													0.162176		0.194384	0.450852							0.419631		0.228948	0.619309
																													0.653816		0.385247	0.619317							0.911988		0.583139	0.449575
																													0.969057		0.449591	0.354317							0.420676		0.582521	0.590577
																													0.883625		0.33485	0.31804							0.536831		0.349096	0.400027
																													1.02069		0.520774	0.367039							1.3296		0.514648	0.456407
																													0.519616		0.411111	0.333585							0.116234		0.291385	0.333391
																													0.127462		0.529199	0.258831							0.912658		0.559963	0.345676
																													0.576805		0.491426	0.68132							0.703972		0.936851	0.28
																													0.419631		0.424329	0.248737							0.601159		0.545206	0.416745
																													0.911988		0.442337	1.16342							0.611387		0.624456	0.133864
																													0.420676		0.510076	0.706918							2.50468		0.332208	0.41689
																													0.536831		0.34185	0.369657							2.2761		0.485538	0.423347
																													1.3296		0.592878	0.453216							1.14565		0.333054	0.561064
																													0.116234		0.456652	0.386655							2.11203		0.348361	0.344926
																													0.912658		0.635488	1.13856							2.12115		0.411221	0.224506
																													0.703972		0.260905	0.91267							0.433805		0.352392	0.295618
																													0.601159		0.249523	0.54678							0.751434		0.061504	0.326328
																													0.611387		0.301484	0.548113							0.470466		0.434493	0.658011
																													2.50468		0.632103	0.375302							2.10878		0.191825	0.778391
																													2.2761		0.604697	0.507861							0.883876		0.170361	0.631345
																													1.14565		0.579726	0.545536							0.811782		0.124151	0.688495
																													2.11203		0.133963	0.351133							1.20036		0.113339	0.450222
																													2.12115		0.317627	0.50599							1.22527		0.119157	0.577272
																													0.433805		0.472796	0.749691							0.268167		0.172268	0.360773
																													0.751434		0.26928	0.596569							0.184441		0.536348	0.384186
																													0.470466		0.545916	0.5858							0.274206		0.12051	0.68006
																													2.10878		0.482353	0.470908							0.271793		0.218161	0.602108
																													0.883876		0.538573	0.315432							0.163682		0.185632	0.493348
																													0.811782		0.253841	0.536934							2.73629		0.187337	0.339152
																													1.20036		0.857412	0.260205							1.06132		0.381482	0.399838
																													1.22527		0.701075	0.694602							0.468855		0.278527	0.785548
																													0.268167		0.552946	0.775378							0.768207		0.111553	0.849144
																													0.184441		0.583602	0.554824							0.25566		0.162641	0.754674
																													0.274206		0.224713	0.366928							0.466948		0.145918	0.697068
																													0.271793		0.138956	0.401981							0.849905		0.28137	0.550052
																													0.163682		0.479578	0.450827							1.27152		0.217082	0.990392
																													2.73629		0.325611	0.21867							0.459418		0.216847	0.638557
																													1.06132		0.501993	0.774741							0.650716		0.50659	0.392145
																													0.468855		0.295554	0.547433							0.19745		0.202441	0.369026
																													0.768207		0.435084	0.175415							0.361968		0.207815	0.383717
																													0.25566		0.553695	0.268825							0.325399		0.87775	0.426253
																													0.466948		0.622339	0.213266							0.281553		0.270822	0.463347
																													0.849905		0.441351	0.243037							0.473118		0.320068	0.361624
																													1.27152		0.250755	0.645436							0.262805		0.967938	0.269498
																													0.459418		0.265245	0.23903							0.157829		0.242053	0.817114
																													0.650716		0.250922	1.23656							0.244064		0.168649	0.235993
																													0.19745		0.266229	0.280808							0.347053		0.595631	0.38128
																													0.361968		0.249236	0.84157							0.610626		0.334891	0.507692
																													0.325399		0.290585	0.494							1.26565		0.327245	0.25959
																													0.281553		0.170665	0.253121							0.511371		0.063224	0.335624
																													0.473118		0.14327	0.306186							0.167213		0.133486	0.324345
																													0.262805		0.175777	0.302074							0.516852		0.207123	0.233556
																													0.157829		0.72493	0.466157							0.761143		0.27231	0.295667
																													0.244064		0.346032	0.489679							0.637373		0.375904	0.226728
																													0.347053		0.314623	0.146716							0.154108		0.225065	0.295381
																													0.610626		0.15842	0.132501							0.387288		0.314821	0.363185
																													1.26565		0.150609	0.553917							0.514269		0.41703	0.269639
																													0.511371		0.49939	0.21721							0.987316		0.156927	0.197154
																													0.167213		0.482315	0.170151							0.182828		1.09827	0.422086
																													0.516852		0.376537	0.521905							0.291633		0.40237	0.269467
																													0.761143		0.382833	0.310622							0.89497		0.358402	0.258202
																													0.637373		0.629785	0.221736							0.212712		0.488026	0.207805
																													0.154108		0.304625	0.292511							0.069019			0.303823
																													0.387288		0.396766	0.273508							0.17876			0.209375
																													0.514269		0.447734	0.31438							0.620808			0.163336
																													0.987316		0.233409	0.475187							0.254526			0.095963
																													0.182828		0.491414	0.551448							0.209259			0.238298
																													0.291633		0.181509	0.680639							1.14611			0.145699
																													0.89497		0.293882	0.589178							1.24195			0.373388
																													0.212712		0.264776	0.233515							0.478977			1.11881
																													0.069019		0.267367	0.355656							0.894012			0.320412
																													0.17876		0.525238	0.448975							0.212033			0.302163
																													0.620808		0.297929	0.453722							1.24385			0.341087
																													0.254526		0.245852	0.213567							1.19942			0.34698
																													0.209259		0.322474	0.467889							1.12247			0.271763
																													1.14611		0.225183	0.442373							1.0086			0.424113
																													1.24195		0.179338	0.395882							0.399733			0.414438
																													0.478977		0.504428	0.396694							0.78583			0.449894
																													0.894012		0.438968	0.310491							0.593624			0.356091
																													0.212033		0.228405	0.426151							0.213934			0.348149
																													1.24385		0.552658	0.377038							0.663367			0.286526
																													1.19942		0.244115	0.234835							0.741436			0.345314
																													1.12247		0.146514	0.433306							0.122485			0.306257
																													1.0086		0.30998	0.402936							0.901808			0.441159
																													0.399733		0.205099	0.467679							0.716584			0.498853
																													0.78583		0.296528	0.427725							0.290742			0.54847
																													0.593624		0.37763	0.49069							1.30175			0.266672
																													0.213934		0.363789	0.558192							0.107172			0.283017
																													0.663367		0.305938	0.37558							0.883064			0.436397
																													0.741436		0.306366	0.394763							0.280623			0.356148
																													0.122485		0.169706	0.439224							0.971946			0.374931
																													0.901808		0.21243	0.148677							1.03892			0.491365
																													0.716584		0.259642	0.349946							0.467007			0.622325
																													0.290742		0.415555	0.574567							0.798448			0.51444
																													1.30175		0.233341	0.456266							0.390425			0.413364
																													0.107172		0.087242	0.673466							0.467292			0.421152
																													0.883064		0.089884	0.460006							0.465561			0.33128
																													0.280623		0.358988	0.172368							0.9319			0.374381
																													0.971946		0.078029	0.288711							0.907085			0.547103
																													1.03892		0.509642	0.441223							1.22828			0.469823
																													0.467007		0.515746	0.259389							0.504987			0.253983
																													0.798448		0.220948	0.305652							0.160294			0.347906
																													0.390425		0.522013	0.332692							0.224643			0.323084
																													0.467292		0.195416	0.329312							0.775081			0.282712
																													0.465561		0.462282	0.648097							0.941064			0.323454
																													0.926031		0.387426	0.545794							0.63667			0.129089
																													0.907085		0.31573	0.442708							0.508078			0.359349
																													1.22828		0.377848	0.22398							0.213302			0.1669
																													0.504987		0.307652	0.63352							1.63441			0.217328
																													0.160294		0.58447	0.448211							1.77861			0.594191
																													0.224643		0.586012	0.480602							1.70777			0.059098
																													0.775081		0.597567	0.471626							0.84855			0.270955
																													0.941064		0.405378	0.775773							0.714183			0.345055
																													0.63667		0.504222	0.392077							0.324027			0.124883
																													0.508078		0.561809	0.389574							0.47009			0.134111
																													0.213302		0.190734	0.484656							2.16788			0.098248
																													1.63441		0.521557	0.161331							1.4019			0.107056
																													1.77861		0.432692	0.326754							0.379636			0.381618
																													1.70777		0.286861	0.412684							0.31185			0.155638
																													0.84855		0.330096	0.542411							0.431643			0.293009
																													0.714183		0.476092	0.407583							0.288651			0.19969
																													0.324027		0.497513	0.394456							1.38237			0.405474
																													0.47009		0.311985	0.496316							1.60179			0.511967
																													2.16788		0.235386	0.362384							0.202637			0.12212
																													1.4019		0.467685	0.275601							1.25782			0.166694
																													0.379636		0.297096	0.628471							1.10003			0.171982
																													0.31185		0.207497	0.517745							0.596398			0.104936
																													0.431643		0.38087	0.360483							0.570093			0.553166
																													0.288651		0.418555	0.471239							0.505794			0.220365
																													1.38237		0.303285	0.405657							0.175395			0.229984
																													1.60179		0.125821	0.67935							1.11094			0.323789
																													0.202637		0.262394	0.407309							2.05791			0.269381
																													1.25782		0.221279	0.477649							0.414631			0.126375
																													1.10003		0.248512	0.454372							0.334975			0.604552
																													0.596398		0.119617	0.63306							0.797423			0.205404
																													0.570093		0.206967	0.859266							0.769882			0.167341
																													0.505794		0.410644	0.962818							0.452772			0.112883
																													0.175395		0.569524	0.168552							0.304825			0.484099
																													1.11094		0.374202	0.115104							0.461786			0.156354
																													2.05791		0.374284	0.125015							0.952431			0.251427
																													0.414631		0.390731	0.497669							0.761141			0.965291
																													0.334975		0.153046	0.76815							0.528895			0.781391
																													0.797423		0.164358	0.105169							0.652779			0.096141
																													0.769882		0.241152	0.623667							0.684147			0.471091
																													0.452772		0.478399	0.255784							0.332125			0.433592
																													0.304825		0.180617	0.534775							0.537606			0.452858
																													0.461786		0.209524	0.35716							0.646392			0.503854
																													0.952431		0.758638	0.339683							0.620187			0.220448
																													0.761141		0.672273	0.513959							0.787261			0.368125
																													0.528895		0.544761	0.482571							0.661191			0.203995
																													0.652779		0.608279	0.312055							0.455095			0.207415
																													0.684147		0.436955	1.38553							1.59936			0.180569
																													0.332125		0.55109	1.00965							1.49335			0.121643
																													0.537606		0.919657	1.1918							1.26521			0.110088
																													0.646392		0.504426	0.472353							0.185321			0.210121
																													0.620187		0.176265	0.53024							1.51615			0.241631
																													0.787261		0.24121	0.557641							0.808765			0.930216
																													0.661191		0.487626	0.750958							1.21713			0.177496
																													0.455095		0.246339	0.422081							1.77587			0.30776
																													1.59936		0.822126	0.430221							0.418376			0.248155
																													1.49335		0.60037	0.395348							1.53649			0.490504
																													1.26521		0.187115	0.832547							0.808524			0.127485
																													0.185321		0.563813	0.363725							1.17105			0.408913
																													1.51615		0.392693	0.291024							0.353469			0.25734
																													0.808765		0.300924	0.370784							0.380248			0.2313
																													1.21713		0.232756	0.320959							0.389806			0.511213
																													1.77587		0.416146	0.14314							0.308649			0.328061
																													0.418376		0.528265	0.33703							0.472852			0.65426
																													1.53649		0.36025	0.4599							0.591707			0.317448
																													0.808524		0.260967	0.555404							1.27767			0.795178
																													1.17105		0.351492	0.321903							0.569308			0.562808
																													0.353469		0.284583	0.224685							0.662806			0.592558
																													0.380248		0.308128	0.276721							0.854804			0.157075
																													0.389806		0.597376	0.267331							1.27718			0.432883
																													0.308649		0.611752	0.349308							1.27428			0.127157
																													0.472852		0.789315	0.150863							1.23952			0.206492
																													0.591707		0.712531	0.116981							0.965098			0.137301
																													1.27767		0.793308	0.388678							0.317277			0.128369
																													0.569308		0.450583	0.420936							0.599618			0.148917
																													0.662806		0.372547	0.316133							0.554716			0.269809
																													0.854804		0.290624	0.148883							0.489839			0.318647
																													1.27718		0.446091	0.131746							0.459208			0.537146
																													1.27428		0.2318	0.162557							1.51406			0.228563
																													1.23952		0.364916	0.256502							1.47172			0.243505
																													0.965098		0.415718	0.209907							1.52301			0.191143
																													0.317277		0.289017	0.344352							0.325052			0.161906
																													0.599618		0.252895	0.114139							1.19739			0.079828
																													0.554716		0.392546	0.220887							1.44206			0.620162
																													0.489839		0.751266	0.12567							0.919153			0.303762
																													0.459208		0.598314	0.232891							1.85878			0.254675
																													1.51406		0.6389	0.229115							0.720085			0.246685
																													1.47172		0.635542	0.259897							3.01588			0.276261
																													1.52301		0.351901	0.453901							1.83237			0.461021
																													0.325052		0.568367	0.457395							0.529539			0.400184
																													1.19739		0.445831	0.476937							0.397115			0.268557
																													1.44206		0.989532	0.1803							2.53751			0.242638
																													0.919153		0.480787	0.297885							0.903732			0.223939
																													1.85878		0.417929	0.117693							2.51608			0.06947
																													0.720085		0.467174	0.609049							0.558759			0.099882
																													3.01588		0.350937	0.495235							1.85883			0.177813
																													1.83237		0.49687	0.324711							1.20372			0.174804
																													0.529539		0.44928	0.167529							1.28061			0.197737
																													0.397115		0.457005	0.200192							0.594526			0.243907
																													2.53751		0.400747	0.105457							1.20779			0.238296
																													0.903732		0.382472	0.300397							0.824742			0.079359
																													2.51608		0.527922	0.393371							0.708434			0.110497
																													0.558759		0.348664	0.376963							1.01435			0.366112
																													1.85883		0.403256	0.534833							1.45855			0.300077
																													1.20372		0.402394	0.273066							1.17054			0.187143
																													1.28061		0.35548	0.18209							1.04237			0.126017
																													0.594526		0.551608	0.180453							0.432655			0.15032
																													1.20779		0.545558	0.522151							2.52705			0.231371
																													0.824742		0.696972	0.436309							1.16556			0.574774
																													0.708434		0.586488	0.211973							1.45063			0.225785
																													1.01435		0.508292	0.531001							1.5358			0.140558
																													1.45855		0.587337	0.196826							1.99837
																													1.17054		0.597484	0.36974							1.4757
																													1.04237		0.456073	0.163913							0.994535
																													0.432655		0.528535	0.117584							1.21755
																													2.52705		0.511709	0.094679							2.44818
																													1.16556		0.25848	0.195876							0.354737
																													1.45063		0.495936	0.56056							0.768508
																													1.5358		0.678462	0.250726							0.690327
																													1.99837		0.679893	0.186278							1.49315
																													1.4757		0.706813	0.504787							1.16117
																													0.994535		0.215275	0.29626							0.764375
																													1.21755		0.609627	0.437976							0.420534
																													2.44818		0.395629	0.392356							0.664424
																													0.354737		0.531393	0.654253							0.841334
																													0.768508		0.611263	0.40744							0.635576
																													0.690327		0.566501	0.395592							0.366406
																													1.49315		0.578317	0.396763							0.586874
																													1.16117		0.558105	0.374731							1.23773
																													0.764375		0.569115	0.352133							1.23826
																													0.420534		0.698148	0.199618							1.06179
																													0.664424		0.376808	0.332242							0.935501
																													0.841334		0.219499	0.223011							0.722807
																													0.635576		0.165481	0.537514							0.477202
																													0.366406		0.765964	0.314305							0.810027
																													0.586874		0.199103	0.365401							0.666763
																													1.23773		0.512301	0.437928							0.892667
																													1.23826		0.485021	0.31188							0.72932
																													1.06179		0.138907	0.558469							0.766342
																													0.935501		0.30704	0.287628							1.49223
																													0.722807		0.365075	0.203825							0.641234
																													0.477202		0.453942	0.530806							0.128114
																													0.810027		0.153331	0.341939							1.23626
																													0.666763		0.317792	0.370537							1.2964
																													0.892667		0.182524	0.495653							0.563559
																													0.72932		0.071216	0.25457							0.318214
																													0.766342		0.16309	0.291387							1.08842
																													1.49223		0.213443	0.262845							1.29206
																													0.641234		0.245784	0.196962							1.10967
																													0.128114		0.193638	0.190455							1.63298
																													1.23626		0.070787	0.158397							1.07791
																													1.2964		0.170177	0.285676							0.593544
																													0.563559		0.432417	0.446351							1.55712
																													0.318214		0.282347	0.273765							1.61652
																													1.08842		0.523845	0.488942							1.48299
																													1.29206		0.259625	0.130649							0.458605
																													1.10967		0.203989	0.311306							1.13401
																													1.63298		0.197262	0.24336							0.286935
																													1.07791		0.145667	0.482538							0.396724
																													0.593544		0.670627	0.451566							0.496794
																													1.55712		0.410497	0.215768							1.85756
																													1.61652		0.649669	0.168659							1.4016
																													1.48299		0.624216	0.25692							0.625601
																													0.458605		0.590509	0.351234							0.572589
																													1.13401		0.122382	0.352675							0.326826
																													0.286935		0.543213	0.41491							1.84382
																													0.396724		0.46504	0.3175							1.82315
																													0.496794		0.268508	0.337752							1.0695
																													1.85756		0.190761	0.437621							0.434836
																													1.4016		0.554169	0.878885							0.895133
																													0.625601		0.272782	0.553104							0.901326
																													0.572589		0.150839	0.214446							0.976867
																													0.326826		0.669725	0.259792							1.42139
																													1.84382		0.180009	0.243132							0.82762
																													1.82315		0.355602	0.336212							0.701358
																													1.0695		0.674224	0.327804							0.289645
																													0.434836		0.259476	0.639343							0.376609
																													0.895133		0.100751	0.334175							0.664516
																													0.901326		0.304752	0.462604							1.41241
																													0.976867		0.400717	0.444644							1.39341
																													1.42139		0.400065	0.405421							1.21288
																													0.82762		0.722557	0.241927							0.232091
																													0.701358		0.566415	0.296327							0.229117
																													0.289645		0.791601	0.457682							0.823584
																													0.376609		0.903043	0.512499							0.653157
																													0.664516		0.586088	0.169384							1.22354
																													1.41241		0.29014	0.330922							1.79777
																													1.39341		0.389371	0.299113							0.834063
																													1.21288		0.300523	1.38083							0.743721
																													0.232091		0.461687	0.658402							1.76816
																													0.229117		0.22057	0.596412							1.28051
																													0.823584		0.846989	0.373701							1.8187
																													0.653157		0.302891	0.639739							1.82019
																													1.22354		0.329295	0.619309							1.15575
																													1.79777		0.36311	0.449575							0.932704
																													0.834063		0.388352	0.590577							1.65173
																													0.743721		0.380583	0.400027							1.53547
																													1.76816		0.357514	0.456407							1.59848
																													1.28051		0.14069	0.333391							0.957564
																													1.8187		0.140653	0.345676							1.02195
																													1.82019		0.154605	0.28							0.4202
																													1.15575		0.128441	0.416745							1.3097
																													0.932704		0.124238	0.133864							1.10232
																													1.65173		0.330168	0.41689							0.139205
																													1.53547		0.281083	0.423347							1.4183
																													1.59848		0.254806	0.561064							0.498561
																													0.957564		0.296016	0.344926							0.828244
																													1.02195		0.123967	0.224506							0.290899
																													0.4202		0.113316	0.295618							1.24818
																													1.3097		0.34715	0.326328							1.02411
																													1.10232		0.33829	0.658011							0.763308
																													0.139205		0.340389	0.778391							0.887424
																													1.4183		0.362394	0.631345							0.662699
																													0.498561		0.651439	0.688495							0.381891
																													0.828244		0.600985	0.450222							0.115775
																													0.290899		0.380659	0.577272							1.24558
																													1.24818		0.520917	0.360773							0.98023
																													1.02411		0.734038	0.384186							0.455051
																													0.763308		0.102523	0.68006							1.65057
																													0.887424		0.423286	0.602108							1.20044
																													0.662699		0.67752	0.493348							2.15722
																													0.381891		0.443759	0.339152							1.24369
																													0.115775		0.435805	0.399838							0.136783
																													1.24558		0.444857	0.785548							0.872121
																													0.98023		0.115239	0.849144							0.885692
																													0.455051		0.114222	0.754674							0.884968
																													1.65057		0.422311	0.697068							0.929055
																													1.20044		0.288199	0.550052							0.964181
																													2.15722		0.210753	0.990392							0.139846
																													1.24369		0.387186	0.638557							0.802923
																													0.136783		0.390452	0.392145							1.5532
																													0.872121		0.268087	0.369026							0.775254
																													0.885692		0.565811	0.383717							2.36426
																													0.884968		0.451567	0.426253							2.49171
																													0.929055		0.568965	0.463347							1.26919
																													0.964181		0.129671	0.361624							0.90677
																													0.139846		0.172729	0.269498							1.26896
																													0.802923		0.228948	0.817114							0.663745
																													1.5532		0.583139	0.235993							0.203033
																													0.775254		0.582521	0.38128							0.449653
																													2.36426		0.349096	0.507692							1.2534
																													2.49171		0.514648	0.25959							2.72583
																													1.26919		0.291385	0.335624							2.91736
																													0.90677		0.559963	0.324345							1.83154
																													1.26896		0.936851	0.233556							0.880444
																													0.663745		0.545206	0.295667							0.998969
																													0.203033		0.624456	0.226728							0.592056
																													0.449653		0.332208	0.295381							0.679131
																													1.2534		0.485538	0.363185							0.495954
																													2.72583		0.333054	0.269639							1.51024
																													2.91736		0.348361	0.197154							1.1891
																													1.83154		0.411221	0.422086							1.05138
																													0.880444		0.352392	0.269467							1.63437
																													0.998969		0.061504	0.258202							1.52373
																													0.592056		0.434493	0.207805							1.53577
																													0.679131		0.191825	0.303823							1.48012
																													0.495954		0.170361	0.209375							0.28951
																													1.51024		0.124151	0.163336							1.41047
																													1.1891		0.113339	0.095963							0.278074
																													1.05138		0.119157	0.238298							0.676918
																													1.63437		0.172268	0.145699							0.927753
																													1.52373		0.536348	0.373388							1.11308
																													1.53577		0.12051	1.11881							1.46492
																													1.48012		0.218161	0.320412							1.44622
																													0.28951		0.185632	0.302163							1.53446
																													1.41047		0.187337	0.341087							1.53461
																													0.278074		0.381482	0.34698							0.711302
																													0.676918		0.278527	0.271763							0.164499
																													0.927753		0.111553	0.424113							0.295076
																													1.11308		0.162641	0.414438							0.343009
																													1.46492		0.145918	0.449894							1.58971
																													1.44622		0.28137	0.356091							1.53785
																													1.53446		0.217082	0.348149							1.194
																													1.53461		0.216847	0.286526							0.952283
																													0.711302		0.50659	0.345314							0.75957
																													0.164499		0.202441	0.306257							0.520668
																													0.295076		0.207815	0.441159							0.326795
																													0.343009		0.87775	0.498853							1.21669
																													1.58971		0.270822	0.54847							1.14662
																													1.53785		0.320068	0.266672							1.16231
																													1.194		0.967938	0.283017							1.20127
																													0.952283		0.242053	0.436397							0.896409
																													0.75957		0.168649	0.356148							0.754798
																													0.520668		0.595631	0.374931							0.285471
																													0.326795		0.334891	0.491365							0.349632
																													1.21669		0.327245	0.622325							0.318181
																													1.14662		0.063224	0.51444							0.25742
																													1.16231		0.133486	0.413364							0.240746
																													1.20127		0.207123	0.421152							0.73026
																													0.896409		0.27231	0.33128							0.399164
																													0.754798		0.375904	0.374381							0.304395
																													0.285471		0.225065	0.547103							1.14467
																													0.349632		0.314821	0.469823							1.00395
																													0.318181		0.41703	0.253983							0.909877
																													0.25742		0.156927	0.347906							0.633283
																													0.240746		1.09827	0.323084							0.897874
																													0.73026		0.40237	0.282712							0.363187
																													0.399164		0.358402	0.323454							1.7269
																													0.304395		0.488026	0.129089							1.44027
																													1.14467			0.359349							1.47192
																													1.00395			0.1669							1.45989
																													0.909877			0.217328							1.46337
																													0.633283			0.594191							1.47172
																													0.897874			0.059098							1.4733
																													0.363187			0.270955							0.746354
																													1.7269			0.345055							0.44257
																													1.44027			0.124883							1.15577
																													1.47192			0.134111							0.252167
																													1.45989			0.098248							0.861858
																													1.46337			0.107056							1.91455
																													1.47172			0.381618							1.79166
																													1.4733			0.155638							0.889125
																													0.746354			0.293009							0.876316
																													0.44257			0.19969							1.05176
																													1.15577			0.405474							0.740197
																													0.252167			0.511967							0.338383
																													0.861858			0.12212							1.04247
																													1.91455			0.166694							0.997258
																													1.79166			0.171982							1.04836
																													0.889125			0.104936							1.14658
																													0.876316			0.553166							1.10708
																													1.05176			0.220365							0.789066
																													0.740197			0.229984							0.368906
																													0.338383			0.323789							0.225228
																													1.04247			0.269381							0.442901
																													0.997258			0.126375							0.620742
																													1.04836			0.604552							0.576475
																													1.14658			0.205404							0.248915
																													1.10708			0.167341							0.25748
																													0.789066			0.112883							0.944372
																													0.368906			0.484099							0.839878
																													0.225228			0.156354							0.74951
																													0.442901			0.251427							1.67559
																													0.620742			0.965291							0.826886
																													0.576475			0.781391							0.858847
																													0.248915			0.096141							2.04717
																													0.25748			0.471091							0.513914
																													0.944372			0.433592							0.597717
																													0.839878			0.452858							0.27761
																													0.74951			0.503854							0.560333
																													1.67559			0.220448							1.16016
																													0.826886			0.368125							1.82101
																													0.858847			0.203995							1.28878
																													2.04717			0.207415							0.61474
																													0.513914			0.180569							0.552257
																													0.597717			0.121643							1.8258
																													0.27761			0.110088							0.548812
																													0.560333			0.210121							0.30519
																													1.16016			0.241631							0.876303
																													1.82101			0.930216							1.0376
																													1.28878			0.177496							1.21093
																													0.61474			0.30776							1.14143
																													0.552257			0.248155							0.927603
																													1.8258			0.490504							0.525284
																													0.548812			0.127485							0.613302
																													0.30519			0.408913							0.241241
																													0.876303			0.25734							1.22849
																													1.0376			0.2313							0.548194
																													1.21093			0.511213							1.04138
																													1.14143			0.328061							0.787299
																													0.927603			0.65426							0.510142
																													0.525284			0.317448							0.152831
																													0.613302			0.795178							0.316134
																													0.241241			0.562808							0.145709
																													1.22849			0.592558							0.418752
																													0.548194			0.157075							0.633831
																													1.04138			0.432883							0.681318
																													0.787299			0.127157							0.930103
																													0.510142			0.206492							0.982987
																													0.152831			0.137301							1.07902
																													0.316134			0.128369							0.45734
																													0.145709			0.148917							0.761125
																													0.418752			0.269809							0.957939
																													0.633831			0.318647							1.01477
																													0.681318			0.537146							0.505976
																													0.930103			0.228563							0.828667
																													0.982987			0.243505							0.593022
																													1.07902			0.191143							0.159231
																													0.45734			0.161906							0.202333
																													0.761125			0.079828							0.607459
																													0.957939			0.620162							0.277511
																													1.01477			0.303762							0.36732
																													0.505976			0.254675							0.446954
																													0.828667			0.246685							0.717902
																													0.593022			0.276261							0.480324
																													0.159231			0.461021							0.624009
																													0.202333			0.400184							0.743276
																													0.607459			0.268557							0.591488
																													0.277511			0.242638							1.87876
																													0.36732			0.223939							0.638212
																													0.446954			0.06947							0.643619
																													0.717902			0.099882							0.425143
																													0.480324			0.177813							0.318758
																													0.624009			0.174804							0.255758
																													0.743276			0.197737							1.3899
																													0.591488			0.243907							1.26642
																													1.87876			0.238296							0.863234
																													0.638212			0.079359							0.493982
																													0.643619			0.110497							0.53843
																													0.425143			0.366112							0.548879
																													0.318758			0.300077							0.591115
																													0.255758			0.187143							0.539889
																													1.3899			0.126017							0.727297
																													1.26642			0.15032							0.85465
																													0.863234			0.231371							0.629846
																													0.493982			0.574774							0.609
																													0.53843			0.225785							0.183924
																													0.548879			0.140558							0.925549
																													0.591115										0.706951
																													0.539889										0.726645
																													0.727297										0.407246
																													0.85465										1.0788
																													0.629846										1.30165
																													0.609										0.35474
																													0.183924										0.620461
																													0.925549										0.991753
																													0.706951										1.33314
																													0.726645										1.42376
																													0.407246										1.3709
																													1.0788										1.92622
																													1.30165										0.823492
																													0.35474										0.290586
																													0.620461										1.37463
																													0.991753										1.70886
																													1.33314										0.634287
																													1.42376										0.666093
																													1.3709										1.24301
																													1.92622										1.04808
																													0.823492										1.89546
																													0.290586										1.19883
																													1.37463										1.39971
																													1.70886										1.07583
																													0.634287										1.98439
																													0.666093										0.788344
																													1.24301										1.44177
																													1.04808										1.09193
																													1.89546										0.459614
																													1.19883										0.749211
																													1.39971										0.638008
																													1.07583										1.53869
																													1.98439										0.532612
																													0.788344										1.27446
																													1.44177										0.47901
																													1.09193										1.78113
																													0.459614										1.93293
																													0.749211										1.44583
																													0.638008										0.537847
																													1.53869										1.30335
																													0.532612										0.719745
																													1.27446										0.623895
																													0.47901										1.26027
																													1.78113										1.65369
																													1.93293										2.44447
																													1.44583										0.174838
																													0.537847										2.47918
																													1.30335										2.84251
																													0.719745										0.807545
																													0.623895										1.02006
																													1.26027										0.940607
																													1.65369										1.02529
																													2.44447										0.99368
																													0.174838										0.661387
																													2.47918										0.860885
																													2.84251										0.326894
																													0.807545										1.15918
																													1.02006										1.51932
																													0.940607										0.661777
																													1.02529										1.02676
																													0.99368										0.228613
																													0.661387										0.721644
																													0.860885										1.34201
																													0.326894										1.1234
																													1.15918										1.84112
																													1.51932										0.132724
																													0.661777										0.500869
																													1.02676										1.30203
																													0.228613										0.962724
																													0.721644										0.819411
																													1.34201										1.09016
																													1.1234										0.885454
																													1.84112										0.839893
																													0.132724										0.981555
																													0.500869										1.27669
																													1.30203										0.271572
																													0.962724										0.743423
																													0.819411										0.559427
																													1.09016										0.389856
																													0.885454										0.165077
																													0.839893										0.163879
																													0.981555										0.254576
																													1.27669										1.34141
																													0.271572										1.51318
																													0.743423										1.0357
																													0.559427										0.583454
																													0.389856										0.428365
																													0.165077										0.860104
																													0.163879										0.530259
																													0.254576										0.741569
																													1.34141										0.593553
																													1.51318										1.14599
																													1.0357										0.578582
																													0.583454										1.29799
																													0.428365										0.57082
																													0.860104										1.21366
																													0.530259										1.85668
																													0.741569										0.548
																													0.593553										0.505536
																													1.14599										1.63396
																													0.578582										1.18429
																													1.29799										0.489795
																													0.57082										1.52312
																													1.21366										0.412247
																													1.85668										0.324023
																													0.548										0.306826
																													0.505536										0.571775
																													1.63396										0.717391
																													1.18429										0.428594
																													0.489795										0.705759
																													1.52312										0.586867
																													0.412247										0.919898
																													0.324023										1.46839
																													0.306826										0.445336
																													0.571775										2.02789
																													0.717391										2.26365
																													0.428594										0.155696
																													0.705759										0.328151
																													0.586867										0.552677
																													0.919898										1.10713
																													1.46839										0.556275
																													0.445336										1.95415
																													2.02789										0.276675
																													2.26365										0.187615
																													0.155696										0.359802
																													0.328151										0.393751
																													0.552677										1.86013
																													1.10713										0.416827
																													0.556275										0.403135
																													1.95415										1.38463
																													0.276675										0.441533
																													0.187615										1.60249
																													0.359802										0.960547
																													0.393751										0.230766
																													1.86013										0.662675
																													0.416827										0.465762
																													0.403135										0.872481
																													1.38463										0.539504
																													0.441533										1.76683
																													1.60249										1.03294
																													0.960547										0.775515
																													0.230766										0.846788
																													0.662675										0.396276
																													0.465762										0.4794
																													0.872481										0.59075
																													0.539504										0.945802
																													1.76683										0.245931
																													1.03294										0.260094
																													0.775515										0.197139
																													0.846788										0.874637
																													0.396276										0.819967
																													0.4794										1.8914
																													0.59075										1.3771
																													0.945802										1.51327
																													0.245931										1.39806
																													0.260094										1.16888
																													0.197139										1.10631
																													0.874637										0.552386
																													0.819967										0.684953
																													1.8914										0.914287
																													1.3771										0.902923
																													1.51327										1.23796
																													1.39806										0.957711
																													1.16888										1.19212
																													1.10631										1.62481
																													0.552386										0.920677
																													0.684953										1.10325
																													0.914287										0.594634
																													0.902923										0.77987
																													1.23796										1.03276
																													0.957711										0.463251
																													1.19212										0.422933
																													1.62481										0.433399
																													0.920677										0.260748
																													1.10325										1.59428
																													0.594634										0.949009
																													0.77987										1.5623
																													1.03276										0.35656
																													0.463251										0.669277
																													0.422933										0.254498
																													0.433399										0.337548
																													0.260748										0.332659
																													1.59428										0.35864
																													0.949009										0.751646
																													1.5623										0.464363
																													0.35656										0.304882
																													0.669277										0.361691
																													0.254498										0.582217
																													0.337548										0.806159
																													0.332659										0.487532
																													0.35864										1.14764
																													0.751646										0.420097
																													0.464363										0.317938
																													0.304882										1.00355
																													0.361691										1.05899
																													0.582217										0.464665
																													0.806159										0.570951
																													0.487532										0.419471
																													1.14764										0.767425
																													0.420097										0.461954
																													0.317938										0.384547
																													1.00355										1.65576
																													1.05899										0.736528
																													0.464665										0.651187
																													0.570951										0.561545
																													0.419471										0.510542
																													0.767425										0.350639
																													0.461954										0.845063
																													0.384547										0.491829
																													1.65576										0.939329
																													0.736528										0.76284
																													0.651187										0.882845
																													0.561545										0.768845
																													0.510542										1.21225
																													0.350639										0.384792
																													0.845063										0.268166
																													0.491829										0.184805
																													0.939329										0.296805
																													0.76284										1.56185
																													0.882845										1.43023
																													0.768845										1.08453
																													1.21225										1.39352
																													0.384792										0.466219
																													0.268166										0.765847
																													0.184805										0.127193
																													0.296805										0.233565
																													1.56185										0.931312
																													1.43023										0.492683
																													1.08453										0.302006
																													1.39352										0.331243
																													0.466219										1.15829
																													0.765847										1.30377
																													0.127193										1.1807
																													0.233565										0.970473
																													0.931312										1.28384
																													0.492683										1.26176
																													0.302006										0.28797
																													0.331243										0.669061
																													1.15829										0.545681
																													1.30377										0.481087
																													1.1807										0.352059
																													0.970473										0.45212
																													1.28384										0.122355
																													1.26176										0.210123
																													0.28797										0.573887
																													0.669061										0.552063
																													0.545681										0.405533
																													0.481087										1.287
																													0.352059										0.888692
																													0.45212										1.02676
																													0.122355										0.659314
																													0.210123										0.332286
																													0.573887										0.498158
																													0.552063										1.73062
																													0.405533										1.44364
																													1.287										0.317681
																													0.888692										0.597013
																													1.02676										0.708443
																													0.659314										0.157978
																													0.332286										0.842055
																													0.498158										0.852247
																													1.73062										0.543109
																													1.44364										0.64705
																													0.317681										0.957978
																													0.597013										1.6692
																													0.708443										1.44972
																													0.157978										1.04254
																													0.842055										0.360864
																													0.852247										0.755577
																													0.543109										0.890393
																													0.64705										0.757595
																													0.957978										0.383464
																													1.6692										0.451198
																													1.44972										0.850996
																													1.04254										1.05881
																													0.360864										0.995401
																													0.755577										0.970827
																													0.890393										1.31731
																													0.757595										0.804887
																													0.383464										1.13118
																													0.451198										1.26772
																													0.850996										0.243867
																													1.05881										0.221615
																													0.995401										1.0697
																													0.970827										0.492865
																													1.31731										1.03686
																													0.804887										0.133857
																													1.13118										0.093587
																													1.26772										0.770741
																													0.243867										1.16989
																													0.221615										0.716286
																													1.0697										0.625513
																													0.492865										0.723715
																													1.03686										0.665255
																													0.133857										0.717754
																													0.093587										0.471032
																													0.770741										0.757687
																													1.16989										0.506148
																													0.716286										0.913348
																													0.625513										0.766251
																													0.723715										0.466592
																													0.665255										0.266035
																													0.717754										0.219756
																													0.471032										0.910914
																													0.757687										0.159879
																													0.506148										0.326194
																													0.913348										1.03994
																													0.766251										0.462245
																													0.466592										0.805634
																													0.266035										0.897039
																													0.219756										0.633383
																													0.910914										0.674435
																													0.159879										1.5658
																													0.326194										0.235691
																													1.03994										0.814436
																													0.462245										0.604099
																													0.805634										1.12428
																													0.897039										1.5509
																													0.633383										1.84218
																													0.674435										0.610897
																													1.5658										1.30828
																													0.235691										2.1472
																													0.814436										2.05687
																													0.604099										1.14847
																													1.12428										2.79592
																													1.5509										1.97722
																													1.84218										0.759517
																													0.610897										0.490417
																													1.30828										0.610991
																													2.1472										0.971695
																													2.05687										0.333123
																													1.14847										1.72116
																													2.79592										1.0006
																													1.97722										1.85885
																													0.759517										1.408
																													0.490417										1.7962
																													0.610991										0.938035
																													0.971695										0.697431
																													0.333123										1.0301
																													1.72116										0.707853
																													1.0006										0.553267
																													1.85885										1.24662
																													1.408										0.693381
																													1.7962										0.807686
																													0.938035										0.384153
																													0.697431										1.50759
																													1.0301										0.45251
																													0.707853										1.35613
																													0.553267										0.99784
																													1.24662										0.967309
																													0.693381										0.670954
																													0.807686										0.664046
																													0.384153										0.785605
																													1.50759										1.7601
																													0.45251										0.246335
																													1.35613										0.150646
																													0.99784										0.123978
																													0.967309										1.36088
																													0.670954										0.934878
																													0.664046										0.511825
																													0.785605										0.168207
																													1.7601										1.1584
																													0.246335										1.1618
																													0.150646										1.13915
																													0.123978										0.229055
																													1.36088										0.647955
																													0.934878										1.02293
																													0.511825										0.181453
																													0.168207										0.624974
																													1.1584										0.218993
																													1.1618										1.74592
																													1.13915										2.34823
																													0.229055										1.28389
																													0.647955										0.995962
																													1.02293										0.408623
																													0.181453										0.965541
																													0.624974										0.3793
																													0.218993										1.63831
																													1.74592										0.886886
																													2.34823										1.05161
																													1.28389										0.267259
																													0.995962										1.05585
																													0.408623										0.452576
																													0.965541										0.60748
																													0.3793										0.271267
																													1.63831										0.205548
																													0.886886										1.57166
																													1.05161										1.51764
																													0.267259										0.396128
																													1.05585										0.928918
																													0.452576										0.904518
																													0.60748										1.04606
																													0.271267										1.66157
																													0.205548										1.82601
																													1.57166										1.3416
																													1.51764										1.82532
																													0.396128										1.72442
																													0.928918										1.40717
																													0.904518										0.82466
																													1.04606										0.303446
																													1.66157										0.27018
																													1.82601										0.410413
																													1.3416										0.237343
																													1.82532										0.630413
																													1.72442										0.419148
																													1.40717										2.56498
																													0.82466										0.754705
																													0.303446										0.191519
																													0.27018										0.595454
																													0.410413										0.619085
																													0.237343										0.656951
																													0.630413										2.432
																													0.419148										1.90872
																													2.56498										1.3504
																													0.754705										0.733737
																													0.191519										0.701111
																													0.595454										0.204184
																													0.619085										0.194643
																													0.656951										0.313208
																													2.432										0.375071
																													1.90872										0.395412
																													1.3504										0.798301
																													0.733737										2.14182
																													0.701111										1.33667
																													0.204184										0.640604
																													0.194643										1.24348
																													0.313208										1.09
																													0.375071										1.18541
																													0.395412										0.996275
																													0.798301										0.356726
																													2.14182										1.18363
																													1.33667										0.937369
																													0.640604										0.953799
																													1.24348										1.50078
																													1.09										1.20586
																													1.18541										0.058286
																													0.996275										0.340794
																													0.356726										0.276481
																													1.18363										2.87221
																													0.937369										0.429969
																													0.953799										0.669164
																													1.50078										0.851234
																													1.20586										0.492594
																													0.058286										1.18625
																													0.340794										1.23926
																													0.276481										0.721656
																													2.87221										0.56234
																													0.429969										0.155067
																													0.669164										0.80559
																													0.851234										0.424517
																													0.492594										0.505704
																													1.18625										0.968335
																													1.23926										0.65772
																													0.721656										0.578881
																													0.56234										0.155733
																													0.155067										0.291438
																													0.80559										0.960438
																													0.424517										0.758225
																													0.505704										0.732803
																													0.968335										0.188632
																													0.65772										0.392082
																													0.578881										0.729412
																													0.155733										0.26116
																													0.291438										1.03005
																													0.960438										0.174777
																													0.758225										1.19155
																													0.732803										1.84777
																													0.188632										0.364154
																													0.392082										0.838891
																													0.729412										0.804969
																													0.26116										0.395007
																													1.03005										0.345891
																													0.174777										0.214928
																													1.19155										0.288912
																													1.84777										0.688595
																													0.364154										0.786673
																													0.838891										0.512953
																													0.804969										0.330966
																													0.395007										1.79272
																													0.345891										1.4246
																													0.214928										0.517101
																													0.288912										1.03671
																													0.688595										0.894973
																													0.786673										0.774165
																													0.512953										0.890055
																													0.330966										0.96777
																													1.79272										0.955765
																													1.4246										1.12216
																													0.517101										0.955486
																													1.03671										1.51855
																													0.894973										0.782765
																													0.774165										0.442007
																													0.890055										0.380224
																													0.96777										0.323049
																													0.955765										0.480261
																													1.12216										2.69005
																													0.955486										0.836246
																													1.51855										2.51399
																													0.782765										1.15745
																													0.442007										0.675139
																													0.380224										0.864343
																													0.323049										0.900845
																													0.480261										0.486686
																													2.69005										0.475294
																													0.836246										0.090159
																													2.51399										1.61448
																													1.15745										2.15882
																													0.675139										0.83674
																													0.864343										1.76716
																													0.900845										1.5255
																													0.486686										3.56592
																													0.475294										0.536912
																													0.090159										0.418486
																													1.61448										1.75264
																													2.15882										1.63058
																													0.83674										1.73753
																													1.76716										1.90128
																													1.5255										1.30445
																													3.56592										1.03949
																													0.536912										0.304776
																													0.418486										0.308998
																													1.75264										0.354809
																													1.63058										0.348512
																													1.73753										0.21479
																													1.90128										1.07464
																													1.30445										0.540079
																													1.03949										2.74336
																													0.304776										2.61637
																													0.308998										0.619959
																													0.354809										0.626663
																													0.348512										0.786156
																													0.21479										2.34577
																													1.07464										3.76136
																													0.540079										0.85521
																													2.74336										1.8421
																													2.61637										0.804778
																													0.619959										1.20925
																													0.626663										2.07031
																													0.786156										1.67478
																													2.34577										1.42601
																													3.76136										1.80501
																													0.85521										1.0943
																													1.8421										0.405053
																													0.804778										1.76975
																													1.20925										1.1777
																													2.07031										0.936368
																													1.67478										0.737614
																													1.42601										1.22053
																													1.80501										1.37074
																													1.0943										1.54988
																													0.405053										1.6365
																													1.76975										1.42014
																													1.1777										0.720617
																													0.936368										0.553545
																													0.737614										1.62193
																													1.22053										0.676835
																													1.37074										1.55931
																													1.54988										0.976869
																													1.6365										0.582016
																													1.42014										1.45412
																													0.720617										1.76049
																													0.553545										2.29389
																													1.62193										0.420353
																													0.676835										2.33745
																													1.55931										2.2193
																													0.976869										0.562209
																													0.582016										1.69071
																													1.45412										1.74647
																													1.76049										1.51797
																													2.29389										0.240361
																													0.420353										0.160768
																													2.33745										1.74177
																													2.2193										1.08635
																													0.562209										0.460973
																													1.69071										1.95702
																													1.74647										1.48639
																													1.51797										0.577967
																													0.240361										1.28303
																													0.160768										1.5559
																													1.74177										0.340806
																													1.08635										0.725721
																													0.460973										1.33294
																													1.95702										0.481572
																													1.48639										0.394094
																													0.577967										0.27409
																													1.28303										1.64426
																													1.5559										0.260085
																													0.340806										0.100271
																													0.725721										0.201946
																													1.33294										0.881491
																													0.481572										1.11919
																													0.394094										1.07049
																													0.27409										0.351881
																													1.64426										0.775496
																													0.260085										0.889877
																													0.100271										0.874248
																													0.201946										0.134353
																													0.881491										0.279594
																													1.11919										0.134878
																													1.07049										0.148237
																													0.351881										0.654684
																													0.775496										0.982091
																													0.889877										1.17648
																													0.874248										0.830082
																													0.134353										0.632015
																													0.279594										0.265248
																													0.134878										2.00809
																													0.148237										0.545206
																													0.654684										0.694088
																													0.982091										0.210448
																													1.17648										1.58396
																													0.830082										1.60458
																													0.632015										0.874558
																													0.265248										1.8441
																													2.00809										0.107158
																													0.545206										0.247024
																													0.694088										0.214552
																													0.210448										1.31025
																													1.58396										0.293162
																													1.60458										0.521448
																													0.874558										0.687655
																													1.8441										0.982891
																													0.107158										1.86907
																													0.247024										1.04593
																													0.214552										0.164578
																													1.31025										0.772766
																													0.293162										0.539975
																													0.521448										0.337014
																													0.687655										0.714499
																													0.982891										0.04436
																													1.86907										0.135042
																													1.04593										0.395924
																													0.164578										0.318459
																													0.772766										0.1577
																													0.539975										0.191021
																													0.337014										0.273178
																													0.714499										0.172621
																													0.04436										0.456356
																													0.135042										0.535547
																													0.395924										0.350875
																													0.318459										0.54419
																													0.1577										0.308979
																													0.191021										0.162666
																													0.273178										0.090581
[truncated: 11 more rows]

## Sheet: Tl Histo
		Int6_full network												Int6_Fault															Int6_Fract
		Full network				Fault				Fract				Full network					Fault network					Fracture network					Full network					Fault network					Fracture network
	Bin	Set 0	Set 1	Set 2	Set 3	Set 0	Set 1	Set2	Set 3	Set 0	Set 2	Set 3	Set 4	Set0	Set1	Set2	Set3	Set4	Set0	Set1	Set2	Set3	Set4	Set0	Set1	Set2	Set3	Set4	Set0	Set1	Set2	Set3	Set4	Set0	Set1	Set2	Set3	Set4	Set0	Set1	Set2	Set3	Set4
	0	0	0	0	0	0		0	0	0	0	0	0	0	0	0	0	0		0	0	0	0	0	0	0	0	0	0	0	0	0	0	0	0	0	0	0	0	0	0	0	0
	0.5	6	16	71	39	0		0	5	6	16	71	34	85	60	125	172	80		0	1	0	1	85	60	124	172	79	646	303	640	822	290	1	4	20	29	13	645	299	620	792	277
	1	9	19	153	41	0		2	15	9	19	151	26	197	56	269	156	70		1	11	3	2	197	55	258	153	68	697	134	334	279	99	3	14	82	59	32	694	120	252	220	67
	1.5	6	11	92	26	0		6	17	6	11	86	9	163	31	103	57	29		2	12	6	1	163	29	91	51	28	371	49	103	102	24	1	14	86	68	16	369	35	17	34	8
	2	6	6	33	23	0		0	21	6	6	33	2	100	14	53	30	13		0	9	8	4	100	14	44	22	9	179	16	53	53	16	1	9	45	46	13	178	7	8	7	3
	2.5	6	7	27	9	0		3	4	6	7	24	5	70	10	23	13	6		0	6	4	2	70	10	17	9	4	57	3	50	25	7	0	2	47	24	7	57	1	3	1	0
	3	10	4	15	5	0		1	5	10	4	14	0	54	1	18	7	3		0	5	5	1	54	1	13	2	2	31	2	19	19	3	1	0	16	18	3	30	2	3	1	0
	3.5	12	2	4	7	1		0	5	12	2	4	2	27	0	8	4	2		0	5	2	1	27	0	3	2	1	12	0	12	5	2	0	0	12	4	2	12	0	0	1	0
	4	12	2	7	3	0		0	3	11	2	7	0	30	1	6	3	0		0	3	3	0	30	1	3	0	0	3	0	7	8	0	0	0	7	8	0	3	0	0	0	0
	4.5	3	2	3	6	0		1	6	3	2	2	0	12	1	10	5	2		0	8	4	0	12	1	2	1	2	6	1	8	12	4	0	1	8	12	4	6	0	0	0	0
	5	7	0	2	1	0		0	1	7	0	2	0	10	0	5	1	0		0	4	1	0	10	0	1	0	0	2	0	5	2	1	0	0	5	2	1	2	0	0	0	0
	5.5	4	1	4	0	0		0	0	4	1	4	0	10	0	4	1	0			2	1	0	10	0	2	0	0	4	0	3	5	0	0	0	3	5	0	4	0	0	0	0
	6	9	0	1	1	0		0	1	9	0	1	0	9	0	1	1	0			1	1	0	9	0	0	0	0	0	0	0	4	1	0	0	0	4	1	0	0	0	0	0
	6.5	5	0	0	0	0		0	0	5	0	0	0	6	0	6	0	0			4	0	0	6	0	2	0	0	0	0	4	1	0	0	0	4	1	0	0	0	0	0	0
	7	3	0	0	0	0		0	0	3	0	0	0	6	0	3	1	0			2	1	0	6	0	1	0	0	0	1	3	3	0	0	1	3	3	0	0	0	0	0	0
	7.5	6	1	3	0	0		2	0	6	1	1	0	4	0	0	1	0			0	1	0	4	0	0	0	0	0	0	1	2	0	0	0	1	2	0	0	0	0	0	0
	8	2	0	0	1	0		0	1	2	0	0	0	1	0	0	1	0			0	1	0	1	0	0	0	0	0	0	0	0	0	0	0	0	0	0	0	0	0	0	0
	8.5	4	0	0	0	0		0	0	4	0	0	0	0	0	0	0	0			0	0	0	0	0	0	0	0	0	0	1	3	1	0	0	1	3	1	0	0	0	0	0
	9	1	0	0	1	0		0	1	1	0	0	0	0	0	0	1	0			0	1	0	0	0	0	0	0	0	0	0	0	0	0	0	0	0	0	0	0	0	0	0
	9.5	3	0	0	1	0		0	1	3	0	0	0	2	0	0	0	0			0	0	0	2	0	0	0	0	0	0	1	2	0	0	0	1	2	0	0	0	0	0	0
	10	3	1	0	0	0		0	0	3	1	0	0	1	0	1	0	0			1	0	0	1	0	0	0	0	0	0	0	1	0	0	0	0	1	0	0	0	0	0	0
	10.5	4	0	0	0	0		0	0	4	0	0	0	2	0	0	0	0			0	0	0	2	0	0	0	0	0	0	0	0	0	0	0	0	0	0	0	0	0	0	0
	11	4	0	0	0	0		0	0	4	0	0	0	0	0	0	0	0			0	0	0	0	0	0	0	0	0	0	0	1	0	0	0	0	1	0	0	0	0	0	0
	11.5	0	0	0	0	0		0	0	0	0	0	0	0	0	0	0	0			0	0	0	0	0	0	0	0	0	0	0	1	0	0	0	0	1	0	0	0	0	0	0
	12	2	0	0	0	0		0	0	2	0	0	0	0	0	0	0	0			0	0	0	0	0	0	0	0	0	0	0	1	0	0	0	0	1	0	0	0	0	0	0
	12.5	3	0	0	0	0		0	0	3	0	0	0	0	0	0	0	0			0	0	0	0	0	0	0	0	0	0	0	0	0	0	0	0	0	0	0	0	0	0	0
	13	1	0	0	0	0		0	0	1	0	0	0	0	0	0	0	0			0	0	0	0	0	0	0	0	0	0	0	0	0	0	0	0	0	0	0	0	0	0	0
	13.5	1	0	0	0	0		0	0	1	0	0	0	0	0	1	0	0			1	0	0	0	0	0	0	0	0	0	0	0	0	0	0	0	0	0	0	0	0	0	0
	14	0	0	0	0	0		0	0	0	0	0	0	0	0	0	0	0			0	0	0	0	0	0	0	0	0	0	0	0	0	0	0	0	0	0	0	0	0	0	0
	14.5	0	0	0	0	0		0	0	0	0	0	0	0	0	0	0	0			0	0	0	0	0	0	0	0	0	0	0	0	0	0	0	0	0	0	0	0	0	0	0
	15	1	0	0	0	0		0	0	1	0	0	0	0	0	0	0	0			0	0	0	0	0	0	0	0	0	0	0	1	0	0	0	0	1	0	0	0	0	0	0
	15.5	0	0	0	0	0		0	0	0	0	0	0	0	0	0	0	0			0	0	0	0	0	0	0	0	0	0	0	1	0	0	0	0	1	0	0		0	0	0
	16	0	0	0	0	0		0	0	0	0	0	0	0	0	0	0	0			0	0	0	0	0	0	0	0	0	0	0	0	0	0	0	0	0	0	0		0	0	0
	16.5	0	0	0	0	0		0	0	0	0	0	0	0	0	0	0	0			0	0		0	0	0	0	0	0	0	0	0	0	0	0	0	0	0	0		0		0
	17	0	0	0	0	0		0	0	0	0	0	0	0	0	0	0	0			0	0		0	0	0	0	0	0		0	0		0	0	0		0	0		0		0
	More	0	0	0	0	0		0		0	0	0	0	0	0	0	0				0			0	0	0	0					0		0		0					0
		Int6_full network												Int6_Fault															Int6_Fract
		Full network				Fault				Fract				Full network					Fault network					Fracture network					Full network					Fault network					Fracture network
	Bin	Set 0	Set 1	Set 2	Set 3	Set 0	Set 1	Set2	Set 3	Set 0	Set 2	Set 3	Set 4	Set0	Set1	Set2	Set3	Set4	Set0	Set1	Set2	Set3	Set4	Set0	Set1	Set2	Set3	Set4	Set0	Set1	Set2	Set3	Set4	Set0	Set1	Set2	Set3	Set4	Set0	Set1	Set2	Set3	Set4
	0	0	0	0	0			0	0	0	0	0	0	0	0	0	0	0		0	0	0	0	0	0	0	0	0	0	0	0	0	0	0	0	0	0	0	0	0	0	0	0
	0.5	0.0451128	0.222222	0.171084	0.237805			0	0.0581395	0.0454545	0.222222	0.1775	0.435897	0.107731	0.344828	0.196541	0.378855	0.390244		0	0.0133333	0	0.0833333	0.107731	0.350877	0.221034	0.417476	0.409326	0.321713	0.595285	0.514469	0.607539	0.647321	0.142857	0.0888889	0.058651	0.097973	0.139785	0.3225	0.644397	0.6866	0.75	0.780282
	1	0.0676692	0.263889	0.368675	0.25			0.133333	0.174419	0.0681818	0.263889	0.3775	0.333333	0.249683	0.321839	0.422956	0.343612	0.341463		0.333333	0.146667	0.0714286	0.166667	0.249683	0.321637	0.459893	0.371359	0.352332	0.347112	0.263261	0.268489	0.206208	0.220982	0.428571	0.311111	0.240469	0.199324	0.344086	0.347	0.258621	0.27907	0.208333	0.188732
	1.5	0.0451128	0.152778	0.221687	0.158537			0.4	0.197674	0.0454545	0.152778	0.215	0.115385	0.206591	0.178161	0.16195	0.125551	0.141463		0.666667	0.16	0.142857	0.0833333	0.206591	0.169591	0.16221	0.123786	0.145078	0.184761	0.0962672	0.0827974	0.075388	0.0535714	0.142857	0.311111	0.252199	0.22973	0.172043	0.1845	0.075431	0.0188261	0.032197	0.0225352
	2	0.0451128	0.0833333	0.0795181	0.140244			0	0.244186	0.0454545	0.0833333	0.0825	0.025641	0.126743	0.0804598	0.0833333	0.0660793	0.0634146		0	0.12	0.190476	0.333333	0.126743	0.0818713	0.0784314	0.0533981	0.0466321	0.0891434	0.0314342	0.0426045	0.0391722	0.0357143	0.142857	0.2	0.131965	0.155405	0.139785	0.089	0.0150862	0.00885936	0.00662879	0.0084507
	2.5	0.0451128	0.0972222	0.0650602	0.054878			0.2	0.0465116	0.0454545	0.0972222	0.06	0.0641026	0.0887199	0.0574713	0.0361635	0.0286344	0.0292683		0	0.08	0.0952381	0.166667	0.0887199	0.0584795	0.030303	0.0218447	0.0207254	0.0283865	0.00589391	0.0401929	0.0184775	0.015625	0	0.0444444	0.13783	0.0810811	0.0752688	0.0285	0.00215517	0.00332226	0.00094697	0
	3	0.075188	0.0555556	0.0361446	0.0304878			0.0666667	0.0581395	0.0757576	0.0555556	0.035	0	0.0684411	0.00574713	0.0283019	0.0154185	0.0146341		0	0.0666667	0.119048	0.0833333	0.0684411	0.00584795	0.0231729	0.00485437	0.0103627	0.0154382	0.00392927	0.0152733	0.0140429	0.00669643	0.142857	0	0.0469208	0.0608108	0.0322581	0.015	0.00431034	0.00332226	0.00094697	0
	3.5	0.0902256	0.0277778	0.00963855	0.0426829			0	0.0581395	0.0909091	0.0277778	0.01	0.025641	0.0342205	0	0.0125786	0.00881057	0.0097561		0	0.0666667	0.047619	0.0833333	0.0342205	0	0.00534759	0.00485437	0.00518135	0.0059761	0	0.0096463	0.00369549	0.00446429	0	0	0.0351906	0.0135135	0.0215054	0.006	0	0	0.00094697	0
	4	0.0902256	0.0277778	0.0168675	0.0182927			0	0.0348837	0.0833333	0.0277778	0.0175	0	0.0380228	0.00574713	0.00943396	0.00660793	0		0	0.04	0.0714286	0	0.0380228	0.00584795	0.00534759	0	0	0.00149402	0	0.00562701	0.00591279	0	0	0	0.0205279	0.027027	0	0.0015	0	0	0	0
	4.5	0.0225564	0.0277778	0.00722892	0.0365854			0.0666667	0.0697674	0.0227273	0.0277778	0.005	0	0.0152091	0.00574713	0.0157233	0.0110132	0.0097561		0	0.106667	0.0952381	0	0.0152091	0.00584795	0.00356506	0.00242718	0.0103627	0.00298805	0.00196464	0.00643087	0.00886918	0.00892857	0	0.0222222	0.0234604	0.0405405	0.0430108	0.003	0	0	0	0
	5	0.0526316	0	0.00481928	0.00609756			0	0.0116279	0.0530303	0	0.005	0	0.0126743	0	0.00786164	0.00220264	0		0	0.0533333	0.0238095	0	0.0126743	0	0.00178253	0	0	0.000996016	0	0.00401929	0.0014782	0.00223214	0	0	0.0146628	0.00675676	0.0107527	0.001	0	0	0	0
	5.5	0.0300752	0.0138889	0.00963855	0			0	0	0.030303	0.0138889	0.01	0	0.0126743	0	0.00628931	0.00220264	0		0	0.0266667	0.0238095	0	0.0126743	0	0.00356506	0	0	0.00199203	0	0.00241158	0.00369549	0	0	0	0.00879765	0.0168919	0	0.002	0	0	0	0
	6	0.0676692	0	0.00240964	0.00609756			0	0.0116279	0.0681818	0	0.0025	0	0.0114068	0	0.00157233	0.00220264	0		0	0.0133333	0.0238095	0	0.0114068	0	0	0	0	0	0	0	0.00295639	0.00223214	0	0	0	0.0135135	0.0107527	0	0	0	0	0
	6.5	0.037594	0	0	0			0	0	0.0378788	0	0	0	0.00760456	0	0.00943396	0	0		0	0.0533333	0	0	0.00760456	0	0.00356506	0	0	0	0	0.00321543	0.000739098	0	0	0	0.0117302	0.00337838	0	0	0	0	0	0
	7	0.0225564	0	0	0			0	0	0.0227273	0	0	0	0.00760456	0	0.00471698	0.00220264	0		0	0.0266667	0.0238095	0	0.00760456	0	0.00178253	0	0	0	0.00196464	0.00241158	0.00221729	0	0	0.0222222	0.00879765	0.0101351	0	0	0	0	0	0
	7.5	0.0451128	0.0138889	0.00722892	0			0.133333	0	0.0454545	0.0138889	0.0025	0	0.00506971	0	0	0.00220264	0		0	0	0.0238095	0	0.00506971	0	0	0	0	0	0	0.000803859	0.0014782	0	0	0	0.00293255	0.00675676	0	0	0	0	0	0
	8	0.0150376	0	0	0.00609756			0	0.0116279	0.0151515	0	0	0	0.00126743	0	0	0.00220264	0		0	0	0.0238095	0	0.00126743	0	0	0	0	0	0	0	0	0	0	0	0	0	0	0	0	0	0	0
	8.5	0.0300752	0	0	0			0	0	0.030303	0	0	0	0	0	0	0	0		0	0	0	0	0	0	0	0	0	0	0	0.000803859	0.00221729	0.00223214	0	0	0.00293255	0.0101351	0.0107527	0	0	0	0	0
	9	0.0075188	0	0	0.00609756			0	0.0116279	0.00757576	0	0	0	0	0	0	0.00220264	0		0	0	0.0238095	0	0	0	0	0	0	0	0	0	0	0	0	0	0	0	0	0	0	0	0	0
	9.5	0.0225564	0	0	0.00609756			0	0.0116279	0.0227273	0	0	0	0.00253485	0	0	0	0		0	0	0	0	0.00253485	0	0	0	0	0	0	0.000803859	0.0014782	0	0	0	0.00293255	0.00675676	0	0	0	0	0	0
	10	0.0225564	0.0138889	0	0			0	0	0.0227273	0.0138889	0	0	0.00126743	0	0.00157233	0	0		0	0.0133333	0	0	0.00126743	0	0	0	0	0	0	0	0.000739098	0	0	0	0	0.00337838	0	0	0	0	0	0
	10.5	0.0300752	0	0	0			0	0	0.030303	0	0	0	0.00253485	0	0	0	0		0	0	0	0	0.00253485	0	0	0	0	0	0	0	0	0	0	0	0	0	0	0	0	0	0	0
	11	0.0300752	0	0	0			0	0	0.030303	0	0	0	0	0	0	0	0		0	0	0	0	0	0	0	0	0	0	0	0	0.000739098	0	0	0	0	0.00337838	0	0	0	0	0	0
	11.5	0	0	0	0			0	0	0	0	0	0	0	0	0	0	0		0	0	0	0	0	0	0	0	0	0	0	0	0.000739098	0	0	0	0	0.00337838	0	0	0	0	0	0
	12	0.0150376	0	0	0			0	0	0.0151515	0	0	0	0	0	0	0	0		0	0	0	0	0	0	0	0	0	0	0	0	0.000739098	0	0	0	0	0.00337838	0	0	0	0	0	0
	12.5	0.0225564	0	0	0			0	0	0.0227273	0	0	0	0	0	0	0	0		0	0	0	0	0	0	0	0	0	0	0	0	0	0	0	0	0	0	0	0	0	0	0	0
	13	0.0075188	0	0	0			0	0	0.00757576	0	0	0	0	0	0	0	0		0	0	0	0	0	0	0	0	0	0	0	0	0	0	0	0	0	0	0	0	0	0	0	0
	13.5	0.0075188	0	0	0			0	0	0.00757576	0	0	0	0	0	0.00157233	0	0		0	0.0133333	0	0	0	0	0	0	0	0	0	0	0	0	0	0	0	0	0	0	0	0	0	0
	14	0	0	0	0			0	0	0	0	0	0	0	0	0	0	0		0	0	0	0	0	0	0	0	0	0	0	0	0	0	0	0	0	0	0	0	0	0	0	0
	14.5	0	0	0	0			0	0	0	0	0	0	0	0	0	0	0		0	0	0	0	0	0	0	0	0	0	0	0	0	0	0	0	0	0	0	0	0	0	0	0
	15	0.0075188	0	0	0			0	0	0.00757576	0	0	0	0	0	0	0	0		0	0	0	0	0	0	0	0	0	0	0	0	0.000739098	0	0	0	0	0.00337838	0	0	0	0	0	0
	15.5	0	0	0	0			0	0	0	0	0	0	0	0	0	0	0		0	0	0	0	0	0	0	0	0	0	0	0	0.000739098	0	0	0	0	0.00337838	0	0	0	0	0	0
	16	0	0	0	0			0	0	0	0	0	0	0	0	0	0	0		0	0	0	0	0	0	0	0	0	0	0	0	0	0	0	0	0	0	0	0	0	0	0	0
	16.5	0	0	0	0			0	0	0	0	0	0	0	0	0	0	0		0	0	0	0	0	0	0	0	0	0	0	0	0	0	0	0	0	0	0	0	0	0	0	0
	17	0	0	0	0			0	0	0	0	0	0	0	0	0	0	0		0	0	0	0	0	0	0	0	0	0	0	0	0	0	0	0	0	0	0	0	0	0	0	0
	More	0	0	0	0			0	0	0	0	0	0	0	0	0	0	0		0	0	0	0	0	0	0	0	0	0	0	0	0	0	0	0	0	0	0	0	0	0	0	0

## Sheet: Int6_low faulting
	Full network					Fault					Fracture network					Full network: Branches						Full network: nodes			Fault network: branches						Fault network: nodes			Fracture network: branches						Fracture network: nodes
	ID	Tl (m)	Sets	Orient		ID	Tl (m)	Sets	Orient		ID	Tl (m)	Sets	Orient		ID	Bl (m)	Class	Con.	Set	Orient	OBJECTID *	Class		ID	Bl (m)	Class	Con.	Sets	Orient	ID	Class		ID	Bl (m)	Class	Con.	Sets	Orient	ID	Class
	78	3.82171	0	33.66		78	3.82171	0	33.66		1	3.55321	0	43.19		2688	0.82433	X - Y	C - C	0	30.38	1	E		2	1.33379	U - Y	C - U	0	37.65	1	E		2269	1.36128	X - X	C - C	0	45.11	8	E
	103	3.55321	0	43.19		56	2.2212	2	138.9		4	3.33971	0	43.52		89	0.614223	X - X	C - C	0	30.85	3	E		119	3.07069	I - U	I - U	0	33.28	3	E		2270	0.384267	X - X	C - C	0	44.35	11	E
	106	3.33971	0	43.52		57	2.79799	2	149.16		5	3.19493	0	40.96		2676	0.204497	X - X	C - C	0	30.99	5	E		96	0.143657	Y - Y	C - C	1	98.97	11	E		2274	0.187287	X - X	C - C	0	42.99	17	E
	107	3.19493	0	40.96		58	7.43639	2	136.88		10	7.69565	0	41.09		2203	0.465021	X - X	C - C	0	32.69	8	E		84	0.328222	I - Y	C - I	1	101.53	21	E		2276	0.238846	X - X	C - C	0	43.76	28	E
	112	7.69565	0	41.09		60	7.06272	2	148.47		14	1.57617	0	46.84		115	0.774079	X - X	C - C	0	32.72	11	E		94	0.148072	I - Y	C - I	1	100.27	66	E		2277	0.075125	X - X	C - C	0	43.38	34	E
	116	1.57617	0	46.84		61	2.05567	2	125.19		26	5.86198	0	45.32		796	0.903274	X - X	C - C	0	34.65	13	E		71	2.12304	X - Y	C - C	2	148.33	80	E		2278	0.220324	X - X	C - C	0	43.66	42	E
	128	5.86198	0	45.32		62	0.937523	2	127.86		32	6.05018	0	41.26		312	0.541395	X - X	C - C	0	34.73	15	E		81	0.537974	Y - Y	C - C	2	121.9	93	E		2279	0.07411	X - X	C - C	0	44.34	46	E
	134	6.05018	0	41.26		63	1.22123	2	140.89		40	5.82309	0	45.56		1454	0.631001	X - X	C - C	0	35	17	E		110	2.16162	Y - Y	C - C	2	149.56	102	E		2282	0.102482	X - X	C - C	0	37.23	52	E
	142	5.82309	0	45.56		64	1.18365	2	119.05		42	4.64198	0	38.63		1847	0.32848	X - X	C - C	0	35.08	18	E		42	2.78436	I - Y	C - I	2	149.36	170	E		41	0.4046	X - X	C - C	0	44.78	53	E
	144	4.64198	0	38.63		65	1.37113	2	147.56		46	9.89404	0	48.49		1568	0.724466	X - X	C - C	0	35.33	27	E		63	4.27836	I - Y	C - I	2	147.89	172	E		46	0.447254	X - X	C - C	0	48.97	66	E
	148	9.89404	0	48.49		66	1.03998	2	109.99		47	3.28316	0	42.97		1211	0.164421	X - X	C - C	0	35.59	30	E		65	2.05558	I - Y	C - I	2	125.19	190	E		54	1.16906	X - X	C - C	0	39.19	77	E
	149	3.28316	0	42.97		67	2.466	2	149.91		55	1.57711	0	36.29		1196	0.545503	X - X	C - C	0	35.84	36	E		76	0.259045	I - Y	C - I	2	128.65	194	E		81	0.614223	X - X	C - C	0	30.85	81	E
	157	1.57711	0	36.29		74	0.732087	2	121.49		61	4.72048	0	35.57		1903	0.409299	X - X	C - C	0	36.09	40	E		78	0.921852	I - Y	C - I	2	126.87	196	E		149	0.622633	X - X	C - C	0	43.2	95	E
	163	4.72048	0	35.57		82	4.48569	2	147.82		68	5.93031	0	38.5		2982	0.097409	X - X	C - C	0	36.11	44	E		82	0.194199	I - Y	C - I	2	120.34	200	E		167	1.24741	X - X	C - C	0	49.91	106	E
	170	5.93031	0	38.5		87	1.18086	2	127.28		71	5.06157	0	39.84		2983	0.097409	X - X	C - C	0	36.11	48	E		83	1.22129	I - Y	C - I	2	140.88	201	E		260	0.541395	X - X	C - C	0	34.73	118	E
	173	5.06157	0	39.84		97	1.03591	2	147.29		72	1.25515	0	49.38		405	1.33221	X - X	C - C	0	36.13	53	E		88	0.855413	I - Y	C - I	2	125.83	203	E		287	0.515369	X - X	C - C	0	37.15	125	E
	174	1.25515	0	49.38		1	9.32802	3	6.79		74	4.63622	0	49.81		594	0.747603	X - X	C - C	0	36.25	55	E		95	1.37119	I - Y	C - I	2	147.56	205	E		325	0.266232	X - X	C - C	0	45.38	131	E
	176	4.63622	0	49.81		2	1.55899	3	19.9		75	0.974497	0	44.45		705	1.15303	X - X	C - C	0	36.36	56	E		98	0.74824	I - Y	C - I	2	114.08	2	I		335	1.33221	X - X	C - C	0	36.13	143	E
	177	0.974497	0	44.45		3	0.603276	3	1.8		77	7.13444	0	36.04		856	0.612412	X - X	C - C	0	36.55	69	E		43	3.85219	U - Y	C - U	2	147.16	5	I		345	0.448033	X - X	C - C	0	45.38	150	E
	179	7.13444	0	36.04		4	3.83853	3	24.04		78	4.02372	0	34.88		1387	0.503843	X - X	C - C	0	36.61	74	E		16	1.03597	I - I	I - I	2	147.28	6	I		446	0.6652	X - X	C - C	0	47.56	158	E
	180	4.02372	0	34.88		5	1.79163	3	5.14		86	0.583689	0	46.42		2118	0.512146	X - X	C - C	0	36.66	76	E		31	2.22114	I - I	I - I	2	138.9	7	I		488	0.747603	X - X	C - C	0	36.25	188	E
	188	0.583689	0	46.42		6	2.47019	3	23.9		95	8.85528	0	44.35		1189	0.209101	X - X	C - C	0	36.68	78	E		50	2.79799	I - I	I - I	2	149.16	8	I		517	0.595161	X - X	C - C	0	37.28	195	E
	197	8.85528	0	44.35		7	3.87239	3	165.71		99	4.96091	0	43.51		2727	0.611783	X - X	C - C	0	36.69	89	E		73	0.937491	I - I	I - I	2	127.86	9	I		521	1.09214	X - X	C - C	0	39.14	209	E
	201	4.96091	0	43.51		8	0.856658	3	1.64		104	12.1694	0	36.26		1271	0.836275	X - X	C - C	0	36.78	105	E		77	7.43638	I - I	I - I	2	136.88	10	I		549	0.577164	X - X	C - C	0	42.12	227	E
	206	12.1694	0	36.26		9	0.864911	3	169.74		112	12.0344	0	46.45		726	0.858805	X - X	C - C	0	36.87	117	E		106	0.218547	Y - Y	C - C	3	24.29	12	I		579	0.42475	X - X	C - C	0	39.06	249	E
	214	12.0344	0	46.45		10	1.23414	3	169.71		117	9.94421	0	45.39		1806	1.26927	X - X	C - C	0	37.04	132	E		4	2.638	I - Y	C - I	3	18.16	13	I		587	0.858805	X - X	C - C	0	36.87	266	E
	219	9.94421	0	45.39		11	1.84797	3	164.07		128	10.9686	0	46.94		341	0.515369	X - X	C - C	0	37.15	142	E		5	2.68731	I - Y	C - I	3	5.64	14	I		639	0.724242	X - X	C - C	0	37.36	296	E
	230	10.9686	0	46.94		12	1.50652	3	4.68		129	5.54895	0	34.35		2024	0.82232	X - X	C - C	0	37.17	148	E		24	1.25005	I - Y	C - I	3	161.1	15	I		644	0.903274	X - X	C - C	0	34.65	319	E
	231	5.54895	0	34.35		13	1.54167	3	7.73		137	7.86853	0	35.55		2330	0.184764	X - X	C - C	0	37.24	160	E		26	0.59791	I - Y	C - I	3	170.33	16	I		693	0.612412	X - X	C - C	0	36.55	331	E
	239	7.86853	0	35.55		14	1.64808	3	8.4		165	11.5028	0	43.49		2481	0.912179	X - X	C - C	0	37.24	168	E		28	1.50654	I - Y	C - I	3	4.68	17	I		746	0.799467	X - X	C - C	0	37.7	342	E
	267	11.5028	0	43.49		15	4.1074	3	6.46		170	1.45184	0	34.28		638	0.595161	X - X	C - C	0	37.28	175	E		29	0.402751	I - Y	C - I	3	154.72	18	I		814	1.43655	X - X	C - C	0	37.36	354	E
	272	1.45184	0	34.28		16	1.44919	3	176.11		174	0.140398	0	47.25		789	0.72418	X - X	C - C	0	37.35	200	E		30	0.732473	I - Y	C - I	3	175.62	19	I		859	1.05624	X - X	C - C	0	38.41	392	E
	276	0.140398	0	47.25		17	3.37215	3	20.59		181	0.092575	0	30.94		1002	1.43655	X - X	C - C	0	37.36	207	E		32	1.59872	I - Y	C - I	3	173.91	20	I		880	0.789129	X - X	C - C	0	34.39	435	E
	283	0.092575	0	30.94		18	1.63267	3	1.16		186	3.56382	0	46.26		1502	0.875916	X - X	C - C	0	37.38	223	E		46	0.889497	I - Y	C - I	3	3.01	22	I		887	0.541865	X - X	C - C	0	38	459	E
	288	3.56382	0	46.26		19	1.91869	3	177.82		187	12.2689	0	37.52		1901	1.00326	X - X	C - C	0	37.51	236	E		47	0.440962	I - Y	C - I	3	155.64	23	I		919	1.61114	X - X	C - C	0	45.8	462	E
	289	12.2689	0	37.52		20	4.30978	3	2.82		192	5.17681	0	48.67		2124	0.642985	X - X	C - C	0	37.53	258	E		53	0.27594	I - Y	C - I	3	22.41	24	I		949	1.65241	X - X	C - C	0	39.01	479	E
	294	5.17681	0	48.67		21	2.80376	3	5.69		200	2.97834	0	48.99		1452	0.471821	X - X	C - C	0	37.84	285	E		54	1.7916	I - Y	C - I	3	5.14	25	I		951	0.265749	X - X	C - C	0	49.66	497	E
	302	2.97834	0	48.99		22	4.49407	3	0.58		209	0.645533	0	34.47		2455	0.191067	X - X	C - C	0	37.84	303	E		58	1.08441	I - Y	C - I	3	164.01	26	I		953	0.209101	X - X	C - C	0	36.68	515	E
	311	0.645533	0	34.47		23	3.17618	3	0.57		219	6.64996	0	38.13		2574	1.12001	X - X	C - C	0	37.86	337	E		60	0.37915	I - Y	C - I	3	172.24	27	I		960	0.545503	X - X	C - C	0	35.84	523	E
	321	6.64996	0	38.13		24	1.00803	3	16.45		224	1.78265	0	37.01		1679	0.810969	X - X	C - C	0	38.1	354	E		64	3.20319	I - Y	C - I	3	176.84	28	I		962	1.13775	X - X	C - C	0	39.64	524	E
	326	1.78265	0	37.01		25	4.82935	3	169.16		231	6.4805	0	38.53		2862	0.513844	X - X	C - C	0	38.27	356	E		69	2.19426	I - Y	C - I	3	24.08	29	I		1019	0.828238	X - X	C - C	0	39.6	530	E
	333	6.4805	0	38.53		26	1.13523	3	168.29		257	5.67308	0	47.78		716	0.269607	X - X	C - C	0	38.33	378	E		70	2.02358	I - X	C - I	3	2.75	30	I		1060	1.54463	X - X	C - C	0	48.67	562	E
	359	5.67308	0	47.78		27	1.59872	3	173.91		258	2.63645	0	44.44		1064	1.05624	X - X	C - C	0	38.41	389	E		75	2.143	I - Y	C - I	3	155.97	31	I		1084	0.603944	X - X	C - C	0	43.03	579	E
	360	2.63645	0	44.44		28	1.84036	3	6.94		262	3.04108	0	45.53		2484	0.537718	X - X	C - C	0	38.42	404	E		79	1.64034	I - Y	C - I	3	20.92	32	I		1099	0.503843	X - X	C - C	0	36.61	586	E
	364	3.04108	0	45.53		29	1.74129	3	179.14		283	3.76398	0	47.74		1069	0.466978	X - X	C - C	0	38.45	450	E		85	3.61313	I - Y	C - I	3	157.13	33	I		1121	1.61082	X - X	C - C	0	48.22	596	E
	385	3.76398	0	47.74		30	5.71463	3	4.83		285	12.8843	0	37.7		1773	0.595457	X - X	C - C	0	38.48	483	E		87	1.95161	I - Y	C - I	3	156.75	34	I		1151	0.631001	X - X	C - C	0	35	607	E
	387	12.8843	0	37.7		31	1.77317	3	7.45		290	0.589202	0	48.67		1985	0.157829	X - X	C - C	0	38.57	505	E		89	1.16685	I - Y	C - I	3	161.75	35	I		1179	1.58652	X - X	C - C	0	45.39	608	E
	392	0.589202	0	48.67		32	2.6873	3	5.64		292	1.64734	0	34.02		1185	0.749547	X - X	C - C	0	38.89	532	E		92	1.73181	I - Y	C - I	3	20.27	36	I		1187	0.295485	X - X	C - C	0	42.26	618	E
	394	1.64734	0	34.02		33	3.76038	3	0.31		296	8.27872	0	46.35		2014	0.844631	X - X	C - C	0	39.08	535	E		102	0.400676	I - Y	C - I	3	15.85	37	I		1189	0.873053	X - X	C - C	0	40.27	619	E
	398	8.27872	0	46.35		34	2.25093	3	0.37		300	7.40413	0	45		1101	0.902864	X - X	C - C	0	39.12	558	E		103	0.603373	I - Y	C - I	3	1.81	38	I		1265	0.73819	X - X	C - C	0	47.35	631	E
	402	7.40413	0	45		35	4.37969	3	172.6		301	2.88036	0	30.68		1690	0.780645	X - X	C - C	0	39.13	577	E		105	9.32809	I - Y	C - I	3	6.79	39	I		1337	0.871737	X - X	C - C	0	46.39	632	E
	403	2.88036	0	30.68		36	0.745593	3	176.25		304	3.49068	0	37.16		642	1.09214	X - X	C - C	0	39.14	598	E		112	0.304384	I - Y	C - I	3	152.34	40	I		1404	1.26927	X - X	C - C	0	37.04	652	E
	406	3.49068	0	37.16		37	0.889515	3	3.01		307	2.08934	0	45.99		56	1.16906	X - X	C - C	0	39.19	607	E		56	5.19896	U - Y	C - U	3	171.76	41	I		1431	0.32848	X - X	C - C	0	35.08	676	E
	409	2.08934	0	45.99		38	8.98306	3	165.91		318	11.88	0	43.89		2779	1.09451	X - X	C - C	0	39.25	608	E		114	0.314899	U - Y	C - U	3	20.58	42	I		1471	0.409299	X - X	C - C	0	36.09	678	E
	420	11.88	0	43.89		39	1.83068	3	158.59		323	10.4626	0	38.86		1281	0.828238	X - X	C - C	0	39.6	610	E		118	0.7668	U - Y	C - U	3	1.2	43	I		1495	1.01076	X - X	C - C	0	46.09	707	E
	425	10.4626	0	38.86		40	4.07443	3	152.36		334	0.102753	0	44.17		1203	1.13775	X - X	C - C	0	39.64	615	E		3	1.54311	I - I	I - I	3	2.83	44	I		1501	0.943666	X - X	C - C	0	39.64	738	E
	436	0.102753	0	44.17		41	2.05241	3	2.32		340	9.99361	0	45.58		1939	0.943666	X - X	C - C	0	39.64	650	E		6	1.77316	I - I	I - I	3	7.45	46	I		1621	0.263778	X - X	C - C	0	47.44	746	E
	442	9.99361	0	45.58		42	1.46356	3	166.17		341	2.22552	0	38.61		2369	1.26704	X - X	C - C	0	39.71	667	E		8	1.44046	I - I	I - I	3	8.15	47	I		1626	1.33447	X - X	C - C	0	36.98	783	E
	443	2.22552	0	38.61		43	2.72475	3	178.63		342	5.92739	0	45.83		2463	0.590421	X - X	C - C	0	40.24	673	E		9	1.64808	I - I	I - I	3	8.4	48	I		1631	1.48762	X - X	C - C	0	38.41	793	E
	444	5.92739	0	45.83		44	1.22094	3	178.91		349	5.86445	0	46.99		1514	0.873053	X - X	C - C	0	40.27	680	E		10	1.11242	I - I	I - I	3	8.73	49	I		1716	0.783237	X - X	C - C	0	46.46	797	E
	451	5.86445	0	46.99		45	1.60757	3	163.6		350	13.2553	0	37.46		684	0.155204	X - X	C - C	0	40.37	693	E		11	5.71463	I - I	I - I	3	4.83	50	I		1736	1.24039	X - X	C - C	0	47.34	839	E
	452	13.2553	0	37.46		46	2.95493	3	0.55		360	0.180598	0	43.36		2366	0.414121	X - X	C - C	0	40.69	708	E		13	0.899746	I - I	I - I	3	168.37	51	I		1757	1.21282	X - X	C - C	0	43.02	885	E
	462	0.180598	0	43.36		47	1.03999	3	11.48		363	5.71452	0	39.8		349	0.388527	X - X	C - C	0	41.12	709	E		14	1.74128	I - I	I - I	3	179.14	52	I		1786	0.184764	X - X	C - C	0	37.24	908	E
	465	5.71452	0	39.8		48	0.749452	3	27.01		365	10.8503	0	42.74		981	1.05882	X - X	C - C	0	41.19	718	E		15	1.36337	I - I	I - I	3	1.34	53	I		1812	0.414121	X - X	C - C	0	40.69	925	E
	467	10.8503	0	42.74		49	0.511533	3	6.73		367	2.64119	0	46.9		669	0.483002	X - X	C - C	0	41.51	720	E		17	3.76037	I - I	I - I	3	0.32	55	I		1814	1.26704	X - X	C - C	0	39.71	981	E
	469	2.64119	0	46.9		50	0.943956	3	177.39		372	4.51485	0	47.96		675	0.577164	X - X	C - C	0	42.12	721	E		18	0.384419	I - I	I - I	3	11.56	56	I		1823	1.01502	X - X	C - C	0	43.34	1000	E
	474	4.51485	0	47.96		51	0.217397	3	4.91		391	5.26616	0	44.51		1511	0.295485	X - X	C - C	0	42.26	736	E		19	0.457752	I - I	I - I	3	1.5	57	I		1827	0.860891	X - X	C - C	0	47.48	1035	E
	493	5.26616	0	44.51		52	0.374764	3	0.34		392	7.36549	0	46.44		2296	1.21282	X - X	C - C	0	43.02	737	E		20	1.45403	I - I	I - I	3	171.9	58	I		1877	0.191067	X - X	C - C	0	37.84	1058	E
	494	7.36549	0	46.44		53	1.36339	3	1.34		412	5.75833	0	37.04		2813	1.11746	X - X	C - C	0	43.03	759	E		21	4.82937	I - I	I - I	3	169.16	59	I		1882	0.590421	X - X	C - C	0	40.24	1200	E
	514	5.75833	0	37.04		54	4.18889	3	25.16		417	3.64588	0	49.25		174	0.622633	X - X	C - C	0	43.2	778	E		22	0.635387	I - I	I - I	3	177.1	60	I		1897	0.912179	X - X	C - C	0	37.24	1203	E
	519	3.64588	0	49.25		55	1.11244	3	8.73		418	2.47182	0	36.09		2583	0.616907	X - X	C - C	0	43.29	794	E		23	0.482716	I - I	I - I	3	169.72	61	I		1899	0.537718	X - X	C - C	0	38.42	1265	E
	520	2.47182	0	36.09		59	1.1539	3	150.77		419	3.41321	0	33.32		2378	1.01502	X - X	C - C	0	43.34	796	E		25	1.00799	I - I	I - I	3	16.44	62	I		1972	1.12001	X - X	C - C	0	37.86	1272	E
	521	3.41321	0	33.32		68	0.877489	3	4.68		421	8.32362	0	42.29		1207	0.347801	X - X	C - C	0	43.84	852	E		27	1.23418	I - I	I - I	3	169.71	63	I		1978	0.616907	X - X	C - C	0	43.29	1289	E
	523	8.32362	0	42.29		69	1.80077	3	4.32		422	6.93049	0	43.93		1699	0.352312	X - X	C - C	0	44.24	871	E		33	1.84037	I - I	I - I	3	6.94	64	I		2040	0.767809	X - X	C - C	0	45.07	1314	E
	524	6.93049	0	43.93		70	3.25387	3	155.22		425	2.71069	0	40.08		1415	0.879921	X - X	C - C	0	44.43	883	E		34	4.10742	I - I	I - I	3	6.46	65	I		2045	0.204497	X - X	C - C	0	30.99	1321	E
	527	2.71069	0	40.08		71	0.89477	3	23.33		428	4.85075	0	44.47		363	1.36832	X - X	C - C	0	44.49	927	E		35	0.864945	I - I	I - I	3	169.73	67	I		2047	0.956989	X - X	C - C	0	40.07	1322	E
	530	4.85075	0	44.47		72	1.44034	3	8.15		430	10.6062	0	36.93		1225	0.411298	X - X	C - C	0	44.67	944	E		37	0.217397	I - I	I - I	3	4.91	68	I		2066	3.45167	X - X	C - C	0	42.42	1343	E
	532	10.6062	0	36.93		73	0.996153	3	4.12		436	3.96062	0	41.58		43	0.4046	X - X	C - C	0	44.78	994	E		38	0.745584	I - I	I - I	3	176.24	69	I		2108	0.74426	X - X	C - C	0	45.32	1345	E
	538	3.96062	0	41.58		75	1.16682	3	161.75		437	2.04016	0	35.02		1653	0.904394	X - X	C - C	0	44.96	1031	E		39	0.856655	I - I	I - I	3	1.64	70	I		2119	1.09451	X - X	C - C	0	39.25	1371	E
	539	2.04016	0	35.02		76	1.65498	3	3.74		442	3.09535	0	40.09		2667	0.767809	X - X	C - C	0	45.07	1060	E		40	1.19987	I - I	I - I	3	164.51	71	I		2174	1.56426	X - X	C - C	0	47.79	1395	E
	544	3.09535	0	40.09		77	3.16755	3	27.36		450	9.23476	0	45.72		2765	0.74426	X - X	C - C	0	45.32	1086	E		41	0.996153	I - I	I - I	3	4.12	72	I		22	0.422746	X - Y	C - C	0	30.83	1396	E
	552	9.23476	0	45.72		79	7.72552	3	177.46		451	9.01738	0	44.68		391	0.266232	X - X	C - C	0	45.38	1110	E		44	3.17618	I - I	I - I	3	0.57	73	I		24	0.539664	X - Y	C - C	0	45	1407	E
	553	9.01738	0	44.68		80	3.20318	3	176.84		452	8.31593	0	36.8		418	0.448033	X - X	C - C	0	45.38	1172	E		45	4.49408	I - I	I - I	3	0.58	74	I		26	0.788837	X - Y	C - C	0	45.7	1420	E
	554	8.31593	0	36.8		81	1.41019	3	174.61		457	14.7116	0	37.63		290	0.599788	X - X	C - C	0	45.47	1198	E		48	1.66787	I - I	I - I	3	4.31	75	I		32	0.909102	X - Y	C - C	0	38.34	1437	E
	559	14.7116	0	37.63		83	0.653658	3	2.64		470	6.39864	0	48.77		2449	0.867386	X - X	C - C	0	45.61	1240	E		49	0.943931	I - I	I - I	3	177.39	76	I		36	0.464053	X - Y	C - C	0	42.47	1438	E
	572	6.39864	0	48.77		84	1.14482	3	171.04		473	3.86586	0	38.49		2647	1.95404	X - X	C - C	0	45.77	1241	E		52	0.374764	I - I	I - I	3	0.34	78	I		43	0.547416	X - Y	C - C	0	37.94	1458	E
	575	3.86586	0	38.49		85	1.45406	3	171.9		476	2.7057	0	36.87		1145	1.61114	X - X	C - C	0	45.8	1267	E		55	1.41019	I - I	I - I	3	174.61	81	I		52	0.518462	X - Y	C - C	0	35.89	1459	E
	578	2.7057	0	36.87		86	0.635401	3	177.1		477	7.21939	0	33.06		1537	0.783167	X - X	C - C	0	45.92	1421	E		57	1.4492	I - I	I - I	3	176.11	82	I		56	0.561701	X - Y	C - C	0	37.8	1474	E
	579	7.21939	0	33.06		88	2.14287	3	155.97		481	5.22808	0	47.12		1931	1.01076	X - X	C - C	0	46.09	1441	E		59	1.15395	I - I	I - I	3	150.77	83	I		59	0.180175	X - Y	C - C	0	35.22	1478	E
	583	5.22808	0	47.12		89	1.23658	3	2.41		482	3.26567	0	44.01		2010	1.07715	X - X	C - C	0	46.28	1444	E		61	2.95495	I - I	I - I	3	0.55	84	I		62	1.33988	X - Y	C - C	0	34.75	1481	E
	584	3.26567	0	44.01		90	2.64654	3	152.73		485	10.3137	0	33.41		1717	0.871737	X - X	C - C	0	46.39	1520	E		62	2.80374	I - I	I - I	3	5.69	85	I		64	1.3869	X - Y	C - C	0	36.29	1507	E
	587	10.3137	0	33.41		91	1.66786	3	4.31		486	6.61956	0	49.33		2242	0.783237	X - X	C - C	0	46.46	1529	E		66	0.749472	I - I	I - I	3	27.01	86	I		68	0.394459	X - Y	C - C	0	37.15	1514	E
	588	6.61956	0	49.33		92	1.54314	3	2.83		508	0.962978	0	49.87		1498	0.706602	X - X	C - C	0	46.58	1547	E		67	1.03997	I - I	I - I	3	11.48	87	I		70	1.32981	X - Y	C - C	0	32.24	1521	E
	610	0.962978	0	49.87		93	0.899687	3	168.38		510	0.873543	0	48.69		2733	1.16003	X - X	C - C	0	46.98	1577	E		68	1.72795	I - I	I - I	3	3.31	88	I		74	1.19378	X - Y	C - C	0	44.97	1525	E
	612	0.873543	0	48.69		94	0.384419	3	11.56		516	7.47121	0	38.07		501	1.76048	X - X	C - C	0	47.1	1586	E		72	0.511533	I - I	I - I	3	6.73	89	I		79	1.08163	X - Y	C - C	0	42.38	1537	E
	618	7.47121	0	38.07		95	0.457752	3	1.5		518	3.5321	0	39.27		2335	0.571706	X - X	C - C	0	47.23	1587	E		74	1.91869	I - I	I - I	3	177.82	90	I		87	0.331081	X - Y	C - C	0	44.9	1543	E
	620	3.5321	0	39.27		96	0.482716	3	169.72		519	6.09203	0	45.72		1231	1.12085	X - X	C - C	0	47.34	1613	E		80	0.653671	I - I	I - I	3	2.64	91	I		90	0.667746	X - Y	C - C	0	39.14	1546	E
	621	6.09203	0	45.72		98	1.19987	3	164.51		520	1.03233	0	38.44		2268	1.24039	X - X	C - C	0	47.34	1615	E		86	2.72476	I - I	I - I	3	178.63	92	I		91	1.06663	X - Y	C - C	0	37.33	1556	E
	622	1.03233	0	38.44		99	1.72795	3	3.31		526	1.62805	0	30.11		1621	0.73819	X - X	C - C	0	47.35	1646	E		90	1.14482	I - I	I - I	3	171.04	94	I		94	0.352914	X - Y	C - C	0	34.97	1558	E
	628	1.62805	0	30.11		100	1.65394	3	162.62		532	3.23506	0	49.74		2823	0.511089	X - X	C - C	0	47.5	1666	E		91	3.25389	I - I	I - I	3	155.22	95	I		98	0.569725	X - Y	C - C	0	44.77	1567	E
	634	3.23506	0	49.74		101	0.685201	3	153.95		534	10.4339	0	40.15		1327	0.816165	X - X	C - C	0	47.54	1671	E		93	1.83068	I - I	I - I	3	158.59	96	I		105	0.589564	X - Y	C - C	0	43.3	1577	E
	636	10.4339	0	40.15		102	1.78131	3	154.35		535	7.38521	0	47.2		542	0.6652	X - X	C - C	0	47.56	1672	E		97	1.63268	I - I	I - I	3	1.16	97	I		107	0.481104	X - Y	C - C	0	40.32	1582	E
	637	7.38521	0	47.2							536	9.43485	0	41.47		2871	1.56426	X - X	C - C	0	47.79	1683	E		101	1.60756	I - I	I - I	3	163.61	99	I		110	1.16288	X - Y	C - C	0	33.86	1585	E
	638	9.43485	0	41.47							538	4.28541	0	46.81		2751	0.260035	X - X	C - C	0	47.82	1698	E		104	4.30979	I - I	I - I	3	2.82	100	I		114	0.720004	X - Y	C - C	0	37.48	1588	E
	640	4.28541	0	46.81							548	10.016	0	40.67		2384	0.289185	X - X	C - C	0	47.97	1719	E		107	1.65498	I - I	I - I	3	3.74	101	I		117	0.821076	X - Y	C - C	0	40.04	1594	E
	650	10.016	0	40.67							552	3.30454	0	47.01		373	0.327134	X - X	C - C	0	48.23	1720	E		108	2.64655	I - I	I - I	3	152.73	104	I		122	0.671857	X - Y	C - C	0	37.87	1595	E
	654	3.30454	0	47.01							553	8.40343	0	35.59		2784	0.474891	X - X	C - C	0	48.53	1747	E		109	1.65394	I - I	I - I	3	162.62	105	I		124	1.22913	X - Y	C - C	0	44.56	1597	E
	655	8.40343	0	35.59							554	3.64362	0	48.18		1534	0.399703	X - X	C - C	0	48.83	1748	E		113	0.685248	I - I	I - I	3	153.95	107	I		127	1.07904	X - Y	C - C	0	47.15	1598	E
	656	3.64362	0	48.18							566	3.37448	0	47.11		1411	0.794651	X - X	C - C	0	48.92	1766	E		116	1.80079	I - I	I - I	3	4.32	108	I		132	0.835772	X - Y	C - C	0	44.45	1604	E
	668	3.37448	0	47.11							567	2.37789	0	47.18		48	0.447254	X - X	C - C	0	48.97	1773	E		1	0.807451	I - U	I - U	3	22.26	109	I		139	0.520322	X - Y	C - C	0	49.98	1608	E
	669	2.37789	0	47.18							575	10.7773	0	40.52		2576	0.708906	X - X	C - C	0	49	1776	E		7	1.97105	I - U	I - U	3	1.1	110	I		145	1.18172	X - Y	C - C	0	39.85	1615	E
	677	10.7773	0	40.52							583	6.01634	0	37.97		1187	0.265749	X - X	C - C	0	49.66	1802	E		12	0.654831	I - U	I - U	3	6.45	111	I		155	1.02199	X - Y	C - C	0	32.78	1616	E
	685	6.01634	0	37.97							587	1.77937	0	43.32		2252	0.424925	X - X	C - C	0	49.83	1811	E		36	4.10072	I - U	I - U	3	173.74	112	I		160	0.671698	X - Y	C - C	0	45.22	1617	E
	689	1.77937	0	43.32							592	2.63597	0	49.28		22	0.422746	X - Y	C - C	0	30.83	1819	E		51	3.35559	I - U	I - U	3	162.42	113	I		166	0.68089	X - Y	C - C	0	44.82	1623	E
	694	2.63597	0	49.28							594	3.96491	0	44.54		306	0.833089	X - Y	C - C	0	30.99	1829	E		99	7.44922	I - U	I - U	3	177.36	114	I		174	1.11738	X - Y	C - C	0	38.53	1628	E
	696	3.96491	0	44.54							599	3.43139	0	42.44		336	0.378429	X - Y	C - C	0	31.05	1832	E		100	3.29033	I - U	I - U	3	21.77	115	I		179	0.557248	X - Y	C - C	0	44.42	1629	E
	701	3.43139	0	42.44							607	2.59875	0	41.58		296	0.627102	X - Y	C - C	0	31.09	1835	E		111	1.01314	I - U	I - U	3	179.64	116	I		190	0.622584	X - Y	C - C	0	37.1	1632	E
	709	2.59875	0	41.58							611	2.94694	0	38.65		800	0.419698	X - Y	C - C	0	31.28	1849	E		115	0.675823	I - U	I - U	3	4.91	117	I		191	0.754658	X - Y	C - C	0	38.43	1633	E
	713	2.94694	0	38.65							612	2.83716	0	48.19		1469	0.912135	X - Y	C - C	0	31.48	1857	E		117	3.14569	I - U	I - U	3	27.57	118	I		198	0.566719	X - Y	C - C	0	35.91	1634	E
	714	2.83716	0	48.19							614	3.59659	0	36.33		1319	0.087302	X - Y	C - C	0	31.8	1859	E		120	1.30457	I - U	I - U	3	152.84	119	I		200	0.46153	X - Y	C - C	0	42.75	1635	E
	716	3.59659	0	36.33							615	3.75278	0	46.37		1596	0.645223	X - Y	C - C	0	31.86	1871	E								120	I		208	1.51469	X - Y	C - C	0	45.55	1636	E
	717	3.75278	0	46.37							620	4.18762	0	40		530	1.27476	X - Y	C - C	0	32.08	1873	E								121	I		215	0.777397	X - Y	C - C	0	39.03	1637	E
	722	4.18762	0	40							622	2.39463	0	42.58		75	1.32981	X - Y	C - C	0	32.24	1890	E								122	I		217	0.674366	X - Y	C - C	0	46.85	1638	E
	724	2.39463	0	42.58							624	0.843103	0	35.19		1995	0.243801	X - Y	C - C	0	32.5	1903	E								123	I		226	0.682869	X - Y	C - C	0	33.02	1648	E
	726	0.843103	0	35.19							626	4.81721	0	42.67		1355	0.538354	X - Y	C - C	0	32.51	1907	E								124	I		228	0.442567	X - Y	C - C	0	42.75	1	I
	728	4.81721	0	42.67							631	0.394146	0	47.67		180	1.02199	X - Y	C - C	0	32.78	1908	E								125	I		230	0.460723	X - Y	C - C	0	38.07	3	I
	733	0.394146	0	47.67							633	0.456743	0	36.44		267	0.682869	X - Y	C - C	0	33.02	1909	E								127	I		234	0.770596	X - Y	C - C	0	48.63	5	I
	735	0.456743	0	36.44							638	0.505204	0	39.27		351	0.711024	X - Y	C - C	0	33.4	1913	E								128	I		241	0.747367	X - Y	C - C	0	45.47	13	I
	740	0.505204	0	39.27							647	1.05767	0	49.58		575	0.733374	X - Y	C - C	0	33.54	1921	E								129	I		243	0.514871	X - Y	C - C	0	47.46	15	I
	749	1.05767	0	49.58							650	1.25104	0	41.48		1338	0.133487	X - Y	C - C	0	33.63	1928	E								130	I		244	1.00967	X - Y	C - C	0	38.37	18	I
	752	1.25104	0	41.48							669	1.30683	0	35.29		1391	0.26554	X - Y	C - C	0	33.8	1929	E								131	I		248	0.627102	X - Y	C - C	0	31.09	38	I
	771	1.30683	0	35.29							674	0.924611	0	35.53		1467	0.689966	X - Y	C - C	0	33.84	1931	E								132	I		253	0.82072	X - Y	C - C	0	44.09	51	I
	776	0.924611	0	35.53							59	0.148452	1	80.46		2833	0.551169	X - Y	C - C	0	33.84	1932	E								134	I		255	0.833089	X - Y	C - C	0	30.99	68	I
	161	0.148452	1	80.46							64	2.86238	1	51.01		124	1.16288	X - Y	C - C	0	33.86	1937	E								135	I		271	0.791604	X - Y	C - C	0	42.94	70	I
	166	2.86238	1	51.01							79	1.19078	1	62.65		662	0.477448	X - Y	C - C	0	34.06	1940	E								136	I		273	0.554819	X - Y	C - C	0	45.53	71	I
	181	1.19078	1	62.65							92	1.09457	1	94.53		1090	0.720403	X - Y	C - C	0	34.3	1943	E								137	I		275	0.55969	X - Y	C - C	0	47.13	76	I
	194	1.09457	1	94.53							100	0.352302	1	104.94		1953	0.537766	X - Y	C - C	0	34.31	1948	E								138	I		277	0.16836	X - Y	C - C	0	37.76	86	I
	202	0.352302	1	104.94							139	1.87185	1	83.47		195	0.600521	X - Y	C - C	0	34.35	1949	E								139	I		282	0.676094	X - Y	C - C	0	37.98	98	I
	241	1.87185	1	83.47							152	0.342789	1	100.27		1103	0.33029	X - Y	C - C	0	34.35	1950	E								141	I		286	0.577263	X - Y	C - C	0	43.95	103	I
	254	0.342789	1	100.27							167	2.31633	1	65.28		1067	0.435844	X - Y	C - C	0	34.61	1951	E								142	I		291	1.10265	X - Y	C - C	0	38.95	112	I
	269	2.31633	1	65.28							177	0.154293	1	94.09		1233	0.368987	X - Y	C - C	0	34.69	1953	E								144	I		298	0.613046	X - Y	C - C	0	44.5	127	I
	279	0.154293	1	94.09							183	0.375098	1	101.41		1333	0.439335	X - Y	C - C	0	34.7	1958	E								145	I		300	0.254676	X - Y	C - C	0	37.52	141	I
	285	0.375098	1	101.41							191	0.570099	1	86.77		65	1.33988	X - Y	C - C	0	34.75	1963	E								147	I		302	1.36832	X - Y	C - C	0	44.49	152	I
	293	0.570099	1	86.77							215	0.183103	1	90.34		1972	0.227216	X - Y	C - C	0	34.75	1964	E								148	I		307	0.536101	X - Y	C - C	0	38.85	154	I
	317	0.183103	1	90.34							220	3.53681	1	50.67		479	0.216577	X - Y	C - C	0	34.86	1965	E								149	I		310	0.499661	X - Y	C - C	0	48.24	182	I
	322	3.53681	1	50.67							221	2.69894	1	50.09		1698	0.622807	X - Y	C - C	0	34.86	1968	E								150	I		313	1.24412	X - Y	C - C	0	32.7	191	I
	323	2.69894	1	50.09							223	0.431562	1	50.31		762	0.800562	X - Y	C - C	0	34.93	1969	E								151	I		317	0.824833	X - Y	C - C	0	43.53	204	I
	325	0.431562	1	50.31							237	1.08149	1	89.15		1303	1.6763	X - Y	C - C	0	34.94	1970	E								153	I		319	1.2733	X - Y	C - C	0	46.04	207	I
	339	1.08149	1	89.15							245	1.02726	1	101.12		1509	0.365664	X - Y	C - C	0	34.95	1971	E								154	I		330	0.448135	X - Y	C - C	0	37.34	211	I
	347	1.02726	1	101.12							253	2.06222	1	69.94		104	0.352914	X - Y	C - C	0	34.97	1972	E								155	I		339	0.426861	X - Y	C - C	0	44.11	242	I
	355	2.06222	1	69.94							260	0.357235	1	99.31		566	0.3694	X - Y	C - C	0	35.08	1973	E								156	I		342	1.44271	X - Y	C - C	0	34.38	244	I
	362	0.357235	1	99.31							272	3.95824	1	64.79		1488	0.17004	X - Y	C - C	0	35.11	1974	E								157	I		365	0.641967	X - Y	C - C	0	36.39	252	I
	374	3.95824	1	64.79							276	0.772946	1	103.74		2543	0.679467	X - Y	C - C	0	35.11	1975	E								158	I		367	0.438342	X - Y	C - C	0	46	255	I
	378	0.772946	1	103.74							280	0.761241	1	90.09		1572	0.463636	X - Y	C - C	0	35.17	573	I								159	I		368	1.3257	X - Y	C - C	0	45.31	268	I
	382	0.761241	1	90.09							287	4.35854	1	50.41		61	0.180175	X - Y	C - C	0	35.22	645	I								160	I		373	0.434071	X - Y	C - C	0	44.14	276	I
	389	4.35854	1	50.41							289	0.138695	1	76.75		1623	0.832919	X - Y	C - C	0	35.24	676	I								161	I		380	0.207631	X - Y	C - C	0	35.37	280	I
	391	0.138695	1	76.75							308	1.71738	1	83.97		1000	0.329949	X - Y	C - C	0	35.27	707	I								162	I		385	0.800263	X - Y	C - C	0	36.4	289	I
	410	1.71738	1	83.97							327	0.615905	1	61.62		1006	0.068726	X - Y	C - C	0	35.29	715	I								164	I		386	0.225176	X - Y	C - C	0	45.04	292	I
	429	0.615905	1	61.62							329	3.17013	1	66.86		1266	0.27886	X - Y	C - C	0	35.29	769	I								166	I		394	0.216577	X - Y	C - C	0	34.86	297	I
	431	3.17013	1	66.86							352	0.493251	1	81.46		1210	0.930218	X - Y	C - C	0	35.3	772	I								167	I		402	1.27989	X - Y	C - C	0	43.18	304	I
	454	0.493251	1	81.46							354	0.717231	1	99.08		462	0.207631	X - Y	C - C	0	35.37	776	I								168	I		413	3.54926	X - Y	C - C	0	46.52	306	I
	456	0.717231	1	99.08							362	2.70971	1	59.67		2691	0.339688	X - Y	C - C	0	35.43	792	I								169	I		422	0.187053	X - Y	C - C	0	47.36	326	I
	464	2.70971	1	59.67							366	0.675097	1	100.91		1154	1.38	X - Y	C - C	0	35.44	808	I								171	I		436	1.27476	X - Y	C - C	0	32.08	341	I
	468	0.675097	1	100.91							371	0.522524	1	86.7		191	0.195319	X - Y	C - C	0	35.46	858	I								173	I		440	0.262309	X - Y	C - C	0	38.67	345	I
	473	0.522524	1	86.7							378	0.264567	1	87.96		1729	0.643442	X - Y	C - C	0	35.51	1103	I								174	I		453	0.757403	X - Y	C - C	0	37.31	356	I
	480	0.264567	1	87.96							380	0.871244	1	91.63		2440	0.44524	X - Y	C - C	0	35.54	1142	I								175	I		462	0.912904	X - Y	C - C	0	39.7	370	I
	482	0.871244	1	91.63							385	7.19869	1	51.31		445	1.13094	X - Y	C - C	0	35.56	1191	I								177	I		472	0.733374	X - Y	C - C	0	33.54	389	I
	487	7.19869	1	51.31							389	0.584964	1	99.04		2128	1.30035	X - Y	C - C	0	35.71	1274	I								178	I		475	1.12417	X - Y	C - C	0	47.85	397	I
	491	0.584964	1	99.04							397	1.46556	1	84.22		2193	0.727351	X - Y	C - C	0	35.87	1408	I								179	I		482	0.72405	X - Y	C - C	0	45.93	420	I
	499	1.46556	1	84.22							407	0.872263	1	60.8		54	0.518462	X - Y	C - C	0	35.89	1428	I								180	I		486	0.44953	X - Y	C - C	0	44.35	430	I
	509	0.872263	1	60.8							413	4.11002	1	50.25		234	0.566719	X - Y	C - C	0	35.91	1669	I								182	I		490	1.74792	X - Y	C - C	0	49.3	438	I
	515	4.11002	1	50.25							420	1.96223	1	54.06		977	1.8158	X - Y	C - C	0	35.94	1705	I								183	I		492	0.137731	X - Y	C - C	0	47.47	457	I
	522	1.96223	1	54.06							435	1.22968	1	99.16		805	0.119671	X - Y	C - C	0	36.09	1739	I								184	I		507	0.880371	X - Y	C - C	0	48.9	478	I
	537	1.22968	1	99.16							448	0.582188	1	96.06		2947	0.232262	X - Y	C - C	0	36.09	1808	I								185	I		511	0.966774	X - Y	C - C	0	41.54	493	I
	550	0.582188	1	96.06							453	1.01794	1	101.83		1372	0.13267	X - Y	C - C	0	36.17	1985	I								186	I		540	1.4777	X - Y	C - C	0	35.84	510	I
	555	1.01794	1	101.83							459	1.54718	1	54.27		2502	0.247416	X - Y	C - C	0	36.22	14	X								187	I		545	0.763962	X - Y	C - C	0	41.51	526	I
	561	1.54718	1	54.27							462	0.482044	1	95.85		2614	0.777165	X - Y	C - C	0	36.26	16	X								189	I		552	0.887307	X - Y	C - C	0	49.02	552	I
	564	0.482044	1	95.85							488	0.164133	1	104.65		68	1.3869	X - Y	C - C	0	36.29	28	X								191	I		562	0.145761	X - Y	C - C	0	42.25	557	I
	590	0.164133	1	104.65							497	0.586107	1	75.26		2764	0.984513	X - Y	C - C	0	36.29	31	X								192	I		563	0.698901	X - Y	C - C	0	40.6	573	I
	599	0.586107	1	75.26							502	0.35289	1	50.81		2669	1.21782	X - Y	C - C	0	36.36	33	X								193	I		571	0.391066	X - Y	C - C	0	37.34	582	I
	604	0.35289	1	50.81							506	0.428501	1	90.44		441	0.641967	X - Y	C - C	0	36.39	35	X								195	I		583	0.263694	X - Y	C - C	0	47.72	583	I
	608	0.428501	1	90.44							511	0.536903	1	52.14		2077	0.4864	X - Y	C - C	0	36.39	38	X								197	I		591	0.334128	X - Y	C - C	0	37.61	606	I
	613	0.536903	1	52.14							512	0.101956	1	100.34		468	0.800263	X - Y	C - C	0	36.4	39	X								198	I		596	0.198923	X - Y	C - C	0	47.73	612	I
	614	0.101956	1	100.34							533	2.0886	1	69.11		2880	1.0273	X - Y	C - C	0	36.42	41	X								199	I		607	0.308114	X - Y	C - C	0	38.95	614	I
	635	2.0886	1	69.11							537	2.48171	1	80.64		1686	1.40707	X - Y	C - C	0	36.43	43	X								202	I		614	0.800562	X - Y	C - C	0	34.93	615	I
	639	2.48171	1	80.64							545	1.03072	1	91.42		1123	0.796112	X - Y	C - C	0	36.57	49	X								204	I		635	0.858071	X - Y	C - C	0	47.59	625	I
	647	1.03072	1	91.42							555	5.2301	1	51.52		1171	0.256484	X - Y	C - C	0	36.57	58	X								4	Y		641	1.76681	X - Y	C - C	0	43.76	630	I
	657	5.2301	1	51.52							560	0.60557	1	103.1		2663	0.575226	X - Y	C - C	0	36.62	63	X								45	Y		648	0.419698	X - Y	C - C	0	31.28	635	I
	662	0.60557	1	103.1							561	1.45617	1	104.46		1215	0.262341	X - Y	C - C	0	36.68	64	X								54	Y		655	0.360957	X - Y	C - C	0	46.86	647	I
	663	1.45617	1	104.46							563	0.637299	1	104.44		1922	0.53316	X - Y	C - C	0	36.68	67	X								77	Y		672	0.76459	X - Y	C - C	0	42.75	649	I
	665	0.637299	1	104.44							574	9.80327	1	51		1839	1.01949	X - Y	C - C	0	36.72	68	X								79	Y		699	0.802303	X - Y	C - C	0	37.97	658	I
	676	9.80327	1	51							577	3.4406	1	53.55		2272	0.253801	X - Y	C - C	0	36.73	71	X								98	Y		705	0.220756	X - Y	C - C	0	39.02	660	I
	679	3.4406	1	53.55							578	2.8968	1	51.19		210	0.43349	X - Y	C - C	0	36.74	73	X								103	Y		710	0.553966	X - Y	C - C	0	45.47	661	I
	680	2.8968	1	51.19							580	1.52704	1	53.85		360	0.652856	X - Y	C - C	0	36.82	80	X								106	Y		713	0.123479	X - Y	C - C	0	39.78	665	I
	682	1.52704	1	53.85							593	2.0218	1	51.57		1322	0.773581	X - Y	C - C	0	36.93	83	X								133	Y		720	0.072635	X - Y	C - C	0	39.81	667	I
	695	2.0218	1	51.57							602	2.25492	1	52.93		973	0.198981	X - Y	C - C	0	37.05	93	X								140	Y		723	0.134566	X - Y	C - C	0	45.39	683	I
	704	2.25492	1	52.93							604	1.60935	1	58.14		1007	0.280582	X - Y	C - C	0	37.06	95	X								143	Y		733	1.60403	X - Y	C - C	0	48.11	689	I
	706	1.60935	1	58.14							621	2.16608	1	51.4		225	0.622584	X - Y	C - C	0	37.1	96	X								146	Y		760	0.475701	X - Y	C - C	0	48.03	714	I
	723	2.16608	1	51.4							627	0.653324	1	51.5		2232	0.379657	X - Y	C - C	0	37.1	101	X								163	Y		767	0.243506	X - Y	C - C	0	38.56	726	I
	729	0.653324	1	51.5							639	0.980017	1	102.46		217	1.87393	X - Y	C - C	0	37.12	103	X								165	Y		783	0.280887	X - Y	C - C	0	39.8	727	I
	741	0.980017	1	102.46							654	0.657725	1	65.97		73	0.394459	X - Y	C - C	0	37.15	110	X								176	Y		787	0.91428	X - Y	C - C	0	43.98	742	I
	756	0.657725	1	65.97							666	0.734777	1	91.24		1896	1.46387	X - Y	C - C	0	37.16	113	X								181	Y		812	0.329949	X - Y	C - C	0	35.27	748	I
	768	0.734777	1	91.24							671	1.14578	1	50.38		2505	0.191824	X - Y	C - C	0	37.25	116	X								188	Y		819	0.713088	X - Y	C - C	0	46.51	804	I
	773	1.14578	1	50.38							673	1.46528	1	101.23		2791	0.323262	X - Y	C - C	0	37.27	121	X								206	Y		828	0.634174	X - Y	C - C	0	42.06	815	I
	775	1.46528	1	101.23							3	0.933084	2	121.41		872	0.212645	X - Y	C - C	0	37.28	123	X											830	0.367655	X - Y	C - C	0	40.44	818	I
	56	2.2212	2	138.9							6	0.183382	2	137.93		549	0.757403	X - Y	C - C	0	37.31	124	X											843	1.22097	X - Y	C - C	0	39.4	819	I
	57	2.79799	2	149.16							7	0.358542	2	134.19		100	1.06663	X - Y	C - C	0	37.33	130	X											857	0.463572	X - Y	C - C	0	46.76	824	I
	58	7.43639	2	136.88							8	0.286274	2	143.69		1540	0.30709	X - Y	C - C	0	37.33	133	X											863	0.668553	X - Y	C - C	0	38.29	832	I
	60	7.06272	2	148.47							9	0.395816	2	144.65		397	0.448135	X - Y	C - C	0	37.34	140	X											865	0.167729	X - Y	C - C	0	39.99	859	I
	61	2.05567	2	125.19							11	0.478613	2	124.81		703	0.391066	X - Y	C - C	0	37.34	141	X											867	0.720691	X - Y	C - C	0	38.99	860	I
	62	0.937523	2	127.86							12	0.360438	2	111.29		1389	0.234971	X - Y	C - C	0	37.43	143	X											878	1.38435	X - Y	C - C	0	44.27	863	I
	63	1.22123	2	140.89							13	0.161822	2	143.39		128	0.720004	X - Y	C - C	0	37.48	144	X											889	0.33029	X - Y	C - C	0	34.35	864	I
	64	1.18365	2	119.05							18	0.413218	2	143.26		2514	1.07269	X - Y	C - C	0	37.5	147	X											891	0.792452	X - Y	C - C	0	44.65	871	I
	65	1.37113	2	147.56							19	0.324719	2	136.05		356	0.254676	X - Y	C - C	0	37.52	152	X											893	0.28073	X - Y	C - C	0	41.11	888	I
	66	1.03998	2	109.99							20	0.702749	2	136.05		1977	0.969566	X - Y	C - C	0	37.56	159	X											897	1.57391	X - Y	C - C	0	49.88	902	I
	67	2.466	2	149.91							22	1.67749	2	127.87		2671	0.209584	X - Y	C - C	0	37.6	164	X											904	0.796112	X - Y	C - C	0	36.57	903	I
	74	0.732087	2	121.49							24	0.886603	2	140.75		694	0.277083	X - Y	C - C	0	37.61	173	X											906	0.470158	X - Y	C - C	0	45.2	910	I
	82	4.48569	2	147.82							25	1.69973	2	144.87		731	0.334128	X - Y	C - C	0	37.61	174	X											915	0.244053	X - Y	C - C	0	38.76	917	I
	87	1.18086	2	127.28							27	5.13786	2	141.64		2423	0.931909	X - Y	C - C	0	37.63	180	X											917	0.754434	X - Y	C - C	0	39.46	919	I
	97	1.03591	2	147.29							28	0.625835	2	133.28		1835	0.85996	X - Y	C - C	0	37.64	182	X											923	0.545971	X - Y	C - C	0	38.44	932	I
	105	0.933084	2	121.41							29	0.647205	2	122.5		1426	0.330372	X - Y	C - C	0	37.67	184	X											924	0.125829	X - Y	C - C	0	38.77	941	I
	108	0.183382	2	137.93							30	0.289241	2	109.96		2900	0.806619	X - Y	C - C	0	37.7	187	X											928	1.38	X - Y	C - C	0	35.44	944	I
	109	0.358542	2	134.19							33	0.786156	2	128.87		2186	0.352579	X - Y	C - C	0	37.72	192	X											937	0.256484	X - Y	C - C	0	36.57	949	I
	110	0.286274	2	143.69							35	0.833144	2	143.17		329	0.16836	X - Y	C - C	0	37.76	193	X											942	1.11707	X - Y	C - C	0	39.03	952	I
	111	0.395816	2	144.65							37	0.41752	2	146.93		1332	0.248271	X - Y	C - C	0	37.78	196	X											943	0.711165	X - Y	C - C	0	43.45	957	I
	113	0.478613	2	124.81							38	1.55337	2	149.12		58	0.561701	X - Y	C - C	0	37.8	206	X											967	0.930218	X - Y	C - C	0	35.3	961	I
	114	0.360438	2	111.29							39	1.89387	2	135.43		2404	0.272818	X - Y	C - C	0	37.82	210	X											970	0.262341	X - Y	C - C	0	36.68	972	I
	115	0.161822	2	143.39							41	1.97689	2	133.95		917	0.586822	X - Y	C - C	0	37.86	217	X											971	0.582027	X - Y	C - C	0	41.48	978	I
	120	0.413218	2	143.26							43	0.89243	2	139.02		140	0.671857	X - Y	C - C	0	37.87	218	X											973	0.345321	X - Y	C - C	0	48.95	980	I
	121	0.324719	2	136.05							44	0.703874	2	134.24		2759	0.546735	X - Y	C - C	0	37.92	219	X											986	0.57674	X - Y	C - C	0	37.85	984	I
	122	0.702749	2	136.05							45	0.291272	2	147.08		1022	0.201575	X - Y	C - C	0	37.93	220	X											1003	0.174731	X - Y	C - C	0	44.56	991	I
	124	1.67749	2	127.87							48	0.467376	2	138.34		45	0.547416	X - Y	C - C	0	37.94	225	X											1007	0.27886	X - Y	C - C	0	35.29	996	I
	126	0.886603	2	140.75							49	1.35461	2	142.54		862	0.802303	X - Y	C - C	0	37.97	229	X											1021	0.967412	X - Y	C - C	0	44.26	998	I
	127	1.69973	2	144.87							50	0.591747	2	123.12		334	0.676094	X - Y	C - C	0	37.98	232	X											1037	0.214982	X - Y	C - C	0	46.68	1002	I
	129	5.13786	2	141.64							51	0.816253	2	125.41		1098	0.279414	X - Y	C - C	0	37.99	234	X											1041	1.19535	X - Y	C - C	0	46.11	1010	I
	130	0.625835	2	133.28							52	0.646393	2	137.8		1504	0.360489	X - Y	C - C	0	37.99	235	X											1042	0.722756	X - Y	C - C	0	38.85	1012	I
	131	0.647205	2	122.5							54	1.94648	2	144.11		1073	0.262452	X - Y	C - C	0	38.01	238	X											1049	0.938002	X - Y	C - C	0	36.69	1013	I
	132	0.289241	2	109.96							57	0.847562	2	124.34		604	0.832086	X - Y	C - C	0	38.06	243	X											1051	1.10862	X - Y	C - C	0	49.69	1015	I
	135	0.786156	2	128.87							58	1.79065	2	126.26		271	0.460723	X - Y	C - C	0	38.07	245	X											1052	0.516083	X - Y	C - C	0	46.3	1017	I
	137	0.833144	2	143.17							60	0.743131	2	124.7		1049	0.978371	X - Y	C - C	0	38.09	247	X											1056	1.27561	X - Y	C - C	0	36.06	1019	I
	139	0.41752	2	146.93							62	2.1755	2	124.95		304	0.251639	X - Y	C - C	0	38.11	253	X											1071	0.538354	X - Y	C - C	0	32.51	1025	I
	140	1.55337	2	149.12							63	1.1704	2	127.35		2828	0.714109	X - Y	C - C	0	38.11	256	X											1087	0.13267	X - Y	C - C	0	36.17	1033	I
	141	1.89387	2	135.43							65	1.10291	2	135.15		2220	0.694337	X - Y	C - C	0	38.2	257	X											1102	0.26554	X - Y	C - C	0	33.8	1034	I
	143	1.97689	2	133.95							66	1.68533	2	137.84		2599	0.814723	X - Y	C - C	0	38.25	261	X											1109	0.734017	X - Y	C - C	0	46.7	1038	I
	145	0.89243	2	139.02							67	1.11638	2	121.43		293	1.00967	X - Y	C - C	0	38.37	264	X											1111	0.643112	X - Y	C - C	0	38.58	1054	I
	146	0.703874	2	134.24							70	0.466346	2	147.21		368	0.663747	X - Y	C - C	0	38.37	269	X											1118	0.589944	X - Y	C - C	0	45.24	1061	I
	147	0.291272	2	147.08							80	0.58456	2	137.89		226	0.754658	X - Y	C - C	0	38.43	271	X											1145	0.300369	X - Y	C - C	0	38.67	1064	I
	150	0.467376	2	138.34							81	0.624109	2	137.08		1149	0.545971	X - Y	C - C	0	38.44	273	X											1147	0.787934	X - Y	C - C	0	46.55	1065	I
	151	1.35461	2	142.54							82	1.081	2	131.76		207	1.11738	X - Y	C - C	0	38.53	274	X											1158	0.157317	X - Y	C - C	0	48.76	1068	I
	152	0.591747	2	123.12							83	1.58922	2	125.69		944	0.243506	X - Y	C - C	0	38.56	277	X											1160	0.757665	X - Y	C - C	0	45.01	1083	I
	153	0.816253	2	125.41							84	0.234815	2	133.76		1960	0.308256	X - Y	C - C	0	38.57	282	X											1162	0.912135	X - Y	C - C	0	31.48	1087	I
	154	0.646393	2	137.8							85	0.578563	2	137.37		1400	0.643112	X - Y	C - C	0	38.58	292	X											1168	0.158975	X - Y	C - C	0	46.91	1105	I
	156	1.94648	2	144.11							87	0.929135	2	143.79		2020	0.872034	X - Y	C - C	0	38.65	315	X											1171	0.17004	X - Y	C - C	0	35.11	1106	I
	159	0.847562	2	124.34							88	0.207298	2	136.92		1510	0.462024	X - Y	C - C	0	38.66	322	X											1173	0.929395	X - Y	C - C	0	48.93	1117	I
	160	1.79065	2	126.26							89	2.76094	2	142.23		2255	0.752008	X - Y	C - C	0	38.66	339	X											1178	0.804522	X - Y	C - C	0	49.99	1122	I
	162	0.743131	2	124.7							90	1.47988	2	125.48		534	0.262309	X - Y	C - C	0	38.67	343	X											1182	0.83231	X - Y	C - C	0	37.9	1132	I
	164	2.1755	2	124.95							91	0.552056	2	137.57		1444	0.300369	X - Y	C - C	0	38.67	347	X											1185	0.365664	X - Y	C - C	0	34.95	1133	I
	165	1.1704	2	127.35							93	0.746219	2	139.67		2270	0.095047	X - Y	C - C	0	38.68	370	X											1186	0.462024	X - Y	C - C	0	38.66	1134	I
	167	1.10291	2	135.15							96	2.30548	2	142.86		2844	0.417752	X - Y	C - C	0	38.7	372	X											1199	0.281468	X - Y	C - C	0	49.55	1140	I
	168	1.68533	2	137.84							97	3.29545	2	132.62		1139	0.244053	X - Y	C - C	0	38.76	377	X											1204	0.598694	X - Y	C - C	0	48.82	1160	I
	169	1.11638	2	121.43							98	1.30174	2	123.3		1150	0.125829	X - Y	C - C	0	38.77	382	X											1208	1.07886	X - Y	C - C	0	45.12	1170	I
	172	0.466346	2	147.21							101	1.35217	2	128.38		1291	0.280287	X - Y	C - C	0	38.84	388	X											1217	0.51039	X - Y	C - C	0	45	1171	I
	182	0.58456	2	137.89							102	1.04559	2	130.91		370	0.536101	X - Y	C - C	0	38.85	392	X											1227	0.463636	X - Y	C - C	0	35.17	1173	I
	183	0.624109	2	137.08							105	0.660315	2	138.2		1312	0.722756	X - Y	C - C	0	38.85	396	X											1230	0.461691	X - Y	C - C	0	39.39	1175	I
	184	1.081	2	131.76							106	0.240535	2	118.64		2358	0.179016	X - Y	C - C	0	38.86	398	X											1242	1.59544	X - Y	C - C	0	37.37	1183	I
	185	1.58922	2	125.69							107	1.36923	2	115.68		1198	0.369369	X - Y	C - C	0	38.88	400	X											1246	0.645223	X - Y	C - C	0	31.86	1197	I
	186	0.234815	2	133.76							108	1.45217	2	127.62		2036	0.437353	X - Y	C - C	0	38.89	407	X											1259	0.296572	X - Y	C - C	0	49.31	1198	I
	187	0.578563	2	137.37							109	1.22327	2	131.52		345	1.10265	X - Y	C - C	0	38.95	411	X											1263	0.554824	X - Y	C - C	0	45.5	1208	I
	189	0.929135	2	143.79							110	0.770644	2	145.98		755	0.308114	X - Y	C - C	0	38.95	412	X											1267	0.832919	X - Y	C - C	0	35.24	1216	I
	190	0.207298	2	136.92							111	0.644735	2	141.99		1075	0.720691	X - Y	C - C	0	38.99	425	X											1284	2.3229	X - Y	C - C	0	45.76	1221	I
	191	2.76094	2	142.23							114	0.231455	2	137.92		1872	0.239751	X - Y	C - C	0	39	426	X											1291	0.375379	X - Y	C - C	0	45.91	1226	I
	192	1.47988	2	125.48							115	1.20499	2	130.89		869	0.220756	X - Y	C - C	0	39.02	432	X											1304	0.758621	X - Y	C - C	0	45.29	1236	I
	193	0.552056	2	137.57							116	1.21424	2	142.25		255	0.777397	X - Y	C - C	0	39.03	434	X											1306	2.2254	X - Y	C - C	0	35.87	1241	I
	195	0.746219	2	139.67							118	0.391244	2	109.85		1177	1.11707	X - Y	C - C	0	39.03	437	X											1312	1.40707	X - Y	C - C	0	36.43	1245	I
	198	2.30548	2	142.86							120	0.207376	2	106.24		2848	0.805284	X - Y	C - C	0	39.13	439	X											1321	0.622807	X - Y	C - C	0	34.86	1259	I
	199	3.29545	2	132.62							121	3.53674	2	145.89		99	0.667746	X - Y	C - C	0	39.14	459	X											1331	0.179886	X - Y	C - C	0	41.42	1262	I
	200	1.30174	2	123.3							122	2.13682	2	141.04		34	0.31225	X - Y	C - C	0	39.16	462	X											1343	1.50986	X - Y	C - C	0	45.16	1280	I
	203	1.35217	2	128.38							123	1.56689	2	135.72		2789	0.416066	X - Y	C - C	0	39.21	468	X											1348	0.643442	X - Y	C - C	0	35.51	1287	I
	204	1.04559	2	130.91							124	1.23601	2	109.44		1578	0.461691	X - Y	C - C	0	39.39	476	X											1350	0.208048	X - Y	C - C	0	45.74	1297	I
	207	0.660315	2	138.2							125	1.16087	2	115.28		1042	1.22097	X - Y	C - C	0	39.4	481	X											1358	0.193192	X - Y	C - C	0	46.66	1298	I
	208	0.240535	2	118.64							127	0.261288	2	119.28		1141	0.754434	X - Y	C - C	0	39.46	482	X											1371	0.760913	X - Y	C - C	0	44.24	1306	I
	209	1.36923	2	115.68							130	0.926025	2	126.6		2743	0.243162	X - Y	C - C	0	39.54	489	X											1373	0.145714	X - Y	C - C	0	46.5	1320	I
	210	1.45217	2	127.62							131	0.566167	2	122.31		2744	1.40996	X - Y	C - C	0	39.67	490	X											1381	0.381626	X - Y	C - C	0	44.99	1325	I
	211	1.22327	2	131.52							132	0.723252	2	138.98		560	0.912904	X - Y	C - C	0	39.7	493	X											1385	0.462894	X - Y	C - C	0	46.15	1331	I
	212	0.770644	2	145.98							133	0.461843	2	134.95		2360	0.375885	X - Y	C - C	0	39.73	497	X											1390	0.998706	X - Y	C - C	0	44.58	1334	I
	213	0.644735	2	141.99							134	0.125008	2	141.92		882	0.123479	X - Y	C - C	0	39.78	503	X											1397	1.57116	X - Y	C - C	0	40.25	1339	I
	216	0.231455	2	137.92							135	0.562923	2	124.28		2678	0.422514	X - Y	C - C	0	39.79	519	X											1407	0.728572	X - Y	C - C	0	46.44	1342	I
	217	1.20499	2	130.89							136	1.68925	2	147.36		960	0.280887	X - Y	C - C	0	39.8	529	X											1413	0.304946	X - Y	C - C	0	42.47	1353	I
	218	1.21424	2	142.25							138	0.368447	2	129.94		889	0.072635	X - Y	C - C	0	39.81	534	X											1420	0.758042	X - Y	C - C	0	42.4	1361	I
	220	0.391244	2	109.85							140	1.20042	2	126.74		1436	0.971735	X - Y	C - C	0	39.81	537	X											1423	0.370383	X - Y	C - C	0	45	1366	I
	222	0.207376	2	106.24							141	1.45262	2	141.57		169	1.18172	X - Y	C - C	0	39.85	540	X											1424	0.85996	X - Y	C - C	0	37.64	1375	I
	223	3.53674	2	145.89							142	1.01936	2	127.14		2696	0.909777	X - Y	C - C	0	39.86	541	X											1443	1.25393	X - Y	C - C	0	48.23	1381	I
	224	2.13682	2	141.04							143	1.05872	2	145.42		2853	0.84502	X - Y	C - C	0	39.97	546	X											1452	0.421612	X - Y	C - C	0	41.14	1385	I
	225	1.56689	2	135.72							144	1.49767	2	130.41		1071	0.167729	X - Y	C - C	0	39.99	548	X											1454	1.9186	X - Y	C - C	0	48.31	1387	I
	226	1.23601	2	109.44							146	1.6691	2	134.8		133	0.821076	X - Y	C - C	0	40.04	550	X											1455	0.101542	X - Y	C - C	0	41.29	1392	I
	227	1.16087	2	115.28							148	0.732031	2	117.73		121	0.363156	X - Y	C - C	0	40.1	553	X											1466	1.46387	X - Y	C - C	0	37.16	1393	I
	229	0.261288	2	119.28							150	1.04589	2	115.13		1324	0.202932	X - Y	C - C	0	40.24	555	X											1490	1.00468	X - Y	C - C	0	44.68	1397	I
	232	0.926025	2	126.6							153	1.75108	2	139.71		1133	0.309348	X - Y	C - C	0	40.28	565	X											1499	1.81399	X - Y	C - C	0	38.39	1423	I
	233	0.566167	2	122.31							154	3.91685	2	127.55		2257	0.380795	X - Y	C - C	0	40.28	579	X											1510	0.537766	X - Y	C - C	0	34.31	1425	I
	234	0.723252	2	138.98							155	0.457991	2	121.48		2643	0.534476	X - Y	C - C	0	40.29	588	X											1512	0.348154	X - Y	C - C	0	48.59	1427	I
	235	0.461843	2	134.95							157	0.578596	2	122.07		1024	0.367655	X - Y	C - C	0	40.44	596	X											1517	0.54866	X - Y	C - C	0	41.05	1433	I
	236	0.125008	2	141.92							159	1.15412	2	116.4		2753	0.652527	X - Y	C - C	0	40.61	597	X											1524	0.227216	X - Y	C - C	0	34.75	1440	I
	237	0.562923	2	124.28							160	0.755767	2	145.31		2319	0.340619	X - Y	C - C	0	40.83	604	X											1531	0.431596	X - Y	C - C	0	42.35	1445	I
	238	1.68925	2	147.36							161	0.69201	2	116.25		1767	0.492545	X - Y	C - C	0	40.86	609	X											1538	0.091876	X - Y	C - C	0	43.72	1465	I
	240	0.368447	2	129.94							162	1.73458	2	142.66		2549	0.829345	X - Y	C - C	0	40.87	616	X											1540	0.243801	X - Y	C - C	0	32.5	1470	I
	242	1.20042	2	126.74							163	0.569874	2	136.04		1962	0.54866	X - Y	C - C	0	41.05	625	X											1552	1.3996	X - Y	C - C	0	47.03	1482	I
	243	1.45262	2	141.57							164	2.08738	2	127.56		2313	1.16372	X - Y	C - C	0	41.08	627	X											1558	0.872034	X - Y	C - C	0	38.65	1487	I
	244	1.01936	2	127.14							168	0.850521	2	123.57		1109	0.28073	X - Y	C - C	0	41.11	644	X											1572	0.437353	X - Y	C - C	0	38.89	1488	I
	245	1.05872	2	145.42							169	0.792501	2	139.27		1879	0.421612	X - Y	C - C	0	41.14	653	X											1590	0.314617	X - Y	C - C	0	45.64	1496	I
	246	1.49767	2	130.41							172	1.27748	2	132.92		1883	0.101542	X - Y	C - C	0	41.29	662	X											1599	0.4864	X - Y	C - C	0	36.39	1504	I
	248	1.6691	2	134.8							173	0.297499	2	115.3		2554	0.083329	X - Y	C - C	0	41.3	663	X											1600	1.10743	X - Y	C - C	0	45.07	1506	I
	250	0.732031	2	117.73							175	1.28243	2	139.17		165	0.556772	X - Y	C - C	0	41.32	665	X											1602	0.167375	X - Y	C - C	0	46.69	1527	I
	252	1.04589	2	115.13							176	0.86285	2	112.57		2701	1.13037	X - Y	C - C	0	41.39	666	X											1606	0.914154	X - Y	C - C	0	48.65	1532	I
	255	1.75108	2	139.71							179	1.13204	2	128.61		2927	1.06908	X - Y	C - C	0	41.41	681	X											1620	1.52987	X - Y	C - C	0	49.67	1536	I
	256	3.91685	2	127.55							182	1.03761	2	141.68		1711	0.179886	X - Y	C - C	0	41.42	682	X											1624	0.265254	X - Y	C - C	0	44.89	1538	I
	257	0.457991	2	121.48							184	0.275461	2	127.58		632	0.28096	X - Y	C - C	0	41.51	687	X											1638	0.426198	X - Y	C - C	0	47.18	1540	I
	259	0.578596	2	122.07							185	0.687255	2	117.81		628	0.966774	X - Y	C - C	0	41.54	688	X											1678	0.352579	X - Y	C - C	0	37.72	1542	I
	261	1.15412	2	116.4							188	0.862986	2	130.2		1852	0.78014	X - Y	C - C	0	41.54	692	X											1681	0.33004	X - Y	C - C	0	41.55	1544	I
	262	0.755767	2	145.31							189	3.67674	2	130.03		2189	0.33004	X - Y	C - C	0	41.55	695	X											1683	0.727351	X - Y	C - C	0	35.87	1545	I
	263	0.69201	2	116.25							190	0.789444	2	131.53		2246	0.472761	X - Y	C - C	0	41.59	696	X											1706	0.379657	X - Y	C - C	0	37.1	1560	I
	264	1.73458	2	142.66							195	0.438458	2	133.13		2287	0.33371	X - Y	C - C	0	41.59	697	X											1710	0.656764	X - Y	C - C	0	45.28	1564	I
	265	0.569874	2	136.04							196	0.655835	2	128.11		2551	0.703848	X - Y	C - C	0	41.6	700	X											1720	0.472761	X - Y	C - C	0	41.59	1569	I
	266	2.08738	2	127.56							197	0.721499	2	132.36		2343	0.149656	X - Y	C - C	0	41.72	711	X											1723	0.303073	X - Y	C - C	0	46.79	1572	I
	270	0.850521	2	123.57							198	0.568203	2	105.68		2399	0.110135	X - Y	C - C	0	41.72	716	X											1726	0.752008	X - Y	C - C	0	38.66	1573	I
	271	0.792501	2	139.27							199	0.473661	2	141.86		1769	0.80705	X - Y	C - C	0	41.78	717	X											1738	0.095047	X - Y	C - C	0	38.68	1578	I
	274	1.27748	2	132.92							202	0.684343	2	133.58		2921	0.501516	X - Y	C - C	0	41.88	719	X											1740	0.253801	X - Y	C - C	0	36.73	1581	I
	275	0.297499	2	115.3							205	0.798979	2	137.62		2470	0.164566	X - Y	C - C	0	42.04	725	X											1746	1.15652	X - Y	C - C	0	38.82	1583	I
	277	1.28243	2	139.17							206	0.578175	2	144.09		1020	0.634174	X - Y	C - C	0	42.06	727	X											1750	0.33371	X - Y	C - C	0	41.59	1589	I
	278	0.86285	2	112.57							208	2.19078	2	127.16		2645	0.434874	X - Y	C - C	0	42.13	730	X											1759	0.368633	X - Y	C - C	0	46.66	1592	I
	281	1.13204	2	128.61							210	0.253007	2	136.39		2524	0.462168	X - Y	C - C	0	42.16	742	X											1764	1.92597	X - Y	C - C	0	47.62	1593	I
	284	1.03761	2	141.68							211	0.834282	2	141.39		1547	0.329045	X - Y	C - C	0	42.24	743	X											1769	1.16372	X - Y	C - C	0	41.08	1600	I
	286	0.275461	2	127.58							212	1.01362	2	131.14		693	0.145761	X - Y	C - C	0	42.25	750	X											1776	0.582727	X - Y	C - C	0	44.31	1601	I
	287	0.687255	2	117.81							213	0.958313	2	145.44		1936	0.215275	X - Y	C - C	0	42.27	752	X											1804	0.179016	X - Y	C - C	0	38.86	1603	I
	290	0.862986	2	130.2							214	1.50812	2	145.84		714	0.520496	X - Y	C - C	0	42.34	753	X											1806	0.375885	X - Y	C - C	0	39.73	1607	I
	291	3.67674	2	130.03							216	0.71496	2	124.71		1979	0.431524	X - Y	C - C	0	42.36	754	X											1839	0.110135	X - Y	C - C	0	41.72	1611	I
	292	0.789444	2	131.53							217	0.920548	2	117.75		2446	1.00484	X - Y	C - C	0	42.38	755	X											1841	0.272818	X - Y	C - C	0	37.82	1622	I
	297	0.438458	2	133.13							218	1.4374	2	143.48		1831	0.758042	X - Y	C - C	0	42.4	758	X											1852	0.931909	X - Y	C - C	0	37.63	14	X
	298	0.655835	2	128.11							222	0.766094	2	143.49		38	0.464053	X - Y	C - C	0	42.47	760	X											1868	0.44524	X - Y	C - C	0	35.54	16	X
	299	0.721499	2	132.36							225	0.683455	2	120.55		1818	0.304946	X - Y	C - C	0	42.47	765	X											1875	0.484097	X - Y	C - C	0	48.42	26	X
	300	0.568203	2	105.68							226	1.22348	2	137.13		756	0.441721	X - Y	C - C	0	42.51	766	X											1890	0.768708	X - Y	C - C	0	49.85	29	X
	301	0.473661	2	141.86							227	0.52189	2	146.32		2717	0.70666	X - Y	C - C	0	42.54	768	X											1908	1.04166	X - Y	C - C	0	49.49	31	X
	304	0.684343	2	133.58							228	0.44845	2	142.76		1744	0.707169	X - Y	C - C	0	42.55	775	X											1914	0.191824	X - Y	C - C	0	37.25	33	X
	307	0.798979	2	137.62							229	1.40111	2	135.49		1088	0.605299	X - Y	C - C	0	42.74	781	X											1921	1.07269	X - Y	C - C	0	37.5	36	X
	308	0.578175	2	144.09							230	0.15155	2	112.22		236	0.46153	X - Y	C - C	0	42.75	785	X											1923	0.276745	X - Y	C - C	0	47.83	37	X
	310	2.19078	2	127.16							232	1.2609	2	125.13		269	0.442567	X - Y	C - C	0	42.75	787	X											1931	0.462168	X - Y	C - C	0	42.16	39	X
	312	0.253007	2	136.39							233	1.24801	2	145.2		835	0.76459	X - Y	C - C	0	42.75	795	X											1948	0.679467	X - Y	C - C	0	35.11	41	X
	313	0.834282	2	141.39							234	1.01259	2	126.37		1240	0.350534	X - Y	C - C	0	42.79	797	X											1953	0.703848	X - Y	C - C	0	41.6	47	X
	314	1.01362	2	131.14							235	0.657391	2	130.42		323	0.791604	X - Y	C - C	0	42.94	800	X											1989	0.814723	X - Y	C - C	0	38.25	55	X
	315	0.958313	2	145.44							236	0.952849	2	125.67		2091	0.183817	X - Y	C - C	0	43.02	803	X											1999	0.777165	X - Y	C - C	0	36.26	58	X
	316	1.50812	2	145.84							238	0.675102	2	134.96		2057	0.51805	X - Y	C - C	0	43.03	805	X											2009	1.09336	X - Y	C - C	0	48.69	59	X
	318	0.71496	2	124.71							239	0.687446	2	109.96		1823	0.484125	X - Y	C - C	0	43.15	810	X											2021	0.487097	X - Y	C - C	0	47.86	62	X
	319	0.920548	2	117.75							240	0.340244	2	112.3		487	1.27989	X - Y	C - C	0	43.18	811	X											2024	0.434874	X - Y	C - C	0	42.13	64	X
	320	1.4374	2	143.48							241	1.66416	2	123.96		119	0.589564	X - Y	C - C	0	43.3	812	X											2036	0.575226	X - Y	C - C	0	36.62	65	X
	324	0.766094	2	143.49							242	2.4682	2	125.67		1178	0.711165	X - Y	C - C	0	43.45	816	X											2042	1.21782	X - Y	C - C	0	36.36	72	X
	327	0.683455	2	120.55							243	0.320711	2	122.79		381	0.824833	X - Y	C - C	0	43.53	820	X											2053	0.82433	X - Y	C - C	0	30.38	75	X
	328	1.22348	2	137.13							247	0.545118	2	117.37		1993	0.091876	X - Y	C - C	0	43.72	822	X											2056	0.339688	X - Y	C - C	0	35.43	85	X
	329	0.52189	2	146.32							248	0.306224	2	123.86		791	1.76681	X - Y	C - C	0	43.76	824	X											2061	1.37912	X - Y	C - C	0	39.74	87	X
	330	0.44845	2	142.76							249	0.957329	2	117.72		340	0.577263	X - Y	C - C	0	43.95	834	X											2064	2.7044	X - Y	C - C	0	49.41	92	X
	331	1.40111	2	135.49							250	0.644578	2	127.83		965	0.91428	X - Y	C - C	0	43.98	837	X											2079	3.60425	X - Y	C - C	0	44.75	99	X
	332	0.15155	2	112.22							251	0.552494	2	120.47		1026	0.201628	X - Y	C - C	0	43.98	838	X											2080	0.844585	X - Y	C - C	0	44.64	102	X
	334	1.2609	2	125.13							252	0.870569	2	143.77		581	0.348762	X - Y	C - C	0	43.99	842	X											2091	0.854945	X - Y	C - C	0	37.5	105	X
	335	1.24801	2	145.2							254	0.456787	2	128.09		2566	0.465696	X - Y	C - C	0	44.03	850	X											2092	1.40996	X - Y	C - C	0	39.67	110	X
	336	1.01259	2	126.37							255	2.43019	2	121.61		302	0.82072	X - Y	C - C	0	44.09	855	X											2095	0.817343	X - Y	C - C	0	49.73	116	X
	337	0.657391	2	130.42							256	1.44619	2	128.22		410	0.426861	X - Y	C - C	0	44.11	856	X											2097	0.143934	X - Y	C - C	0	49.59	119	X
	338	0.952849	2	125.67							259	1.3392	2	134.02		451	0.434071	X - Y	C - C	0	44.14	857	X											2099	0.652527	X - Y	C - C	0	40.61	124	X
	340	0.675102	2	134.96							261	1.41836	2	138.34		880	0.093205	X - Y	C - C	0	44.22	864	X											2101	0.354055	X - Y	C - C	0	47.83	126	X
	341	0.687446	2	109.96							263	0.598067	2	110.38		1352	0.896264	X - Y	C - C	0	44.25	870	X											2107	0.984513	X - Y	C - C	0	36.29	128	X
	342	0.340244	2	112.3							264	2.09342	2	129.39		1757	0.408602	X - Y	C - C	0	44.25	877	X											2110	0.596618	X - Y	C - C	0	45.59	130	X
	343	1.66416	2	123.96							265	0.875191	2	135.4		1283	0.967412	X - Y	C - C	0	44.26	885	X											2124	0.416066	X - Y	C - C	0	39.21	135	X
	344	2.4682	2	125.67							266	0.716397	2	108.34		2236	0.53525	X - Y	C - C	0	44.31	888	X											2131	2.05521	X - Y	C - C	0	48.87	142	X
	345	0.320711	2	122.79							267	1.78192	2	140.61		2320	0.582727	X - Y	C - C	0	44.31	891	X											2140	2.53685	X - Y	C - C	0	42.16	146	X
	349	0.545118	2	117.37							269	0.265449	2	121.81		2489	0.232644	X - Y	C - C	0	44.36	895	X											2143	0.810323	X - Y	C - C	0	49.45	156	X
	350	0.306224	2	123.86							270	0.533114	2	130.14		213	0.557248	X - Y	C - C	0	44.42	898	X											2148	0.774881	X - Y	C - C	0	46.99	157	X
	351	0.957329	2	117.72							271	0.555235	2	122.53		151	0.835772	X - Y	C - C	0	44.45	900	X											2151	0.714109	X - Y	C - C	0	38.11	163	X
	352	0.644578	2	127.83							273	1.58435	2	110.33		354	0.613046	X - Y	C - C	0	44.5	906	X											2158	0.417752	X - Y	C - C	0	38.7	164	X
	353	0.552494	2	120.47							274	0.758007	2	138.7		86	0.387014	X - Y	C - C	0	44.51	909	X											2160	0.805284	X - Y	C - C	0	39.13	168	X
	354	0.870569	2	143.77							275	1.51281	2	146.39		142	1.22913	X - Y	C - C	0	44.56	918	X											2161	0.976574	X - Y	C - C	0	45.62	172	X
	356	0.456787	2	128.09							277	1.11319	2	127.97		1260	0.174731	X - Y	C - C	0	44.56	930	X											2172	1.08108	X - Y	C - C	0	40.5	173	X
	357	2.43019	2	121.61							278	0.200225	2	110.86		1790	0.998706	X - Y	C - C	0	44.58	933	X											2181	1.0273	X - Y	C - C	0	36.42	183	X
	358	1.44619	2	128.22							279	0.723052	2	127.44		2228	0.320539	X - Y	C - C	0	44.61	939	X											2193	0.806619	X - Y	C - C	0	37.7	192	X
	361	1.3392	2	134.02							281	5.4613	2	138.13		2293	0.515776	X - Y	C - C	0	44.61	940	X											2208	1.06908	X - Y	C - C	0	41.41	193	X
	363	1.41836	2	138.34							282	0.743434	2	145.28		2687	0.479782	X - Y	C - C	0	44.64	945	X											2216	0.239313	X - Y	C - C	0	48.24	197	X
	365	0.598067	2	110.38							284	5.36844	2	137.13		1105	0.792452	X - Y	C - C	0	44.65	948	X											2224	0.548034	X - Y	C - C	0	36.24	203	X
	366	2.09342	2	129.39							286	1.21587	2	115.94		2353	0.739652	X - Y	C - C	0	44.71	955	X											2243	0.332744	X - Y	C - C	0	48.86	206	X
	367	0.875191	2	135.4							293	1.6007	2	144.56		1175	0.476808	X - Y	C - C	0	44.72	957	X											4	0.359124	Y - Y	C - C	0	45.68	208	X
	368	0.716397	2	108.34							294	0.95626	2	133.71		108	0.569725	X - Y	C - C	0	44.77	973	X											6	0.468722	Y - Y	C - C	0	33.69	212	X
	369	1.78192	2	140.61							295	0.193196	2	131.14		197	0.68089	X - Y	C - C	0	44.82	976	X											8	0.659887	Y - Y	C - C	0	36.19	216	X
	371	0.265449	2	121.81							298	1.10638	2	139.19		2114	0.265254	X - Y	C - C	0	44.89	977	X											17	0.268281	Y - Y	C - C	0	36.99	218	X
	372	0.533114	2	130.14							302	2.63651	2	140.04		96	0.331081	X - Y	C - C	0	44.9	978	X											18	0.601626	Y - Y	C - C	0	44.54	226	X
	373	0.555235	2	122.53							303	0.898326	2	117.02		79	1.19378	X - Y	C - C	0	44.97	980	X											19	0.163428	Y - Y	C - C	0	48.03	232	X
	375	1.58435	2	110.33							305	0.738632	2	119.51		26	0.539664	X - Y	C - C	0	45	981	X											20	0.427679	Y - Y	C - C	0	31.62	236	X
	376	0.758007	2	138.7							306	1.0292	2	127.06		1558	0.51039	X - Y	C - C	0	45	989	X											21	0.286189	Y - Y	C - C	0	42.35	239	X
	377	1.51281	2	146.39							309	1.40008	2	130.58		1777	0.381696	X - Y	C - C	0	45	990	X											30	0.455892	Y - Y	C - C	0	32.52	240	X
	379	1.11319	2	127.97							311	0.996756	2	109.16		1828	0.179605	X - Y	C - C	0	45	991	X											34	0.693342	Y - Y	C - C	0	37.14	243	X
	380	0.200225	2	110.86							313	0.475734	2	126.76		1834	0.370383	X - Y	C - C	0	45	992	X											45	0.765149	Y - Y	C - C	0	43.19	247	X
	381	0.723052	2	127.44							314	1.14536	2	123.08		1465	0.757665	X - Y	C - C	0	45.01	995	X											49	1.43262	Y - Y	C - C	0	48.67	256	X
	383	5.4613	2	138.13							315	0.824442	2	121.73		1628	0.526269	X - Y	C - C	0	45.03	997	X											50	0.095325	Y - Y	C - C	0	45.68	277	X
	384	0.743434	2	145.28							317	0.75672	2	124.65		470	0.225176	X - Y	C - C	0	45.04	999	X											58	0.119864	Y - Y	C - C	0	37.34	282	X
	386	5.36844	2	137.13							319	1.05467	2	115.22		2078	1.10743	X - Y	C - C	0	45.07	1000	X											66	1.09968	Y - Y	C - C	0	43.77	299	X
	388	1.21587	2	115.94							320	0.788119	2	136.35		1542	1.07886	X - Y	C - C	0	45.12	1002	X											78	0.702697	Y - Y	C - C	0	44.61	307	X
	395	1.6007	2	144.56							321	0.888401	2	110.55		1417	0.689291	X - Y	C - C	0	45.18	1003	X											89	0.467498	Y - Y	C - C	0	40.18	324	X
	396	0.95626	2	133.71							322	0.692125	2	136.85		1125	0.470158	X - Y	C - C	0	45.2	1008	X											96	0.357332	Y - Y	C - C	0	40.82	327	X
	397	0.193196	2	131.14							324	0.686006	2	131.63		189	0.671698	X - Y	C - C	0	45.22	1011	X											102	0.115762	Y - Y	C - C	0	37.21	330	X
	400	1.10638	2	139.19							325	0.64674	2	141.95		1408	0.589944	X - Y	C - C	0	45.24	1017	X											111	0.165153	Y - Y	C - C	0	35.41	335	X
	404	2.63651	2	140.04							326	0.73309	2	121.15		1677	0.758621	X - Y	C - C	0	45.29	1019	X											113	0.121086	Y - Y	C - C	0	31.63	340	X
	405	0.898326	2	117.02							328	2.94103	2	127.57		444	1.3257	X - Y	C - C	0	45.31	1030	X											120	0.208005	Y - Y	C - C	0	30.35	349	X
	407	0.738632	2	119.51							330	2.15397	2	133.79		892	0.134566	X - Y	C - C	0	45.39	1033	X											135	1.37464	Y - Y	C - C	0	38.8	351	X
	408	1.0292	2	127.06							332	1.03933	2	137.68		1642	0.136688	X - Y	C - C	0	45.44	1037	X											137	0.127025	Y - Y	C - C	0	39.79	358	X
	411	1.40008	2	130.58							333	0.864092	2	139.11		2546	0.596462	X - Y	C - C	0	45.44	1039	X											143	0.662615	Y - Y	C - C	0	45.75	361	X
	413	0.996756	2	109.16							335	1.0048	2	148.15		251	0.147578	X - Y	C - C	0	45.47	1051	X											147	0.95856	Y - Y	C - C	0	31.08	362	X
	415	0.475734	2	126.76							336	0.781998	2	130.44		877	0.553966	X - Y	C - C	0	45.47	1052	X											151	0.507728	Y - Y	C - C	0	39.52	373	X
	416	1.14536	2	123.08							337	1.14241	2	133.98		1619	0.554824	X - Y	C - C	0	45.5	1058	X											156	0.129279	Y - Y	C - C	0	35.46	376	X
	417	0.824442	2	121.73							338	1.09967	2	119.78		2395	0.237032	X - Y	C - C	0	45.51	1059	X											159	0.116376	Y - Y	C - C	0	35.45	379	X
	419	0.75672	2	124.65							339	1.13864	2	148.88		325	0.554819	X - Y	C - C	0	45.53	1071	X											171	0.106641	Y - Y	C - C	0	45.76	381	X
	421	1.05467	2	115.22							344	0.449551	2	112.54		2769	0.596618	X - Y	C - C	0	45.59	1072	X											173	0.965207	Y - Y	C - C	0	33.89	400	X
	422	0.788119	2	136.35							345	0.316027	2	120.61		1753	0.263553	X - Y	C - C	0	45.6	1074	X											176	0.62881	Y - Y	C - C	0	36.34	402	X
	423	0.888401	2	110.55							346	0.420506	2	122.87		2849	0.976574	X - Y	C - C	0	45.62	1079	X											182	0.122615	Y - Y	C - C	0	38.24	413	X
	424	0.692125	2	136.85							347	0.479952	2	119.17		2065	0.314617	X - Y	C - C	0	45.64	1081	X											185	0.445377	Y - Y	C - C	0	45.78	417	X
	426	0.686006	2	131.63							348	0.455685	2	109.99		28	0.788837	X - Y	C - C	0	45.7	1085	X											196	0.112898	Y - Y	C - C	0	30.97	423	X
	427	0.64674	2	141.95							351	0.340225	2	128.76		244	1.14424	X - Y	C - C	0	45.72	1087	X											204	0.278696	Y - Y	C - C	0	45.77	426	X
	428	0.73309	2	121.15							353	1.26115	2	140		1731	0.208048	X - Y	C - C	0	45.74	1090	X											212	0.09504	Y - Y	C - C	0	45.6	429	X
	430	2.94103	2	127.57							355	0.903685	2	140		1724	0.58146	X - Y	C - C	0	45.86	1091	X											222	0.539284	Y - Y	C - C	0	47.39	447	X
	432	2.15397	2	133.79							357	2.22732	2	136.21		902	0.34156	X - Y	C - C	0	45.91	1092	X											232	0.617449	Y - Y	C - C	0	44.38	456	X
	434	1.03933	2	137.68							358	0.498511	2	146.43		1646	0.251692	X - Y	C - C	0	45.92	1105	X											235	0.962978	Y - Y	C - C	0	49.87	461	X
	435	0.864092	2	139.11							359	2.43429	2	126.4		587	0.72405	X - Y	C - C	0	45.93	1106	X											238	0.740079	Y - Y	C - C	0	38.66	464	X
	437	1.0048	2	148.15							364	0.605562	2	123.86		2305	1.03808	X - Y	C - C	0	45.93	1113	X											246	0.285934	Y - Y	C - C	0	43.33	467	X
	438	0.781998	2	130.44							368	0.794718	2	134.09		385	1.78878	X - Y	C - C	0	45.95	1123	X											250	0.586215	Y - Y	C - C	0	46.85	485	X
	439	1.14241	2	133.98							369	3.84525	2	148.6		1008	0.577423	X - Y	C - C	0	45.97	1124	X											262	0.213868	Y - Y	C - C	0	46.84	499	X
	440	1.09967	2	119.78							370	2.86062	2	141.88		1989	0.963507	X - Y	C - C	0	45.99	1131	X											264	0.292803	Y - Y	C - C	0	32.84	507	X
	441	1.13864	2	148.88							373	0.401255	2	128.7		443	0.438342	X - Y	C - C	0	46	1137	X											269	0.126557	Y - Y	C - C	0	43.3	514	X
	446	0.449551	2	112.54							374	1.17393	2	148.25		2781	0.263792	X - Y	C - C	0	46.01	1149	X											289	0.699327	Y - Y	C - C	0	34.01	521	X
	447	0.316027	2	120.61							375	0.788583	2	139.72		2486	0.583408	X - Y	C - C	0	46.11	1154	X											293	0.489034	Y - Y	C - C	0	43.32	525	X
	448	0.420506	2	122.87							376	0.469858	2	125.31		1781	0.462894	X - Y	C - C	0	46.15	1157	X											295	0.962663	Y - Y	C - C	0	34.63	531	X
	449	0.479952	2	119.17							377	0.567093	2	132.94		2545	1.15592	X - Y	C - C	0	46.29	1158	X											297	0.160115	Y - Y	C - C	0	33.51	540	X
	450	0.455685	2	109.99							379	0.300342	2	125.65		1329	0.516083	X - Y	C - C	0	46.3	1162	X											299	0.359646	Y - Y	C - C	0	45.45	556	X
	453	0.340225	2	128.76							381	0.790651	2	125.99		1810	0.728572	X - Y	C - C	0	46.44	1164	X											305	1.21006	Y - Y	C - C	0	48.67	565	X
	455	1.26115	2	140							382	0.40449	2	118.28		1881	1.12668	X - Y	C - C	0	46.45	1175	X											314	0.617297	Y - Y	C - C	0	45.79	587	X
	457	0.903685	2	140							383	0.630913	2	114.2		494	0.545577	X - Y	C - C	0	46.49	1178	X											315	0.237856	Y - Y	C - C	0	38.63	588	X
	459	2.22732	2	136.21							386	2.42049	2	141.73		505	0.173442	X - Y	C - C	0	46.5	1180	X											321	0.690171	Y - Y	C - C	0	37.28	592	X
	460	0.498511	2	146.43							388	0.717651	2	135		1759	0.145714	X - Y	C - C	0	46.5	1183	X											333	1.27134	Y - Y	C - C	0	38.02	595	X
	461	2.43429	2	126.4							390	3.25557	2	114.9		1010	0.713088	X - Y	C - C	0	46.51	1197	X											338	0.918867	Y - Y	C - C	0	34.38	598	X
	466	0.605562	2	123.86							393	4.8001	2	136.3		2183	0.129659	X - Y	C - C	0	46.53	1207	X											343	0.116916	Y - Y	C - C	0	34.55	599	X
	470	0.794718	2	134.09							394	0.839643	2	128.86		1446	0.787934	X - Y	C - C	0	46.55	1209	X											347	0.293762	Y - Y	C - C	0	37.1	610	X
	471	3.84525	2	148.6							395	0.467739	2	129.05		1740	0.193192	X - Y	C - C	0	46.66	1212	X											353	0.133227	Y - Y	C - C	0	34.57	616	X
	472	2.86062	2	141.88							398	0.253277	2	122.21		2300	0.368633	X - Y	C - C	0	46.66	1213	X											354	0.627718	Y - Y	C - C	0	38.16	617	X
	475	0.401255	2	128.7							399	0.698443	2	113.36		1307	0.214982	X - Y	C - C	0	46.68	1227	X											355	0.717923	Y - Y	C - C	0	48.42	623	X
	476	1.17393	2	148.25							400	0.654775	2	122.86		2082	0.167375	X - Y	C - C	0	46.69	1228	X											356	0.265055	Y - Y	C - C	0	44.11	626	X
	477	0.788583	2	139.72							401	0.548986	2	129.2		1398	0.734017	X - Y	C - C	0	46.7	1231	X											361	0.121211	Y - Y	C - C	0	38.17	637	X
	478	0.469858	2	125.31							402	0.327564	2	125.73		1440	0.635337	X - Y	C - C	0	46.72	1234	X											369	1.79469	Y - Y	C - C	0	36.6	638	X
	479	0.567093	2	132.94							403	0.914797	2	147.75		2846	0.299384	X - Y	C - C	0	46.73	1244	X											370	0.297163	Y - Y	C - C	0	44.1	644	X
	481	0.300342	2	125.65							404	0.124663	2	135.16		2622	0.983362	X - Y	C - C	0	46.75	1254	X											371	0.091452	Y - Y	C - C	0	46.28	645	X
	483	0.790651	2	125.99							405	1.02703	2	128.39		1062	0.463572	X - Y	C - C	0	46.76	1255	X											376	0.581468	Y - Y	C - C	0	37.35	646	X
	484	0.40449	2	118.28							406	1.39125	2	142.32		2249	0.303073	X - Y	C - C	0	46.79	1258	X											379	1.25269	Y - Y	C - C	0	44.5	651	X
	485	0.630913	2	114.2							408	0.414358	2	132.66		257	0.674366	X - Y	C - C	0	46.85	1263	X											383	0.758993	Y - Y	C - C	0	36.07	656	X
	488	2.42049	2	141.73							409	1.03604	2	109.77		811	0.360957	X - Y	C - C	0	46.86	1265	X											387	0.485098	Y - Y	C - C	0	38.49	657	X
	490	0.717651	2	135							410	0.815481	2	124.62		1311	0.784056	X - Y	C - C	0	46.86	1269	X											389	0.631664	Y - Y	C - C	0	37.37	664	X
	492	3.25557	2	114.9							414	2.85559	2	138.52		2274	1.01651	X - Y	C - C	0	46.89	1270	X											392	0.157185	Y - Y	C - C	0	37.32	668	X
	495	4.8001	2	136.3							415	3.99138	2	134.77		1483	0.158975	X - Y	C - C	0	46.91	1284	X											396	0.478596	Y - Y	C - C	0	32.31	672	X
	496	0.839643	2	128.86							416	0.874866	2	125.39		200	0.565353	X - Y	C - C	0	46.95	1285	X											397	1.30442	Y - Y	C - C	0	37.07	674	X
	497	0.467739	2	129.05							423	1.09553	2	145.4		327	0.55969	X - Y	C - C	0	47.13	1290	X											404	0.538979	Y - Y	C - C	0	43.59	677	X
	500	0.253277	2	122.21							424	4.5286	2	145.41		145	1.07904	X - Y	C - C	0	47.15	1295	X											406	0.298563	Y - Y	C - C	0	36.6	681	X
	501	0.698443	2	113.36							426	0.516041	2	144.12		2135	0.426198	X - Y	C - C	0	47.18	1303	X											408	0.348914	Y - Y	C - C	0	37.66	684	X
	502	0.654775	2	122.86							427	0.637296	2	149.57		147	0.725229	X - Y	C - C	0	47.28	1304	X											409	0.129369	Y - Y	C - C	0	43.59	686	X
	503	0.548986	2	129.2							429	0.583651	2	125.56		510	0.187053	X - Y	C - C	0	47.36	1307	X											417	0.827798	Y - Y	C - C	0	46.46	690	X
	504	0.327564	2	125.73							431	0.670871	2	128.86		2109	0.129659	X - Y	C - C	0	47.44	1308	X											419	0.438833	Y - Y	C - C	0	38.65	691	X
	505	0.914797	2	147.75							433	0.321806	2	134.81		2093	0.134119	X - Y	C - C	0	47.45	1310	X											424	0.420216	Y - Y	C - C	0	34.65	692	X
	506	0.124663	2	135.16							434	0.287007	2	129.05		292	0.514871	X - Y	C - C	0	47.46	1319	X											426	0.145642	Y - Y	C - C	0	46.47	696	X
	507	1.02703	2	128.39							438	2.65679	2	133.73		598	0.137731	X - Y	C - C	0	47.47	1322	X											428	0.112147	Y - Y	C - C	0	45	697	X
	508	1.39125	2	142.32							439	0.34781	2	130.11		1775	0.316806	X - Y	C - C	0	47.47	1323	X											432	1.13134	Y - Y	C - C	0	36.18	712	X
	510	0.414358	2	132.66							440	1.11877	2	138.17		1258	0.31461	X - Y	C - C	0	47.5	1324	X											433	0.808145	Y - Y	C - C	0	42.88	713	X
	511	1.03604	2	109.77							443	0.84322	2	139.79		1607	1.17104	X - Y	C - C	0	47.54	1337	X											435	0.101357	Y - Y	C - C	0	34.63	725	X
	512	0.815481	2	124.62							444	1.12171	2	144.59		2655	0.382135	X - Y	C - C	0	47.55	1340	X											438	0.432045	Y - Y	C - C	0	44.2	737	X
	516	2.85559	2	138.52							445	1.15952	2	127.83		1576	0.883556	X - Y	C - C	0	47.57	1346	X											442	0.173948	Y - Y	C - C	0	45	749	X
	517	3.99138	2	134.77							446	0.395968	2	133.53		785	0.858071	X - Y	C - C	0	47.59	1358	X											444	0.701237	Y - Y	C - C	0	49.35	752	X
	518	0.874866	2	125.39							447	0.237068	2	116.53		720	0.263694	X - Y	C - C	0	47.72	1366	X											450	0.541742	Y - Y	C - C	0	37.57	755	X
	525	1.09553	2	145.4							449	1.79463	2	141.98		739	0.198923	X - Y	C - C	0	47.73	1379	X											452	0.583046	Y - Y	C - C	0	34.26	767	X
	526	4.5286	2	145.41							455	1.04888	2	132.32		737	0.837606	X - Y	C - C	0	47.8	1382	X											457	0.082266	Y - Y	C - C	0	34.25	774	X
	528	0.516041	2	144.12							456	0.76354	2	120.11		2516	0.276745	X - Y	C - C	0	47.83	1391	X											459	1.0517	Y - Y	C - C	0	41.37	782	X
	529	0.637296	2	149.57							458	1.43868	2	122.2		578	1.12417	X - Y	C - C	0	47.85	1399	X											461	0.280139	Y - Y	C - C	0	49.78	785	X
	531	0.583651	2	125.56							460	0.848503	2	141.4		2755	0.09402	X - Y	C - C	0	47.85	1404	X											465	0.404836	Y - Y	C - C	0	35.81	792	X
	533	0.670871	2	128.86							461	0.815399	2	128.54		2641	0.487097	X - Y	C - C	0	47.86	1407	X											467	0.577021	Y - Y	C - C	0	47.88	798	X
	535	0.321806	2	134.81							463	0.788294	2	134.74		937	0.475701	X - Y	C - C	0	48.03	1410	X											469	0.579489	Y - Y	C - C	0	47.78	801	X
	536	0.287007	2	129.05							465	0.271468	2	106.19		904	1.60403	X - Y	C - C	0	48.11	1416	X											474	0.241992	Y - Y	C - C	0	48.99	808	X
	540	2.65679	2	133.73							466	0.72287	2	111.16		2629	0.384455	X - Y	C - C	0	48.11	1418	X											477	0.551954	Y - Y	C - C	0	37.28	826	X
	541	0.34781	2	130.11							467	0.29902	2	142.46		571	1.4539	X - Y	C - C	0	48.19	1427	X											481	0.667199	Y - Y	C - C	0	34.08	827	X
	542	1.11877	2	138.17							468	1.27894	2	135.22		383	0.884776	X - Y	C - C	0	48.2	1440	X											493	0.100485	Y - Y	C - C	0	45.6	829	X
	545	0.84322	2	139.79							469	0.576488	2	143.52		2338	0.487468	X - Y	C - C	0	48.2	1455	X											494	0.235627	Y - Y	C - C	0	44.28	836	X
	546	1.12171	2	144.59							471	1.46957	2	126.37		1475	0.330879	X - Y	C - C	0	48.21	1457	X											496	0.365601	Y - Y	C - C	0	47.07	837	X
	547	1.15952	2	127.83							474	3.39782	2	139.95		1513	0.264169	X - Y	C - C	0	48.22	1464	X											498	0.432511	Y - Y	C - C	0	42.77	841	X
	548	0.395968	2	133.53							475	2.4799	2	127.57		357	0.172527	X - Y	C - C	0	48.24	1466	X											499	0.50398	Y - Y	C - C	0	31.76	843	X
	549	0.237068	2	116.53							478	0.594655	2	129.15		2935	0.239313	X - Y	C - C	0	48.24	1469	X											501	0.100618	Y - Y	C - C	0	47.09	844	X
	551	1.79463	2	141.98							479	0.707009	2	130.74		2421	0.120275	X - Y	C - C	0	48.37	1481	X											506	0.207835	Y - Y	C - C	0	44.28	848	X
	557	1.04888	2	132.32							480	2.09216	2	135.92		2453	0.484097	X - Y	C - C	0	48.42	1483	X											509	0.433968	Y - Y	C - C	0	39.8	854	X
	558	0.76354	2	120.11							483	0.373839	2	142.57		1060	0.866536	X - Y	C - C	0	48.43	1485	X											513	0.106304	Y - Y	C - C	0	42.56	855	X
	560	1.43868	2	122.2							484	0.571786	2	126.52		2328	0.447426	X - Y	C - C	0	48.46	1488	X											515	0.387942	Y - Y	C - C	0	45.63	866	X
	562	0.848503	2	141.4							487	0.819316	2	138.55		2278	0.248439	X - Y	C - C	0	48.48	1492	X											519	0.542345	Y - Y	C - C	0	34.21	869	X
	563	0.815399	2	128.54							489	1.01841	2	119.66		1955	0.138504	X - Y	C - C	0	48.54	1494	X											523	1.7844	Y - Y	C - C	0	48.52	879	X
	565	0.788294	2	134.74							490	0.916019	2	131.79		2588	1.4128	X - Y	C - C	0	48.57	1496	X											525	0.516624	Y - Y	C - C	0	44.44	884	X
	567	0.271468	2	106.19							491	0.374611	2	113.84		361	1.06998	X - Y	C - C	0	48.61	1502	X											530	0.448597	Y - Y	C - C	0	40.59	895	X
	568	0.72287	2	111.16							492	1.43834	2	136.34		277	0.770596	X - Y	C - C	0	48.63	1505	X											531	1.63388	Y - Y	C - C	0	45.59	896	X
	569	0.29902	2	142.46							493	1.70333	2	142.07		921	0.706613	X - Y	C - C	0	48.63	1510	X											534	0.719991	Y - Y	C - C	0	33.28	901	X
	570	1.27894	2	135.22							494	2.78092	2	140.14		2089	0.914154	X - Y	C - C	0	48.65	1517	X											535	1.1823	Y - Y	C - C	0	35.35	904	X
	571	0.576488	2	143.52							495	1.57218	2	142.6		1462	0.157317	X - Y	C - C	0	48.76	1523	X											537	0.285328	Y - Y	C - C	0	48.41	907	X
	573	1.46957	2	126.37							496	0.669867	2	129.64		1485	0.198991	X - Y	C - C	0	48.79	1524	X											538	0.300753	Y - Y	C - C	0	37.41	909	X
	576	3.39782	2	139.95							498	0.610751	2	140.66		2890	1.11478	X - Y	C - C	0	48.81	1525	X											543	0.328072	Y - Y	C - C	0	44.05	912	X
	577	2.4799	2	127.57							499	0.885938	2	127.47		2969	0.332744	X - Y	C - C	0	48.86	1528	X											547	0.188861	Y - Y	C - C	0	36.71	921	X
	580	0.594655	2	129.15							500	1.75936	2	142.35		618	0.880371	X - Y	C - C	0	48.9	1531	X											551	0.525038	Y - Y	C - C	0	43.62	927	X
	581	0.707009	2	130.74							501	0.812309	2	141.8		1490	0.929395	X - Y	C - C	0	48.93	1534	X											558	0.904993	Y - Y	C - C	0	48.2	935	X
	582	2.09216	2	135.92							503	0.720474	2	125.51		1218	0.345321	X - Y	C - C	0	48.95	1538	X											559	0.241709	Y - Y	C - C	0	44.33	936	X
	585	0.373839	2	142.57							504	2.15643	2	129.56		1524	0.456024	X - Y	C - C	0	48.98	1546	X											560	0.338116	Y - Y	C - C	0	33.78	960	X
	586	0.571786	2	126.52							505	0.901017	2	123.94		1471	0.126387	X - Y	C - C	0	49.01	1550	X											561	0.257121	Y - Y	C - C	0	37.02	964	X
	589	0.819316	2	138.55							507	2.78145	2	129.83		680	0.887307	X - Y	C - C	0	49.02	1558	X											565	0.084458	Y - Y	C - C	0	48.65	967	X
	591	1.01841	2	119.66							509	1.17797	2	128.54		1826	0.620244	X - Y	C - C	0	49.09	1561	X											567	0.127424	Y - Y	C - C	0	47.74	968	X
	592	0.916019	2	131.79							513	4.48125	2	143.59		366	0.140085	X - Y	C - C	0	49.11	1564	X											569	0.156768	Y - Y	C - C	0	44.66	971	X
	593	0.374611	2	113.84							515	2.84328	2	142.22		2033	0.299224	X - Y	C - C	0	49.26	1569	X											577	0.17997	Y - Y	C - C	0	48.65	974	X
	594	1.43834	2	136.34							517	0.651783	2	140.2		1613	0.296572	X - Y	C - C	0	49.31	1571	X											578	0.206401	Y - Y	C - C	0	37.06	985	X
	595	1.70333	2	142.07							521	0.535295	2	119.68		979	0.541557	X - Y	C - C	0	49.32	1578	X											593	1.15048	Y - Y	C - C	0	45.69	999	X
	596	2.78092	2	140.14							522	2.0564	2	133.09		995	0.128282	X - Y	C - C	0	49.33	1583	X											595	0.231642	Y - Y	C - C	0	37.12	1009	X
	597	1.57218	2	142.6							523	0.830576	2	121.81		1695	0.96563	X - Y	C - C	0	49.35	1597	X											600	0.505054	Y - Y	C - C	0	34.73	1011	X
	598	0.669867	2	129.64							524	1.48541	2	145.46		2499	1.04166	X - Y	C - C	0	49.49	1607	X											605	1.14404	Y - Y	C - C	0	45.33	1014	X
	600	0.610751	2	140.66							525	0.968012	2	148.15		1864	0.322446	X - Y	C - C	0	49.5	1608	X											608	0.962217	Y - Y	C - C	0	42.42	1016	X
	601	0.885938	2	127.47							527	2.84554	2	137.14		1527	0.281468	X - Y	C - C	0	49.55	1626	X											609	0.10247	Y - Y	C - C	0	34.74	1029	X
	602	1.75936	2	142.35							528	1.21829	2	149.37		940	0.207061	X - Y	C - C	0	49.56	1630	X											610	0.919991	Y - Y	C - C	0	41.18	1046	X
	603	0.812309	2	141.8							529	1.31937	2	138.69		2806	0.700634	X - Y	C - C	0	49.57	1635	X											612	0.263482	Y - Y	C - C	0	43.03	1047	X
	605	0.720474	2	125.51							530	0.930082	2	124.65		2749	0.143934	X - Y	C - C	0	49.59	1639	X											613	0.561311	Y - Y	C - C	0	44.67	1049	X
	606	2.15643	2	129.56							531	0.974874	2	138.81		2108	1.52987	X - Y	C - C	0	49.67	1641	X											616	0.143147	Y - Y	C - C	0	40.1	1056	X
	607	0.901017	2	123.94							539	0.46923	2	135.88		1326	1.10862	X - Y	C - C	0	49.69	1645	X											617	0.079315	Y - Y	C - C	0	43.01	1060	X
	609	2.78145	2	129.83							540	1.28576	2	136.01		2747	0.817343	X - Y	C - C	0	49.73	1648	X											619	0.08724	Y - Y	C - C	0	41.93	1075	X
	611	1.17797	2	128.54							541	0.895219	2	139.17		2474	0.768708	X - Y	C - C	0	49.85	1649	X											622	0.907888	Y - Y	C - C	0	48.2	1080	X
	615	4.48125	2	143.59							543	0.227085	2	126.48		158	0.520322	X - Y	C - C	0	49.98	1651	X											624	0.065648	Y - Y	C - C	0	41.85	1084	X
	617	2.84328	2	142.22							544	0.680126	2	128.14		1497	0.804522	X - Y	C - C	0	49.99	1667	X											630	0.259295	Y - Y	C - C	0	45.59	1090	X
	619	0.651783	2	140.2							546	0.894801	2	130.72		928	0.542286	Y - Y	C - C	0	30.01	1668	X											638	0.18099	Y - Y	C - C	0	37.91	1091	X
	623	0.535295	2	119.68							547	0.811766	2	136.33		898	0.309322	Y - Y	C - C	0	30.03	1675	X											643	0.596061	Y - Y	C - C	0	36.79	1094	X
	624	2.0564	2	133.09							549	2.07198	2	145.13		1854	0.371096	Y - Y	C - C	0	30.07	1678	X											646	0.442912	Y - Y	C - C	0	43.02	1103	X
	625	0.830576	2	121.81							550	0.617635	2	131.77		2363	0.554384	Y - Y	C - C	0	30.26	1692	X											649	0.589101	Y - Y	C - C	0	45.34	1107	X
	626	1.48541	2	145.46							551	4.08672	2	141.65		137	0.208005	Y - Y	C - C	0	30.35	1710	X											652	0.566572	Y - Y	C - C	0	40.61	1118	X
	627	0.968012	2	148.15							556	1.75587	2	125.34		888	0.649955	Y - Y	C - C	0	30.72	1711	X											654	1.21921	Y - Y	C - C	0	41.45	1151	X
	629	2.84554	2	137.14							557	3.98074	2	145.85		1705	0.092575	Y - Y	C - C	0	30.94	1715	X											657	0.21708	Y - Y	C - C	0	36.1	1152	X
	630	1.21829	2	149.37							558	0.696446	2	140.22		2373	0.088493	Y - Y	C - C	0	30.94	1718	X											661	0.195477	Y - Y	C - C	0	40.79	1165	X
	631	1.31937	2	138.69							559	0.72765	2	136.4		232	0.112898	Y - Y	C - C	0	30.97	1724	X											664	0.727751	Y - Y	C - C	0	35.32	1168	X
	632	0.930082	2	124.65							562	5.17244	2	141.72		2396	0.091237	Y - Y	C - C	0	31.01	1738	X											666	0.162856	Y - Y	C - C	0	46.79	1172	X
	633	0.974874	2	138.81							565	2.03781	2	148.63		172	0.95856	Y - Y	C - C	0	31.08	1740	X											667	0.646397	Y - Y	C - C	0	47.15	1178	X
	641	0.46923	2	135.88							568	2.88962	2	139.11		1795	0.283128	Y - Y	C - C	0	31.11	1751	X											669	0.737996	Y - Y	C - C	0	47.97	1180	X
	642	1.28576	2	136.01							569	1.54838	2	144.02		848	0.46578	Y - Y	C - C	0	31.27	1754	X											676	0.113194	Y - Y	C - C	0	35.98	1211	X
	643	0.895219	2	139.17							570	0.921731	2	133.39		1227	1.05162	Y - Y	C - C	0	31.36	1755	X											677	0.504393	Y - Y	C - C	0	49	1212	X
	645	0.227085	2	126.48							571	1.13833	2	124.86		20	0.427679	Y - Y	C - C	0	31.62	1764	X											679	0.517202	Y - Y	C - C	0	43.03	1230	X
	646	0.680126	2	128.14							572	1.25658	2	119.22		623	0.118256	Y - Y	C - C	0	31.62	1765	X											684	0.274771	Y - Y	C - C	0	46.77	1232	X
	648	0.894801	2	130.72							573	1.61756	2	124.41		127	0.121086	Y - Y	C - C	0	31.63	1768	X											685	0.46578	Y - Y	C - C	0	31.27	1235	X
	649	0.811766	2	136.33							576	1.42492	2	145.62		607	0.50398	Y - Y	C - C	0	31.76	1769	X											688	1.28554	Y - Y	C - C	0	36.86	1240	X
	651	2.07198	2	145.13							582	2.39453	2	147.87		2397	0.330806	Y - Y	C - C	0	31.82	1774	X											690	0.307454	Y - Y	C - C	0	47.15	1243	X
	652	0.617635	2	131.77							584	1.88606	2	124.92		1507	0.105809	Y - Y	C - C	0	31.83	1775	X											697	0.374545	Y - Y	C - C	0	46.04	1251	X
	653	4.08672	2	141.65							585	7.32972	2	144.75		2893	0.418128	Y - Y	C - C	0	31.84	1783	X											698	0.251591	Y - Y	C - C	0	35.98	1261	X
	658	1.75587	2	125.34							586	3.77637	2	141.55		2903	0.121847	Y - Y	C - C	0	31.85	1786	X											702	0.223475	Y - Y	C - C	0	41.64	1267	X
	659	3.98074	2	145.85							589	1.60289	2	125.88		1181	0.160897	Y - Y	C - C	0	32.1	1788	X											703	0.223861	Y - Y	C - C	0	47.37	1268	X
	660	0.696446	2	140.22							590	2.03922	2	147.15		1205	0.199269	Y - Y	C - C	0	32.1	1789	X											704	0.114811	Y - Y	C - C	0	39.81	1271	X
	661	0.72765	2	136.4							591	2.80762	2	146.33		2967	0.253362	Y - Y	C - C	0	32.2	1791	X											707	0.153503	Y - Y	C - C	0	37.24	1275	X
	664	5.17244	2	141.72							595	1.80901	2	149.94		481	0.478596	Y - Y	C - C	0	32.31	1798	X											708	0.149179	Y - Y	C - C	0	47.91	1288	X
	667	2.03781	2	148.63							598	1.13777	2	130.42		415	0.789851	Y - Y	C - C	0	32.36	1805	X											719	0.649955	Y - Y	C - C	0	30.72	1301	X
	670	2.88962	2	139.11							600	1.89882	2	131.6		1005	0.121817	Y - Y	C - C	0	32.36	1809	X											728	0.309322	Y - Y	C - C	0	30.03	1307	X
	671	1.54838	2	144.02							601	1.77954	2	147.94		910	0.269098	Y - Y	C - C	0	32.4	1810	X											729	0.637526	Y - Y	C - C	0	48.6	1308	X
	672	0.921731	2	133.39							603	1.49593	2	145.79		2694	0.667577	Y - Y	C - C	0	32.5	1816	X											731	1.05149	Y - Y	C - C	0	44.75	1315	X
	673	1.13833	2	124.86							608	1.22904	2	147.89		32	0.455892	Y - Y	C - C	0	32.52	1818	X											737	0.64623	Y - Y	C - C	0	39.77	1318	X
	674	1.25658	2	119.22							610	0.351431	2	107.59		2112	0.079588	Y - Y	C - C	0	32.53	1820	X											739	0.269098	Y - Y	C - C	0	32.4	1329	X
	675	1.61756	2	124.41							613	1.28641	2	148.13		1153	0.583852	Y - Y	C - C	0	32.55	1821	X											742	0.665027	Y - Y	C - C	0	43.72	1337	X
	678	1.42492	2	145.62							616	2.09337	2	146.17		2923	0.925651	Y - Y	C - C	0	32.6	1822	X											745	0.142977	Y - Y	C - C	0	35.98	1357	X
	684	2.39453	2	147.87							617	2.71528	2	139.4		316	0.292803	Y - Y	C - C	0	32.84	1827	X											748	0.26179	Y - Y	C - C	0	46.5	1360	X
	686	1.88606	2	124.92							618	2.01873	2	125.71		2507	0.7514	Y - Y	C - C	0	33.01	1831	X											751	0.269	Y - Y	C - C	0	45.63	1365	X
	687	7.32972	2	144.75							623	2.47046	2	144.06		656	0.719991	Y - Y	C - C	0	33.28	1834	X											754	0.542286	Y - Y	C - C	0	30.01	1370	X
	688	3.77637	2	141.55							628	0.540621	2	142.62		611	0.258662	Y - Y	C - C	0	33.34	1840	X											756	0.735078	Y - Y	C - C	0	37.27	1372	X
	691	1.60289	2	125.88							630	5.78254	2	145.86		377	0.865693	Y - Y	C - C	0	33.43	1841	X											758	0.387448	Y - Y	C - C	0	45.64	1390	X
	692	2.03922	2	147.15							632	1.51881	2	116.52		399	0.684412	Y - Y	C - C	0	33.45	1843	X											761	0.62657	Y - Y	C - C	0	46.5	1391	X
	693	2.80762	2	146.33							637	1.00331	2	149.58		1981	0.260018	Y - Y	C - C	0	33.47	1846	X											763	0.913674	Y - Y	C - C	0	48.84	1400	X
	697	1.80901	2	149.94							640	0.62508	2	143.73		353	0.160115	Y - Y	C - C	0	33.51	1861	X											771	0.123397	Y - Y	C - C	0	45.62	1431	X
	700	1.13777	2	130.42							642	1.23768	2	144.54		1796	0.798574	Y - Y	C - C	0	33.66	1867	X											773	0.989818	Y - Y	C - C	0	39.02	1435	X
	702	1.89882	2	131.6							643	0.501127	2	126.61		6	0.468722	Y - Y	C - C	0	33.69	1870	X											775	0.119735	Y - Y	C - C	0	49.54	1442	X
	703	1.77954	2	147.94							644	2.63443	2	123.18		691	0.338116	Y - Y	C - C	0	33.78	1881	X											780	0.199964	Y - Y	C - C	0	37.24	1452	X
	705	1.49593	2	145.79							645	1.37766	2	141.62		206	0.965207	Y - Y	C - C	0	33.89	1882	X											781	0.531104	Y - Y	C - C	0	46.3	1462	X
	710	1.22904	2	147.89							646	0.684854	2	135.93		343	0.699327	Y - Y	C - C	0	34.01	1884	X											785	0.699384	Y - Y	C - C	0	34.26	1464	X
	712	0.351431	2	107.59							648	0.665166	2	119.32		2090	0.724646	Y - Y	C - C	0	34.01	1892	X											786	0.271502	Y - Y	C - C	0	37.88	1472	X
	715	1.28641	2	148.13							649	1.39863	2	128.53		586	0.667199	Y - Y	C - C	0	34.08	1897	X											791	0.465097	Y - Y	C - C	0	35.97	1473	X
	718	2.09337	2	146.17							651	1.4096	2	135.46		2776	0.372299	Y - Y	C - C	0	34.15	1902	X											792	0.200035	Y - Y	C - C	0	48.02	1476	X
	719	2.71528	2	139.4							652	0.528484	2	139.07		1957	0.281383	Y - Y	C - C	0	34.21	1924	X											793	0.300179	Y - Y	C - C	0	47.21	1477	X
	720	2.01873	2	125.71							653	0.867833	2	137.21		553	0.082266	Y - Y	C - C	0	34.25	1933	X											796	0.432204	Y - Y	C - C	0	40.14	1479	X
	725	2.47046	2	144.06							655	0.896482	2	125.38		548	0.583046	Y - Y	C - C	0	34.26	1936	X											798	0.2239	Y - Y	C - C	0	47.24	1480	X
	730	0.540621	2	142.62							656	1.04125	2	130.73		963	0.699384	Y - Y	C - C	0	34.26	1938	X											800	0.550113	Y - Y	C - C	0	46.22	1486	X
	732	5.78254	2	145.86							657	2.076	2	127.54		2302	0.447834	Y - Y	C - C	0	34.29	1952	X											801	0.338489	Y - Y	C - C	0	36.64	1491	X
	734	1.51881	2	116.52							659	0.580844	2	113.63		1983	0.332395	Y - Y	C - C	0	34.3	1959	X											809	0.524502	Y - Y	C - C	0	35.23	1493	X
	739	1.00331	2	149.58							660	0.730017	2	126.91		409	0.918867	Y - Y	C - C	0	34.38	1967	X											810	1.25104	Y - Y	C - C	0	41.48	1494	X
	742	0.62508	2	143.73							661	1.20413	2	122.73		2167	0.111781	Y - Y	C - C	0	34.43	2	Y											816	1.26987	Y - Y	C - C	0	38.02	1505	X
	744	1.23768	2	144.54							662	3.03988	2	116.88		1761	0.673686	Y - Y	C - C	0	34.44	4	Y											817	0.121817	Y - Y	C - C	0	32.36	1511	X
	745	0.501127	2	126.61							663	1.16249	2	140.41		2571	0.125872	Y - Y	C - C	0	34.45	6	Y											818	0.479563	Y - Y	C - C	0	37.06	1513	X
	746	2.63443	2	123.18							664	0.496304	2	142.1		2560	0.459501	Y - Y	C - C	0	34.48	7	Y											821	0.24146	Y - Y	C - C	0	46.21	1515	X
	747	1.37766	2	141.62							665	0.954914	2	124.88		2510	0.081771	Y - Y	C - C	0	34.49	9	Y											826	0.07454	Y - Y	C - C	0	37.04	1516	X
	748	0.684854	2	135.93							667	0.428405	2	131.31		416	0.116916	Y - Y	C - C	0	34.55	10	Y											833	0.457326	Y - Y	C - C	0	44.6	1523	X
	750	0.665166	2	119.32							668	1.18818	2	143.47		427	0.133227	Y - Y	C - C	0	34.57	12	Y											835	1.27455	Y - Y	C - C	0	44.99	1524	X
	751	1.39863	2	128.53							672	0.832149	2	130.54		529	0.101357	Y - Y	C - C	0	34.63	19	Y											845	0.498273	Y - Y	C - C	0	38.55	1530	X
	753	1.4096	2	135.46							675	0.749105	2	126.77		516	0.420216	Y - Y	C - C	0	34.65	20	Y											847	0.596915	Y - Y	C - C	0	36.46	1534	X
	754	0.528484	2	139.07							676	1.42743	2	113.52		1349	0.103356	Y - Y	C - C	0	34.67	21	Y											855	1.11244	Y - Y	C - C	0	47.91	1548	X
	755	0.867833	2	137.21							677	0.388547	2	147.77		743	0.505054	Y - Y	C - C	0	34.73	22	Y											861	0.389896	Y - Y	C - C	0	42.12	1553	X
	757	0.896482	2	125.38							678	0.773473	2	126.12		757	0.10247	Y - Y	C - C	0	34.74	23	Y											868	0.261748	Y - Y	C - C	0	36.36	1555	X
	758	1.04125	2	130.73							679	0.550513	2	145.64		2003	0.202	Y - Y	C - C	0	34.74	24	Y											872	0.429045	Y - Y	C - C	0	43.68	1561	X
	759	2.076	2	127.54							680	0.510505	2	146.52		1570	0.128022	Y - Y	C - C	0	34.82	25	Y											874	0.156895	Y - Y	C - C	0	42.11	1563	X
	761	0.580844	2	113.63							681	0.640759	2	143.44		1549	0.322598	Y - Y	C - C	0	34.86	26	Y											883	0.356658	Y - Y	C - C	0	47.77	1571	X
	762	0.730017	2	126.91							682	0.601005	2	146.1		1254	0.228496	Y - Y	C - C	0	34.89	29	Y											885	0.20285	Y - Y	C - C	0	34.98	1576	X
	763	1.20413	2	122.73							2	0.308727	3	154.56		1095	0.20285	Y - Y	C - C	0	34.98	32	Y											899	0.802959	Y - Y	C - C	0	39.98	1602	X
	764	3.03988	2	116.88							15	0.66451	3	161.84		2016	0.082562	Y - Y	C - C	0	35.04	34	Y											900	0.325204	Y - Y	C - C	0	44.66	1605	X
	765	1.16249	2	140.41							16	2.19139	3	24.85		2029	0.090386	Y - Y	C - C	0	35.04	37	Y											903	0.561525	Y - Y	C - C	0	38.82	1618	X
	766	0.496304	2	142.1							17	0.413954	3	152.73		1999	0.153418	Y - Y	C - C	0	35.05	42	Y											912	0.115366	Y - Y	C - C	0	38.81	1624	X
	767	0.954914	2	124.88							21	0.973004	3	154.64		1975	0.109335	Y - Y	C - C	0	35.06	45	Y											913	1.26108	Y - Y	C - C	0	35.9	1631	X
	769	0.428405	2	131.31							23	0.388954	3	159.42		2698	0.689247	Y - Y	C - C	0	35.16	46	Y											921	0.764375	Y - Y	C - C	0	43.21	1646	X
	770	1.18818	2	143.47							31	0.249528	3	174.55		1364	0.843103	Y - Y	C - C	0	35.19	47	Y											927	0.583852	Y - Y	C - C	0	32.55	2	Y
	774	0.832149	2	130.54							34	0.407117	3	20.39		1434	0.925394	Y - Y	C - C	0	35.2	50	Y											934	0.921077	Y - Y	C - C	0	43.92	4	Y
	777	0.749105	2	126.77							36	2.14433	3	159.09		997	0.524502	Y - Y	C - C	0	35.23	51	Y											945	0.190064	Y - Y	C - C	0	38.76	6	Y
	778	1.42743	2	113.52							53	0.575602	3	154.33		825	0.727751	Y - Y	C - C	0	35.32	52	Y											946	0.160897	Y - Y	C - C	0	32.1	7	Y
	779	0.388547	2	147.77							56	1.12446	3	163.91		657	1.1823	Y - Y	C - C	0	35.35	54	Y											955	0.271362	Y - Y	C - C	0	39.66	9	Y
	780	0.773473	2	126.12							69	0.448379	3	156.88		125	0.165153	Y - Y	C - C	0	35.41	57	Y											959	0.241057	Y - Y	C - C	0	45.35	10	Y
	781	0.550513	2	145.64							73	0.922642	3	159.54		186	0.116376	Y - Y	C - C	0	35.45	59	Y											964	0.199269	Y - Y	C - C	0	32.1	12	Y
	782	0.510505	2	146.52							76	0.832236	3	151.69		181	0.129279	Y - Y	C - C	0	35.46	60	Y											968	0.926046	Y - Y	C - C	0	44.64	19	Y
	783	0.640759	2	143.44							94	1.36272	3	152.21		2801	0.095067	Y - Y	C - C	0	35.5	61	Y											976	0.13392	Y - Y	C - C	0	38.85	20	Y
	784	0.601005	2	146.1							103	0.705453	3	24.15		2913	0.102368	Y - Y	C - C	0	35.54	62	Y											978	0.297769	Y - Y	C - C	0	45.37	21	Y
	1	9.32802	3	6.79							113	0.59473	3	150.35		2843	0.432767	Y - Y	C - C	0	35.6	65	Y											980	1.05162	Y - Y	C - C	0	31.36	22	Y
	2	1.55899	3	19.9							119	0.203548	3	1.24		2491	0.399695	Y - Y	C - C	0	35.62	66	Y											988	0.450105	Y - Y	C - C	0	37.36	23	Y
	3	0.603276	3	1.8							126	0.263872	3	158.85		2532	0.188263	Y - Y	C - C	0	35.64	70	Y											989	0.08332	Y - Y	C - C	0	36.7	24	Y
	4	3.83853	3	24.04							145	0.408824	3	157.29		753	0.220569	Y - Y	C - C	0	35.66	72	Y											991	0.205535	Y - Y	C - C	0	39.23	25	Y
	5	1.79163	3	5.14							147	0.598714	3	176.95		1379	0.878568	Y - Y	C - C	0	35.69	75	Y											992	0.202097	Y - Y	C - C	0	44.56	27	Y
	6	2.47019	3	23.9							149	0.742143	3	151.86		1959	0.90311	Y - Y	C - C	0	35.74	77	Y											995	0.202333	Y - Y	C - C	0	48.19	30	Y
	7	3.87239	3	165.71							151	1.17543	3	153.23		2825	0.572734	Y - Y	C - C	0	35.77	79	Y											996	0.124464	Y - Y	C - C	0	37.98	32	Y
	8	0.856658	3	1.64							156	1.30011	3	152.63		2047	0.665841	Y - Y	C - C	0	35.78	81	Y											998	0.303638	Y - Y	C - C	0	47.18	35	Y
	9	0.864911	3	169.74							158	0.161891	3	153.43		563	0.404836	Y - Y	C - C	0	35.81	82	Y											1000	0.228496	Y - Y	C - C	0	34.89	40	Y
	10	1.23414	3	169.71							166	0.293623	3	175.78		1137	1.26108	Y - Y	C - C	0	35.9	84	Y											1001	0.293874	Y - Y	C - C	0	38.84	43	Y
	11	1.84797	3	164.07							171	0.312351	3	154.03		969	0.465097	Y - Y	C - C	0	35.97	85	Y											1009	0.140037	Y - Y	C - C	0	47.17	44	Y
	12	1.50652	3	4.68							178	0.491348	3	167.35		839	0.113194	Y - Y	C - C	0	35.98	86	Y											1010	0.699186	Y - Y	C - C	0	37.3	45	Y
	13	1.54167	3	7.73							180	0.34566	3	165.71		861	0.251591	Y - Y	C - C	0	35.98	87	Y											1011	0.148907	Y - Y	C - C	0	37.96	48	Y
	14	1.64808	3	8.4							193	0.568908	3	163.39		916	0.142977	Y - Y	C - C	0	35.98	88	Y											1014	0.308181	Y - Y	C - C	0	36.73	49	Y
	15	4.1074	3	6.46							194	0.681984	3	163.98		1693	0.824784	Y - Y	C - C	0	35.99	90	Y											1017	0.590524	Y - Y	C - C	0	47.72	50	Y
	16	1.44919	3	176.11							201	0.797526	3	151.61		1861	0.503318	Y - Y	C - C	0	35.99	91	Y											1022	0.381356	Y - Y	C - C	0	45.48	54	Y
	17	3.37215	3	20.59							203	0.700049	3	155.54		2851	1.43405	Y - Y	C - C	0	36	92	Y											1026	0.431445	Y - Y	C - C	0	36.59	56	Y
	18	1.63267	3	1.16							204	0.475692	3	3.37		568	0.634418	Y - Y	C - C	0	36.04	94	Y											1031	0.641239	Y - Y	C - C	0	36.3	57	Y
	19	1.91869	3	177.82							207	0.528366	3	153.93		466	0.758993	Y - Y	C - C	0	36.07	97	Y											1035	0.32881	Y - Y	C - C	0	37.49	60	Y
	20	4.30978	3	2.82							244	0.663538	3	169.25		1829	0.242842	Y - Y	C - C	0	36.11	98	Y											1047	0.383305	Y - Y	C - C	0	41.74	61	Y
	21	2.80376	3	5.69							246	0.525103	3	164.95		1360	0.134192	Y - Y	C - C	0	36.12	99	Y											1053	0.10105	Y - Y	C - C	0	45.52	63	Y
	22	4.49407	3	0.58							268	1.23581	3	153.16		1340	0.2474	Y - Y	C - C	0	36.14	100	Y											1055	0.528558	Y - Y	C - C	0	38.35	67	Y
	23	3.17618	3	0.57							288	3.45027	3	151.84		1520	0.648012	Y - Y	C - C	0	36.14	102	Y											1057	0.143507	Y - Y	C - C	0	41.19	69	Y
	24	1.00803	3	16.45							291	1.37887	3	150.89		1463	0.979492	Y - Y	C - C	0	36.16	104	Y											1059	0.2474	Y - Y	C - C	0	36.14	73	Y
	25	4.82935	3	169.16							297	0.245265	3	11.07		526	1.13134	Y - Y	C - C	0	36.18	106	Y											1062	0.162839	Y - Y	C - C	0	46.59	74	Y
	26	1.13523	3	168.29							299	0.846062	3	167.39		8	0.659887	Y - Y	C - C	0	36.19	107	Y											1065	0.172018	Y - Y	C - C	0	37.7	78	Y
	27	1.59872	3	173.91							310	0.298563	3	18.54		2628	0.127208	Y - Y	C - C	0	36.24	108	Y											1066	0.333944	Y - Y	C - C	0	36.6	79	Y
	28	1.84036	3	6.94							312	0.424799	3	174.7		1300	0.641239	Y - Y	C - C	0	36.3	109	Y											1067	0.103356	Y - Y	C - C	0	34.67	80	Y
	29	1.74129	3	179.14							316	3.21053	3	151.93		2932	0.155706	Y - Y	C - C	0	36.35	111	Y											1068	1.72408	Y - Y	C - C	0	43.4	82	Y
	30	5.71463	3	4.83							331	0.521197	3	19.79		1076	0.261748	Y - Y	C - C	0	36.36	112	Y											1069	0.137693	Y - Y	C - C	0	41.2	83	Y
	31	1.77317	3	7.45							343	0.274787	3	8.37		2937	0.315773	Y - Y	C - C	0	36.36	114	Y											1073	0.162124	Y - Y	C - C	0	37.28	84	Y
	32	2.6873	3	5.64							356	0.518324	3	152.65		2122	0.456743	Y - Y	C - C	0	36.44	115	Y											1075	0.701851	Y - Y	C - C	0	43.63	88	Y
	33	3.76038	3	0.31							361	0.142125	3	153.6		1047	0.596915	Y - Y	C - C	0	36.46	118	Y											1076	0.134192	Y - Y	C - C	0	36.12	89	Y
	34	2.25093	3	0.37							384	2.48161	3	150.28		2095	0.179803	Y - Y	C - C	0	36.52	119	Y											1078	0.104005	Y - Y	C - C	0	37.42	90	Y
	35	4.37969	3	172.6							387	2.06527	3	151.27		2063	0.158423	Y - Y	C - C	0	36.53	120	Y											1080	0.843103	Y - Y	C - C	0	35.19	91	Y
	36	0.745593	3	176.25							396	0.12315	3	14.92		1836	0.919224	Y - Y	C - C	0	36.55	122	Y											1082	0.123678	Y - Y	C - C	0	45.49	93	Y
	37	0.889515	3	3.01							411	1.73381	3	18.7		1293	0.431445	Y - Y	C - C	0	36.59	125	Y											1086	0.427863	Y - Y	C - C	0	48.11	94	Y
	38	8.98306	3	165.91							432	0.095518	3	28.17		1376	0.233163	Y - Y	C - C	0	36.59	126	Y											1089	0.087389	Y - Y	C - C	0	48.15	96	Y
	39	1.83068	3	158.59							441	0.740619	3	171.43		491	0.298563	Y - Y	C - C	0	36.6	127	Y											1091	0.233163	Y - Y	C - C	0	36.59	97	Y
	40	4.07443	3	152.36							454	1.18537	3	163.37		1348	0.333944	Y - Y	C - C	0	36.6	128	Y											1092	0.878568	Y - Y	C - C	0	35.69	100	Y
	41	2.05241	3	2.32							464	0.810888	3	151.92		2603	0.115361	Y - Y	C - C	0	36.61	129	Y											1094	0.552367	Y - Y	C - C	0	43.13	101	Y
	42	1.46356	3	166.17							472	0.356873	3	24.55		988	0.338489	Y - Y	C - C	0	36.64	131	Y											1095	0.292273	Y - Y	C - C	0	44.24	104	Y
	43	2.72475	3	178.63							514	0.700678	3	173.75		1236	0.08332	Y - Y	C - C	0	36.7	134	Y											1097	0.246922	Y - Y	C - C	0	45	107	Y
	44	1.22094	3	178.91							542	0.873051	3	161.23		671	0.188861	Y - Y	C - C	0	36.71	135	Y											1105	0.102702	Y - Y	C - C	0	48.32	108	Y
	45	1.60757	3	163.6							564	0.306656	3	13.41		497	0.27483	Y - Y	C - C	0	36.72	136	Y											1114	0.44678	Y - Y	C - C	0	41.99	109	Y
	46	2.95493	3	0.55							579	0.240608	3	154.63		1275	0.308181	Y - Y	C - C	0	36.73	137	Y											1116	0.529225	Y - Y	C - C	0	41.98	111	Y
	47	1.03999	3	11.48							581	0.330925	3	152.64		2254	0.596863	Y - Y	C - C	0	36.75	138	Y											1123	0.447363	Y - Y	C - C	0	37.77	113	Y
	48	0.749452	3	27.01							588	0.47484	3	152.78		1536	0.20326	Y - Y	C - C	0	36.78	139	Y											1125	0.821957	Y - Y	C - C	0	46.2	114	Y
	49	0.511533	3	6.73							596	1.08665	3	161.6		1552	0.13796	Y - Y	C - C	0	36.78	145	Y											1127	0.111524	Y - Y	C - C	0	41.98	115	Y
	50	0.943956	3	177.39							597	0.559566	3	159.75		1655	0.679581	Y - Y	C - C	0	36.78	146	Y											1131	0.524669	Y - Y	C - C	0	42.03	117	Y
	51	0.217397	3	4.91							605	0.24716	3	151.35		793	0.596061	Y - Y	C - C	0	36.79	149	Y											1133	0.151817	Y - Y	C - C	0	45.24	120	Y
	52	0.374764	3	0.34							606	0.401044	3	2.09		2188	0.23022	Y - Y	C - C	0	36.86	150	Y											1135	0.443901	Y - Y	C - C	0	42.08	121	Y
	53	1.36339	3	1.34							609	0.229951	3	14.33		2142	0.18578	Y - Y	C - C	0	36.88	151	Y											1136	0.325748	Y - Y	C - C	0	46.99	122	Y
	54	4.18889	3	25.16							619	0.370704	3	20.78		17	0.268281	Y - Y	C - C	0	36.99	153	Y											1140	2.01929	Y - Y	C - C	0	39.89	123	Y
	55	1.11244	3	8.73							625	1.6302	3	162.9		1464	0.689571	Y - Y	C - C	0	37.01	154	Y											1142	1.10085	Y - Y	C - C	0	49.85	129	Y
	59	1.1539	3	150.77							629	0.349809	3	154.34		2113	0.636643	Y - Y	C - C	0	37.01	155	Y											1149	0.139404	Y - Y	C - C	0	43.75	132	Y
	68	0.877489	3	4.68							634	1.20641	3	154.03		692	0.257121	Y - Y	C - C	0	37.02	156	Y											1154	0.815754	Y - Y	C - C	0	48.95	133	Y
	69	1.80077	3	4.32							635	0.653658	3	2.64		1018	0.07454	Y - Y	C - C	0	37.04	157	Y											1159	1.20028	Y - Y	C - C	0	35.56	134	Y
	70	3.25387	3	155.22							636	2.42079	3	151.6		2234	0.340478	Y - Y	C - C	0	37.04	158	Y											1166	0.201751	Y - Y	C - C	0	44.34	136	Y
	71	0.89477	3	23.33							641	0.662529	3	153.95		713	0.206401	Y - Y	C - C	0	37.06	161	Y											1177	0.878694	Y - Y	C - C	0	37.06	137	Y
	72	1.44034	3	8.15							658	0.400146	3	28.92		482	1.30442	Y - Y	C - C	0	37.07	162	Y											1181	0.864996	Y - Y	C - C	0	45	138	Y
	73	0.996153	3	4.12							670	0.284562	3	157.5		2001	0.174621	Y - Y	C - C	0	37.09	163	Y											1183	0.105809	Y - Y	C - C	0	31.83	139	Y
	75	1.16682	3	161.75												421	0.293762	Y - Y	C - C	0	37.1	165	Y											1191	0.649311	Y - Y	C - C	0	48.99	140	Y
	76	1.65498	3	3.74												851	1.06498	Y - Y	C - C	0	37.1	166	Y											1193	0.969192	Y - Y	C - C	0	37.12	144	Y
	77	3.16755	3	27.36												736	0.231642	Y - Y	C - C	0	37.12	167	Y											1198	0.588653	Y - Y	C - C	0	39.61	145	Y
	79	7.72552	3	177.46												36	0.693342	Y - Y	C - C	0	37.14	169	Y											1203	0.847763	Y - Y	C - C	0	44.12	147	Y
	80	3.20318	3	176.84												113	0.115762	Y - Y	C - C	0	37.21	170	Y											1206	0.184218	Y - Y	C - C	0	49.56	148	Y
	81	1.41019	3	174.61												2858	0.096562	Y - Y	C - C	0	37.21	171	Y											1207	1.41798	Y - Y	C - C	0	37.38	149	Y
	83	0.653658	3	2.64												1496	0.189124	Y - Y	C - C	0	37.22	172	Y											1210	0.432221	Y - Y	C - C	0	44.25	151	Y
	84	1.14482	3	171.04												871	0.153503	Y - Y	C - C	0	37.24	176	Y											1212	0.322598	Y - Y	C - C	0	34.86	153	Y
	85	1.45406	3	171.9												957	0.199964	Y - Y	C - C	0	37.24	177	Y											1215	0.34122	Y - Y	C - C	0	36.78	155	Y
	86	0.635401	3	177.1												933	0.735078	Y - Y	C - C	0	37.27	178	Y											1221	0.66998	Y - Y	C - C	0	43.71	159	Y
	88	2.14287	3	155.97												2533	0.155704	Y - Y	C - C	0	37.27	179	Y											1222	0.932853	Y - Y	C - C	0	44.73	160	Y
	89	1.23658	3	2.41												387	0.690171	Y - Y	C - C	0	37.28	181	Y											1225	0.128022	Y - Y	C - C	0	34.82	161	Y
	90	2.64654	3	152.73												580	0.551954	Y - Y	C - C	0	37.28	183	Y											1228	0.996282	Y - Y	C - C	0	48.88	162	Y
	91	1.66786	3	4.31												1357	0.162124	Y - Y	C - C	0	37.28	185	Y											1233	0.156564	Y - Y	C - C	0	44.33	165	Y
	92	1.54314	3	2.83												1591	1.26507	Y - Y	C - C	0	37.29	186	Y											1236	0.313581	Y - Y	C - C	0	46.59	166	Y
	93	0.899687	3	168.38												1269	0.699186	Y - Y	C - C	0	37.3	188	Y											1240	0.118472	Y - Y	C - C	0	46.33	167	Y
	94	0.384419	3	11.56												2509	0.152484	Y - Y	C - C	0	37.3	189	Y											1250	0.14289	Y - Y	C - C	0	46.59	169	Y
	95	0.457752	3	1.5												477	0.157185	Y - Y	C - C	0	37.32	190	Y											1255	1.29743	Y - Y	C - C	0	47.68	170	Y
	96	0.482716	3	169.72												60	0.119864	Y - Y	C - C	0	37.34	191	Y											1261	0.375645	Y - Y	C - C	0	38.67	171	Y
	98	1.19987	3	164.51												455	0.581468	Y - Y	C - C	0	37.35	194	Y											1273	0.831196	Y - Y	C - C	0	37.35	174	Y
	99	1.72795	3	3.31												1634	0.831196	Y - Y	C - C	0	37.35	195	Y											1282	0.241757	Y - Y	C - C	0	38.65	175	Y
	100	1.65394	3	162.62												1235	0.450105	Y - Y	C - C	0	37.36	197	Y											1286	0.679581	Y - Y	C - C	0	36.78	176	Y
	101	0.685201	3	153.95												473	0.631664	Y - Y	C - C	0	37.37	198	Y											1288	0.291545	Y - Y	C - C	0	45.35	177	Y
	102	1.78131	3	154.35												2873	0.47959	Y - Y	C - C	0	37.39	199	Y											1289	0.527082	Y - Y	C - C	0	45.93	178	Y
	104	0.308727	3	154.56												1894	0.310033	Y - Y	C - C	0	37.4	201	Y											1295	1.55784	Y - Y	C - C	0	33.68	179	Y
	117	0.66451	3	161.84												640	0.165427	Y - Y	C - C	0	37.41	202	Y											1297	0.533013	Y - Y	C - C	0	49.17	180	Y
	118	2.19139	3	24.85												660	0.300753	Y - Y	C - C	0	37.41	203	Y											1298	0.54547	Y - Y	C - C	0	39.02	181	Y
	119	0.413954	3	152.73												1912	0.107645	Y - Y	C - C	0	37.41	204	Y											1299	0.548576	Y - Y	C - C	0	46.6	184	Y
	123	0.973004	3	154.64												1362	0.104005	Y - Y	C - C	0	37.42	205	Y											1303	0.179621	Y - Y	C - C	0	45.77	185	Y
	125	0.388954	3	159.42												1713	0.107486	Y - Y	C - C	0	37.48	208	Y											1311	0.781443	Y - Y	C - C	0	43.63	186	Y
	133	0.249528	3	174.55												1305	0.32881	Y - Y	C - C	0	37.49	209	Y											1316	0.824784	Y - Y	C - C	0	35.99	187	Y
	136	0.407117	3	20.39												546	0.541742	Y - Y	C - C	0	37.57	211	Y											1318	1.84919	Y - Y	C - C	0	48.5	189	Y
	138	2.14433	3	159.09												493	0.348914	Y - Y	C - C	0	37.66	212	Y											1319	0.123259	Y - Y	C - C	0	45.76	190	Y
	155	0.575602	3	154.33												2715	0.187279	Y - Y	C - C	0	37.69	213	Y											1322	0.178707	Y - Y	C - C	0	39.35	194	Y
	158	1.12446	3	163.91												1347	0.172018	Y - Y	C - C	0	37.7	214	Y											1325	0.092575	Y - Y	C - C	0	30.94	196	Y
	171	0.448379	3	156.88												1413	0.447363	Y - Y	C - C	0	37.77	215	Y											1333	0.107486	Y - Y	C - C	0	37.48	198	Y
	175	0.922642	3	159.54												2355	0.336887	Y - Y	C - C	0	37.83	216	Y											1336	0.187246	Y - Y	C - C	0	46.62	199	Y
	178	0.832236	3	151.69												2864	0.234613	Y - Y	C - C	0	37.83	221	Y											1341	0.478748	Y - Y	C - C	0	46.32	200	Y
	196	1.36272	3	152.21												1554	0.841253	Y - Y	C - C	0	37.85	222	Y											1360	0.465947	Y - Y	C - C	0	45.32	201	Y
	205	0.705453	3	24.15												1222	0.603911	Y - Y	C - C	0	37.87	224	Y											1366	0.207684	Y - Y	C - C	0	46.56	202	Y
	215	0.59473	3	150.35												2054	0.144162	Y - Y	C - C	0	37.87	226	Y											1375	0.673686	Y - Y	C - C	0	34.44	205	Y
	221	0.203548	3	1.24												2132	0.092854	Y - Y	C - C	0	37.87	227	Y											1379	0.288585	Y - Y	C - C	0	49.95	210	Y
	228	0.263872	3	158.85												964	0.271502	Y - Y	C - C	0	37.88	228	Y											1383	1.71029	Y - Y	C - C	0	41.82	213	Y
	247	0.408824	3	157.29												24	0.596851	Y - Y	C - C	0	37.91	230	Y											1386	0.194949	Y - Y	C - C	0	42.82	214	Y
	249	0.598714	3	176.95												788	0.18099	Y - Y	C - C	0	37.91	231	Y											1388	0.167781	Y - Y	C - C	0	49.93	215	Y
	251	0.742143	3	151.86												1270	0.148907	Y - Y	C - C	0	37.96	233	Y											1393	0.283128	Y - Y	C - C	0	31.11	217	Y
	253	1.17543	3	153.23												1247	0.124464	Y - Y	C - C	0	37.98	237	Y											1396	0.224232	Y - Y	C - C	0	48.92	219	Y
	258	1.30011	3	152.63												2772	1.22648	Y - Y	C - C	0	37.98	239	Y											1418	0.242842	Y - Y	C - C	0	36.11	220	Y
	260	0.161891	3	153.43												1004	1.26987	Y - Y	C - C	0	38.02	240	Y											1426	1.06804	Y - Y	C - C	0	42.99	221	Y
	268	0.293623	3	175.78												2265	0.748435	Y - Y	C - C	0	38.11	241	Y											1427	0.356385	Y - Y	C - C	0	41.64	222	Y
	273	0.312351	3	154.03												428	0.285372	Y - Y	C - C	0	38.15	242	Y											1435	0.934815	Y - Y	C - C	0	39.05	223	Y
	280	0.491348	3	167.35												407	0.342346	Y - Y	C - C	0	38.16	244	Y											1436	0.371096	Y - Y	C - C	0	30.07	224	Y
	282	0.34566	3	165.71												435	0.121211	Y - Y	C - C	0	38.17	246	Y											1439	0.503318	Y - Y	C - C	0	35.99	225	Y
	295	0.568908	3	163.39												216	0.122615	Y - Y	C - C	0	38.24	248	Y											1444	0.419879	Y - Y	C - C	0	38.35	228	Y
	296	0.681984	3	163.98												1869	0.419879	Y - Y	C - C	0	38.35	249	Y											1446	0.363338	Y - Y	C - C	0	38.58	229	Y
	303	0.797526	3	151.61												139	0.997545	Y - Y	C - C	0	38.41	250	Y											1447	0.948871	Y - Y	C - C	0	45.59	230	Y
	305	0.700049	3	155.54												457	0.347071	Y - Y	C - C	0	38.43	251	Y											1448	0.469964	Y - Y	C - C	0	47.86	231	Y
	306	0.475692	3	3.37												1044	0.498273	Y - Y	C - C	0	38.55	252	Y											1449	0.784668	Y - Y	C - C	0	39.92	233	Y
	309	0.528366	3	153.93												1871	0.363338	Y - Y	C - C	0	38.58	254	Y											1457	0.091968	Y - Y	C - C	0	47.86	234	Y
	346	0.663538	3	169.25												2156	0.693303	Y - Y	C - C	0	38.58	255	Y											1459	0.096281	Y - Y	C - C	0	46.73	235	Y
	348	0.525103	3	164.95												379	0.237856	Y - Y	C - C	0	38.63	259	Y											1470	0.602605	Y - Y	C - C	0	47.54	237	Y
	370	1.23581	3	153.16												471	0.138026	Y - Y	C - C	0	38.65	260	Y											1477	0.087506	Y - Y	C - C	0	48.66	238	Y
	390	3.45027	3	151.84												507	0.438833	Y - Y	C - C	0	38.65	262	Y											1479	0.107645	Y - Y	C - C	0	37.41	241	Y
	393	1.37887	3	150.89												1649	0.241757	Y - Y	C - C	0	38.65	263	Y											1480	2.04527	Y - Y	C - C	0	42.45	245	Y
	399	0.245265	3	11.07												284	0.740079	Y - Y	C - C	0	38.66	265	Y											1482	0.199561	Y - Y	C - C	0	46.69	246	Y
	401	0.846062	3	167.39												2497	0.914788	Y - Y	C - C	0	38.66	266	Y											1483	0.192285	Y - Y	C - C	0	41.42	248	Y
	412	0.298563	3	18.54												2761	0.457464	Y - Y	C - C	0	38.66	267	Y											1484	0.348331	Y - Y	C - C	0	39.86	250	Y
	414	0.424799	3	174.7												1615	0.375645	Y - Y	C - C	0	38.67	268	Y											1491	0.088459	Y - Y	C - C	0	42.71	251	Y
	418	3.21053	3	151.93												1501	0.101591	Y - Y	C - C	0	38.69	270	Y											1497	0.687865	Y - Y	C - C	0	40.66	253	Y
	433	0.521197	3	19.79												2934	0.517576	Y - Y	C - C	0	38.74	272	Y											1503	0.563759	Y - Y	C - C	0	38.75	254	Y
	445	0.274787	3	8.37												1943	0.563759	Y - Y	C - C	0	38.75	275	Y											1505	0.675721	Y - Y	C - C	0	38.86	257	Y
	458	0.518324	3	152.65												1180	0.190064	Y - Y	C - C	0	38.76	276	Y											1509	0.317744	Y - Y	C - C	0	41.9	258	Y
	463	0.142125	3	153.6												1136	0.115366	Y - Y	C - C	0	38.81	278	Y											1514	0.281383	Y - Y	C - C	0	34.21	259	Y
	486	2.48161	3	150.28												1122	0.561525	Y - Y	C - C	0	38.82	279	Y											1516	0.90311	Y - Y	C - C	0	35.74	260	Y
	489	2.06527	3	151.27												1256	0.293874	Y - Y	C - C	0	38.84	280	Y											1520	0.418478	Y - Y	C - C	0	47.05	261	Y
	498	0.12315	3	14.92												1221	0.13392	Y - Y	C - C	0	38.85	281	Y											1527	0.109335	Y - Y	C - C	0	35.06	262	Y
	513	1.73381	3	18.7												1945	0.675721	Y - Y	C - C	0	38.86	283	Y											1529	1.98906	Y - Y	C - C	0	37.13	263	Y
	534	0.095518	3	28.17												950	0.597579	Y - Y	C - C	0	39.02	284	Y											1530	0.370383	Y - Y	C - C	0	45	264	Y
	543	0.740619	3	171.43												1668	0.54547	Y - Y	C - C	0	39.02	286	Y											1533	0.260018	Y - Y	C - C	0	33.47	265	Y
	556	1.18537	3	163.37												901	0.392239	Y - Y	C - C	0	39.03	287	Y											1539	0.869977	Y - Y	C - C	0	46.28	267	Y
	566	0.810888	3	151.92												1851	0.934815	Y - Y	C - C	0	39.05	288	Y											1544	0.153418	Y - Y	C - C	0	35.05	269	Y
	574	0.356873	3	24.55												1427	0.32118	Y - Y	C - C	0	39.09	289	Y											1546	0.174621	Y - Y	C - C	0	37.09	270	Y
	616	0.700678	3	173.75												1242	0.205535	Y - Y	C - C	0	39.23	290	Y											1548	0.202	Y - Y	C - C	0	34.74	271	Y
	644	0.873051	3	161.23												2433	0.163484	Y - Y	C - C	0	39.3	291	Y											1549	0.093997	Y - Y	C - C	0	43.75	272	Y
	666	0.306656	3	13.41												2585	0.358567	Y - Y	C - C	0	39.32	293	Y											1554	0.617343	Y - Y	C - C	0	44.36	273	Y
	681	0.240608	3	154.63												1701	0.178707	Y - Y	C - C	0	39.35	294	Y											1556	0.082562	Y - Y	C - C	0	35.04	274	Y
	683	0.330925	3	152.64												1639	0.722131	Y - Y	C - C	0	39.41	295	Y											1560	0.214841	Y - Y	C - C	0	46.68	275	Y
	690	0.47484	3	152.78												2610	0.469338	Y - Y	C - C	0	39.51	296	Y											1562	0.521563	Y - Y	C - C	0	42.87	278	Y
	698	1.08665	3	161.6												176	0.507728	Y - Y	C - C	0	39.52	297	Y											1565	0.090386	Y - Y	C - C	0	35.04	279	Y
	699	0.559566	3	159.75												1526	0.588653	Y - Y	C - C	0	39.61	298	Y											1569	1.26273	Y - Y	C - C	0	46.77	281	Y
	707	0.24716	3	151.35												1191	0.271362	Y - Y	C - C	0	39.66	299	Y											1570	0.140398	Y - Y	C - C	0	47.25	283	Y
	708	0.401044	3	2.09												1251	0.527731	Y - Y	C - C	0	39.67	300	Y											1578	0.193972	Y - Y	C - C	0	44.35	284	Y
	711	0.229951	3	14.33												2815	0.482725	Y - Y	C - C	0	39.74	301	Y											1579	0.139078	Y - Y	C - C	0	46.69	285	Y
	721	0.370704	3	20.78												2215	0.552705	Y - Y	C - C	0	39.76	302	Y											1581	0.144162	Y - Y	C - C	0	37.87	286	Y
	727	1.6302	3	162.9												908	0.64623	Y - Y	C - C	0	39.77	304	Y											1582	0.286572	Y - Y	C - C	0	42.23	287	Y
	731	0.349809	3	154.34												2282	0.462181	Y - Y	C - C	0	39.77	305	Y											1586	0.607496	Y - Y	C - C	0	48.5	288	Y
	736	1.20641	3	154.03												156	0.127025	Y - Y	C - C	0	39.79	306	Y											1588	0.158423	Y - Y	C - C	0	36.53	290	Y
	737	0.653658	3	2.64												154	0.377094	Y - Y	C - C	0	39.8	307	Y											1604	0.15475	Y - Y	C - C	0	40.26	291	Y
	738	2.42079	3	151.6												622	0.433968	Y - Y	C - C	0	39.8	308	Y											1607	0.724646	Y - Y	C - C	0	34.01	293	Y
	743	0.662529	3	153.95												2660	0.441799	Y - Y	C - C	0	39.8	309	Y											1608	0.701798	Y - Y	C - C	0	43.02	294	Y
	760	0.400146	3	28.92												868	0.114811	Y - Y	C - C	0	39.81	310	Y											1610	0.179803	Y - Y	C - C	0	36.52	295	Y
	772	0.284562	3	157.5												2595	0.557934	Y - Y	C - C	0	39.81	311	Y											1616	0.160294	Y - Y	C - C	0	40.22	298	Y
																1918	0.348331	Y - Y	C - C	0	39.86	312	Y											1618	0.507966	Y - Y	C - C	0	49.25	300	Y
																2216	0.172799	Y - Y	C - C	0	39.88	313	Y											1623	0.636643	Y - Y	C - C	0	37.01	301	Y
																2240	0.209289	Y - Y	C - C	0	39.88	314	Y											1636	0.092854	Y - Y	C - C	0	37.87	302	Y
																1876	0.784668	Y - Y	C - C	0	39.92	316	Y											1637	0.578076	Y - Y	C - C	0	42.45	303	Y
																2504	0.798968	Y - Y	C - C	0	39.93	317	Y											1643	0.117187	Y - Y	C - C	0	40.88	305	Y
																1117	0.802959	Y - Y	C - C	0	39.98	318	Y											1645	0.18578	Y - Y	C - C	0	36.88	308	Y
																2230	0.600594	Y - Y	C - C	0	39.98	319	Y											1647	0.589134	Y - Y	C - C	0	42.25	309	Y
																764	0.143147	Y - Y	C - C	0	40.1	320	Y											1650	0.235683	Y - Y	C - C	0	44.64	310	Y
																2539	0.831736	Y - Y	C - C	0	40.12	321	Y											1651	0.325711	Y - Y	C - C	0	47.15	311	Y
																983	0.432204	Y - Y	C - C	0	40.14	323	Y											1654	0.37443	Y - Y	C - C	0	40.23	312	Y
																98	0.467498	Y - Y	C - C	0	40.18	324	Y											1656	0.94533	Y - Y	C - C	0	44.64	313	Y
																2195	0.57933	Y - Y	C - C	0	40.18	325	Y											1657	0.693303	Y - Y	C - C	0	38.58	314	Y
																2104	0.160294	Y - Y	C - C	0	40.22	326	Y											1666	0.111781	Y - Y	C - C	0	34.43	315	Y
																2153	0.37443	Y - Y	C - C	0	40.23	327	Y											1670	0.141657	Y - Y	C - C	0	40.82	316	Y
																1289	0.316888	Y - Y	C - C	0	40.24	328	Y											1674	0.130956	Y - Y	C - C	0	45	317	Y
																2084	0.15475	Y - Y	C - C	0	40.26	329	Y											1675	0.940067	Y - Y	C - C	0	44.06	318	Y
																2276	0.171128	Y - Y	C - C	0	40.31	330	Y											1680	0.23022	Y - Y	C - C	0	36.86	320	Y
																2191	0.05406	Y - Y	C - C	0	40.35	331	Y											1685	0.57933	Y - Y	C - C	0	40.18	321	Y
																2620	0.364348	Y - Y	C - C	0	40.39	332	Y											1686	0.314531	Y - Y	C - C	0	47.15	322	Y
																2564	0.144574	Y - Y	C - C	0	40.4	333	Y											1695	0.552705	Y - Y	C - C	0	39.76	323	Y
																2653	0.348382	Y - Y	C - C	0	40.4	334	Y											1696	0.172799	Y - Y	C - C	0	39.88	325	Y
																804	0.566572	Y - Y	C - C	0	40.61	335	Y											1704	0.600594	Y - Y	C - C	0	39.98	328	Y
																2786	0.18297	Y - Y	C - C	0	40.61	336	Y											1708	0.394538	Y - Y	C - C	0	37.49	329	Y
																2333	0.378826	Y - Y	C - C	0	40.65	338	Y											1712	1.11124	Y - Y	C - C	0	44.73	332	Y
																2548	0.247778	Y - Y	C - C	0	40.65	340	Y											1714	0.209289	Y - Y	C - C	0	39.88	333	Y
																1934	0.687865	Y - Y	C - C	0	40.66	341	Y											1721	0.491123	Y - Y	C - C	0	47.76	334	Y
																2357	0.110201	Y - Y	C - C	0	40.66	342	Y											1725	0.596863	Y - Y	C - C	0	36.75	336	Y
																700	0.322706	Y - Y	C - C	0	40.71	344	Y											1728	3.39734	Y - Y	C - C	0	37.81	337	Y
																821	0.195477	Y - Y	C - C	0	40.79	345	Y											1730	0.129639	Y - Y	C - C	0	43.84	338	Y
																2552	0.134357	Y - Y	C - C	0	40.8	346	Y											1733	0.748435	Y - Y	C - C	0	38.11	339	Y
																2866	0.62613	Y - Y	C - C	0	40.8	348	Y											1742	0.171128	Y - Y	C - C	0	40.31	343	Y
																106	0.357332	Y - Y	C - C	0	40.82	349	Y											1754	0.295237	Y - Y	C - C	0	45.67	344	Y
																2173	0.141657	Y - Y	C - C	0	40.82	350	Y											1761	0.447834	Y - Y	C - C	0	34.29	346	Y
																2616	0.429862	Y - Y	C - C	0	40.82	351	Y											1762	0.641178	Y - Y	C - C	0	45.8	347	Y
																2500	0.727723	Y - Y	C - C	0	40.83	352	Y											1773	0.125957	Y - Y	C - C	0	43.94	348	Y
																2140	0.117187	Y - Y	C - C	0	40.88	353	Y											1774	0.340619	Y - Y	C - C	0	40.83	350	Y
																2804	0.649736	Y - Y	C - C	0	40.91	355	Y											1781	0.471871	Y - Y	C - C	0	44.49	352	Y
																110	0.117948	Y - Y	C - C	0	41.01	357	Y											1783	0.556018	Y - Y	C - C	0	41.75	353	Y
																2633	0.426141	Y - Y	C - C	0	41.16	358	Y											1784	1.46393	Y - Y	C - C	0	47.37	355	Y
																72	0.694617	Y - Y	C - C	0	41.19	359	Y											1789	0.378826	Y - Y	C - C	0	40.65	357	Y
																1334	0.143507	Y - Y	C - C	0	41.19	360	Y											1792	0.735908	Y - Y	C - C	0	48.29	359	Y
																1353	0.137693	Y - Y	C - C	0	41.2	361	Y											1797	0.149656	Y - Y	C - C	0	41.72	360	Y
																1778	0.331464	Y - Y	C - C	0	41.33	362	Y											1801	0.336887	Y - Y	C - C	0	37.83	363	Y
																2364	0.846199	Y - Y	C - C	0	41.35	363	Y											1803	0.110201	Y - Y	C - C	0	40.66	364	Y
																555	1.0517	Y - Y	C - C	0	41.37	364	Y											1807	1.23365	Y - Y	C - C	0	43.57	365	Y
																2391	0.172952	Y - Y	C - C	0	41.37	365	Y											1809	0.554384	Y - Y	C - C	0	30.26	366	Y
																2361	0.397335	Y - Y	C - C	0	41.39	366	Y											1810	0.846199	Y - Y	C - C	0	41.35	367	Y
																1917	0.192285	Y - Y	C - C	0	41.42	367	Y											1818	0.088493	Y - Y	C - C	0	30.94	368	Y
																758	0.597284	Y - Y	C - C	0	41.44	368	Y											1825	0.348984	Y - Y	C - C	0	43.22	369	Y
																808	1.21921	Y - Y	C - C	0	41.45	369	Y											1833	0.172952	Y - Y	C - C	0	41.37	371	Y
																998	1.25104	Y - Y	C - C	0	41.48	371	Y											1836	0.091237	Y - Y	C - C	0	31.01	372	Y
																2458	0.518198	Y - Y	C - C	0	41.5	373	Y											1837	0.330806	Y - Y	C - C	0	31.82	374	Y
																2953	0.551083	Y - Y	C - C	0	41.51	374	Y											1843	0.771332	Y - Y	C - C	0	44.78	375	Y
																2133	0.390256	Y - Y	C - C	0	41.54	375	Y											1847	0.432319	Y - Y	C - C	0	46.73	377	Y
																2618	0.078486	Y - Y	C - C	0	41.59	376	Y											1856	0.602692	Y - Y	C - C	0	49.5	378	Y
																2526	0.748961	Y - Y	C - C	0	41.6	379	Y											1861	0.163484	Y - Y	C - C	0	39.3	380	Y
																866	0.223475	Y - Y	C - C	0	41.64	380	Y											1863	0.351123	Y - Y	C - C	0	44.09	382	Y
																1843	0.356385	Y - Y	C - C	0	41.64	381	Y											1865	0.544364	Y - Y	C - C	0	41.74	383	Y
																2573	0.286731	Y - Y	C - C	0	41.64	383	Y											1869	0.226336	Y - Y	C - C	0	48.87	384	Y
																1317	0.383305	Y - Y	C - C	0	41.74	384	Y											1874	1.36401	Y - Y	C - C	0	45.17	385	Y
																2437	0.544364	Y - Y	C - C	0	41.74	385	Y											1879	0.11697	Y - Y	C - C	0	44.1	386	Y
																2327	0.556018	Y - Y	C - C	0	41.75	386	Y											1880	0.518198	Y - Y	C - C	0	41.5	387	Y
																773	0.065648	Y - Y	C - C	0	41.85	387	Y											1888	0.189526	Y - Y	C - C	0	42.16	388	Y
																1907	0.231284	Y - Y	C - C	0	41.88	390	Y											1902	0.399695	Y - Y	C - C	0	35.62	390	Y
																1950	0.317744	Y - Y	C - C	0	41.9	391	Y											1906	0.789914	Y - Y	C - C	0	43.36	391	Y
																2006	0.386357	Y - Y	C - C	0	41.92	393	Y											1909	0.727723	Y - Y	C - C	0	40.83	393	Y
																767	0.08724	Y - Y	C - C	0	41.93	394	Y											1911	0.411982	Y - Y	C - C	0	38.54	394	Y
																1405	0.529225	Y - Y	C - C	0	41.98	395	Y											1915	0.7514	Y - Y	C - C	0	33.01	395	Y
																1419	0.111524	Y - Y	C - C	0	41.98	397	Y											1917	0.081771	Y - Y	C - C	0	34.49	396	Y
																1403	0.44678	Y - Y	C - C	0	41.99	399	Y											1933	0.748961	Y - Y	C - C	0	41.6	398	Y
																1423	0.524669	Y - Y	C - C	0	42.03	401	Y											1935	0.471688	Y - Y	C - C	0	44.75	399	Y
																1430	0.443901	Y - Y	C - C	0	42.08	402	Y											1937	0.188263	Y - Y	C - C	0	35.64	401	Y
																1084	0.156895	Y - Y	C - C	0	42.11	403	Y											1938	1.22298	Y - Y	C - C	0	38.32	403	Y
																1066	0.389896	Y - Y	C - C	0	42.12	405	Y											1944	0.831736	Y - Y	C - C	0	40.12	404	Y
																2472	0.189526	Y - Y	C - C	0	42.16	406	Y											1946	0.471512	Y - Y	C - C	0	44.57	405	Y
																1799	0.297974	Y - Y	C - C	0	42.21	408	Y											1950	1.78102	Y - Y	C - C	0	47.02	406	Y
																2055	0.286572	Y - Y	C - C	0	42.23	409	Y											1951	0.135705	Y - Y	C - C	0	48.29	407	Y
																1200	0.196945	Y - Y	C - C	0	42.24	410	Y											1952	0.247778	Y - Y	C - C	0	40.65	408	Y
																1174	0.280336	Y - Y	C - C	0	42.25	413	Y											1954	0.134357	Y - Y	C - C	0	40.8	409	Y
																2144	0.589134	Y - Y	C - C	0	42.25	414	Y											1956	0.912674	Y - Y	C - C	0	40.91	410	Y
																21	0.286189	Y - Y	C - C	0	42.35	415	Y											1958	0.168508	Y - Y	C - C	0	44.59	411	Y
																2868	0.138948	Y - Y	C - C	0	42.4	416	Y											1962	0.144574	Y - Y	C - C	0	40.4	412	Y
																2860	0.097114	Y - Y	C - C	0	42.41	417	Y											1964	0.816778	Y - Y	C - C	0	46.83	414	Y
																630	0.106304	Y - Y	C - C	0	42.56	418	Y											1969	0.585374	Y - Y	C - C	0	34.47	415	Y
																663	0.421818	Y - Y	C - C	0	42.56	419	Y											1971	0.286731	Y - Y	C - C	0	41.64	416	Y
																2725	0.573231	Y - Y	C - C	0	42.6	420	Y											1974	0.365018	Y - Y	C - C	0	45.42	418	Y
																2911	0.569405	Y - Y	C - C	0	42.68	421	Y											1980	0.70354	Y - Y	C - C	0	49.27	419	Y
																1913	0.754095	Y - Y	C - C	0	42.71	422	Y											1991	0.115361	Y - Y	C - C	0	36.61	421	Y
																1927	0.088459	Y - Y	C - C	0	42.71	423	Y											1995	0.121626	Y - Y	C - C	0	45.47	422	Y
																606	0.432511	Y - Y	C - C	0	42.77	424	Y											1997	0.348998	Y - Y	C - C	0	42.85	424	Y
																2657	0.241445	Y - Y	C - C	0	42.78	427	Y											1998	1.03116	Y - Y	C - C	0	42.97	425	Y
																2460	0.128789	Y - Y	C - C	0	42.8	428	Y											2001	0.429862	Y - Y	C - C	0	40.82	427	Y
																1782	0.194949	Y - Y	C - C	0	42.82	429	Y											2003	0.078486	Y - Y	C - C	0	41.59	428	Y
																2612	0.348998	Y - Y	C - C	0	42.85	430	Y											2007	0.330943	Y - Y	C - C	0	49.14	431	Y
																527	0.808145	Y - Y	C - C	0	42.88	431	Y											2008	0.127208	Y - Y	C - C	0	36.24	432	Y
																2885	0.828258	Y - Y	C - C	0	42.96	433	Y											2013	0.426141	Y - Y	C - C	0	41.16	433	Y
																2613	1.03116	Y - Y	C - C	0	42.97	435	Y											2017	0.121682	Y - Y	C - C	0	48.83	434	Y
																1838	1.06804	Y - Y	C - C	0	42.99	436	Y											2027	0.510065	Y - Y	C - C	0	43.08	436	Y
																765	0.079315	Y - Y	C - C	0	43.01	438	Y											2029	1.3655	Y - Y	C - C	0	46.97	437	Y
																798	0.442912	Y - Y	C - C	0	43.02	440	Y											2031	0.241445	Y - Y	C - C	0	42.78	439	Y
																760	0.263482	Y - Y	C - C	0	43.03	441	Y											2033	0.441799	Y - Y	C - C	0	39.8	440	Y
																842	0.517202	Y - Y	C - C	0	43.03	442	Y											2039	0.117194	Y - Y	C - C	0	46.21	441	Y
																2651	0.510065	Y - Y	C - C	0	43.08	443	Y											2051	0.667611	Y - Y	C - C	0	48.86	442	Y
																3015	0.187272	Y - Y	C - C	0	43.12	444	Y											2060	0.858374	Y - Y	C - C	0	49.75	443	Y
																1381	0.552367	Y - Y	C - C	0	43.13	445	Y											2063	0.689247	Y - Y	C - C	0	35.16	444	Y
																1685	0.515751	Y - Y	C - C	0	43.15	446	Y											2073	0.534413	Y - Y	C - C	0	47.42	445	Y
																47	0.765149	Y - Y	C - C	0	43.19	447	Y											2075	0.284662	Y - Y	C - C	0	47.78	446	Y
																1147	0.764375	Y - Y	C - C	0	43.21	448	Y											2081	0.263349	Y - Y	C - C	0	47.42	448	Y
																1277	0.083974	Y - Y	C - C	0	43.21	449	Y											2086	0.294146	Y - Y	C - C	0	47.77	449	Y
																2380	0.348984	Y - Y	C - C	0	43.22	451	Y											2103	0.404112	Y - Y	C - C	0	45.01	450	Y
																2414	0.182093	Y - Y	C - C	0	43.26	452	Y											2104	0.457464	Y - Y	C - C	0	38.66	451	Y
																321	0.126557	Y - Y	C - C	0	43.3	453	Y											2113	1.22648	Y - Y	C - C	0	37.98	452	Y
																347	0.489034	Y - Y	C - C	0	43.32	454	Y											2116	0.372299	Y - Y	C - C	0	34.15	453	Y
																295	0.285934	Y - Y	C - C	0	43.33	455	Y											2126	1.05728	Y - Y	C - C	0	37.68	454	Y
																1111	0.180598	Y - Y	C - C	0	43.36	456	Y											2133	0.095067	Y - Y	C - C	0	35.5	455	Y
																2495	0.789914	Y - Y	C - C	0	43.36	457	Y											2138	0.175521	Y - Y	C - C	0	49.07	458	Y
																1184	0.207752	Y - Y	C - C	0	43.46	458	Y											2142	0.482725	Y - Y	C - C	0	39.74	460	Y
																489	0.538979	Y - Y	C - C	0	43.59	460	Y											2150	0.572734	Y - Y	C - C	0	35.77	463	Y
																496	0.129369	Y - Y	C - C	0	43.59	461	Y											2164	0.695576	Y - Y	C - C	0	47.21	465	Y
																3017	0.239003	Y - Y	C - C	0	43.59	463	Y											2166	0.647583	Y - Y	C - C	0	49.25	466	Y
																3018	0.08021	Y - Y	C - C	0	43.59	464	Y											2169	0.234613	Y - Y	C - C	0	37.83	468	Y
																679	0.525038	Y - Y	C - C	0	43.62	465	Y											2177	0.276316	Y - Y	C - C	0	49.24	469	Y
																1081	0.429045	Y - Y	C - C	0	43.68	466	Y											2179	1.03169	Y - Y	C - C	0	47.64	470	Y
																1359	0.617877	Y - Y	C - C	0	43.68	467	Y											2185	0.828258	Y - Y	C - C	0	42.96	471	Y
																1564	0.66998	Y - Y	C - C	0	43.71	469	Y											2188	0.198906	Y - Y	C - C	0	47.94	472	Y
																913	0.665027	Y - Y	C - C	0	43.72	470	Y											2191	0.404104	Y - Y	C - C	0	46.33	473	Y
																1560	0.265442	Y - Y	C - C	0	43.73	471	Y											2205	0.925651	Y - Y	C - C	0	32.6	474	Y
																1450	0.139404	Y - Y	C - C	0	43.75	472	Y											2213	0.155706	Y - Y	C - C	0	36.35	475	Y
																2004	0.093997	Y - Y	C - C	0	43.75	473	Y											2215	0.517576	Y - Y	C - C	0	38.74	476	Y
																70	1.09968	Y - Y	C - C	0	43.77	474	Y											2220	1.26809	Y - Y	C - C	0	46.64	477	Y
																3019	0.21508	Y - Y	C - C	0	43.78	475	Y											2226	0.158219	Y - Y	C - C	0	47.74	480	Y
																461	0.853757	Y - Y	C - C	0	43.83	477	Y											2229	0.551083	Y - Y	C - C	0	41.51	481	Y
																2260	0.129639	Y - Y	C - C	0	43.84	478	Y											2237	0.523418	Y - Y	C - C	0	48.91	482	Y
																1168	0.921077	Y - Y	C - C	0	43.92	479	Y											2241	0.253362	Y - Y	C - C	0	32.2	483	Y
																2318	0.125957	Y - Y	C - C	0	43.94	480	Y											28	0.284906	U - X	C - U	0	38.1	484	Y
																3020	0.074116	Y - Y	C - C	0	44.02	484	Y											162	0.547527	U - X	C - U	0	36.88	486	Y
																666	0.328072	Y - Y	C - C	0	44.05	485	Y											597	1.23686	U - X	C - U	0	36.34	487	Y
																2181	0.940067	Y - Y	C - C	0	44.06	486	Y											726	0.268242	U - X	C - U	0	42.2	488	Y
																2435	0.351123	Y - Y	C - C	0	44.09	487	Y											824	0.467408	U - X	C - U	0	39.44	489	Y
																446	0.297163	Y - Y	C - C	0	44.1	488	Y											853	1.30278	U - X	C - U	0	41.84	490	Y
																2457	0.11697	Y - Y	C - C	0	44.1	491	Y											932	0.46304	U - X	C - U	0	38.18	491	Y
																430	0.265055	Y - Y	C - C	0	44.11	492	Y											1101	0.004245	U - X	C - U	0	43.09	492	Y
																1533	0.847763	Y - Y	C - C	0	44.12	494	Y											1107	0.27518	U - X	C - U	0	35.04	494	Y
																729	0.102753	Y - Y	C - C	0	44.17	495	Y											11	0.612001	I - X	C - I	0	43.26	495	Y
																874	0.616729	Y - Y	C - C	0	44.19	496	Y											13	0.60958	I - X	C - I	0	43.72	496	Y
																532	0.432045	Y - Y	C - C	0	44.2	498	Y											129	0.725229	I - X	C - I	0	47.28	498	Y
																2681	0.378928	Y - Y	C - C	0	44.2	499	Y											142	0.556772	I - X	C - I	0	41.32	500	Y
																1382	0.292273	Y - Y	C - C	0	44.24	500	Y											164	0.600521	I - X	C - I	0	34.35	501	Y
																1544	0.432221	Y - Y	C - C	0	44.25	501	Y											183	1.87393	I - X	C - I	0	37.12	502	Y
																600	0.235627	Y - Y	C - C	0	44.28	502	Y											849	0.978371	I - X	C - I	0	38.09	503	Y
																617	0.207835	Y - Y	C - C	0	44.28	504	Y											862	0.435844	I - X	C - I	0	34.61	504	Y
																689	0.241709	Y - Y	C - C	0	44.33	506	Y											910	0.309348	I - X	C - I	0	40.28	505	Y
																1581	0.156564	Y - Y	C - C	0	44.33	507	Y											940	0.476808	I - X	C - I	0	44.72	506	Y
																1477	0.201751	Y - Y	C - C	0	44.34	508	Y											1033	1.6763	I - X	C - I	0	34.94	508	Y
																3010	0.295024	Y - Y	C - C	0	44.34	509	Y											1197	0.456024	I - X	C - I	0	48.98	509	Y
																2012	0.143198	Y - Y	C - C	0	44.35	510	Y											1211	0.329045	I - X	C - I	0	42.24	511	Y
																2051	0.193972	Y - Y	C - C	0	44.35	511	Y											1368	0.263553	I - X	C - I	0	45.6	512	Y
																2081	0.18782	Y - Y	C - C	0	44.35	512	Y											1417	0.620244	I - X	C - I	0	49.09	513	Y
																1991	0.474145	Y - Y	C - C	0	44.36	513	Y											1536	0.466086	I - X	C - I	0	38.57	516	Y
																3011	0.088535	Y - Y	C - C	0	44.36	514	Y											2082	0.318604	I - X	C - I	0	41.64	517	Y
																275	0.617449	Y - Y	C - C	0	44.38	515	Y											2130	0.657835	I - X	C - I	0	49.9	518	Y
																646	0.516624	Y - Y	C - C	0	44.44	516	Y											1	0.162071	I - Y	C - I	0	36.19	519	Y
																2325	0.471871	Y - Y	C - C	0	44.49	517	Y											2	0.4827	I - Y	C - I	0	46.17	520	Y
																2907	0.123395	Y - Y	C - C	0	44.51	518	Y											3	0.143333	I - Y	C - I	0	45.37	522	Y
																18	0.601626	Y - Y	C - C	0	44.54	520	Y											15	0.948192	I - Y	C - I	0	45.08	527	Y
																1243	0.202097	Y - Y	C - C	0	44.56	521	Y											332	0.684412	I - Y	C - I	0	33.45	528	Y
																1617	0.265693	Y - Y	C - C	0	44.56	522	Y											400	0.736435	I - Y	C - I	0	48.71	529	Y
																2541	0.471512	Y - Y	C - C	0	44.57	523	Y											410	0.27483	I - Y	C - I	0	36.72	532	Y
																2556	0.168508	Y - Y	C - C	0	44.59	524	Y											468	0.634418	I - Y	C - I	0	36.04	533	Y
																1031	0.457326	Y - Y	C - C	0	44.6	525	Y											541	1.39743	I - Y	C - I	0	31.25	534	Y
																85	0.702697	Y - Y	C - C	0	44.61	526	Y											590	0.102753	I - Y	C - I	0	44.17	535	Y
																1926	0.825072	Y - Y	C - C	0	44.61	527	Y											795	1.8158	I - Y	C - I	0	35.94	536	Y
																2155	0.945402	Y - Y	C - C	0	44.63	528	Y											808	0.669838	I - Y	C - I	0	49.32	537	Y
																2726	0.364804	Y - Y	C - C	0	44.63	530	Y											846	1.00655	I - Y	C - I	0	45.32	538	Y
																1213	0.926046	Y - Y	C - C	0	44.64	531	Y											895	0.180598	I - Y	C - I	0	43.36	539	Y
																2147	0.235683	Y - Y	C - C	0	44.64	533	Y											908	0.924611	I - Y	C - I	0	35.53	541	Y
																701	0.156768	Y - Y	C - C	0	44.66	536	Y											1138	0.925394	I - Y	C - I	0	35.2	542	Y
																1118	0.325204	Y - Y	C - C	0	44.66	538	Y											1269	0.385137	I - Y	C - I	0	47.29	543	Y
																761	0.561311	Y - Y	C - C	0	44.67	539	Y											1300	0.326177	I - Y	C - I	0	47.01	544	Y
																1012	0.965797	Y - Y	C - C	0	44.72	542	Y											1356	0.394146	I - Y	C - I	0	47.67	545	Y
																1565	0.932853	Y - Y	C - C	0	44.73	543	Y											1382	0.331464	I - Y	C - I	0	41.33	546	Y
																2238	1.11117	Y - Y	C - C	0	44.73	544	Y											1394	0.798574	I - Y	C - I	0	33.66	547	Y
																2528	0.471688	Y - Y	C - C	0	44.75	545	Y											1409	0.306024	I - Y	C - I	0	46.13	548	Y
																2408	0.771332	Y - Y	C - C	0	44.78	547	Y											1425	0.919224	I - Y	C - I	0	36.55	549	Y
																522	0.112147	Y - Y	C - C	0	45	549	Y											1440	0.123479	I - Y	C - I	0	45.98	550	Y
																537	0.173948	Y - Y	C - C	0	45	551	Y											1464	0.310033	I - Y	C - I	0	37.4	551	Y
																558	0.303066	Y - Y	C - C	0	45	552	Y											1575	0.665841	I - Y	C - I	0	35.78	553	Y
																1385	0.246922	Y - Y	C - C	0	45	554	Y											1747	0.474861	I - Y	C - I	0	49.48	554	Y
																1793	0.190777	Y - Y	C - C	0	45	556	Y											1892	0.570379	I - Y	C - I	0	47.45	555	Y
																1951	0.21892	Y - Y	C - C	0	45	557	Y											1904	0.105713	I - Y	C - I	0	45.11	558	Y
																1978	0.151462	Y - Y	C - C	0	45	559	Y											1913	0.798968	I - Y	C - I	0	39.93	559	Y
																2179	0.130956	Y - Y	C - C	0	45	560	Y											1928	0.129334	I - Y	C - I	0	45.47	560	Y
																187	0.370453	Y - Y	C - C	0	45.01	561	Y											1986	0.557934	I - Y	C - I	0	39.81	561	Y
																2758	0.404112	Y - Y	C - C	0	45.01	562	Y											2050	0.378928	I - Y	C - I	0	44.2	563	Y
																2493	0.105713	Y - Y	C - C	0	45.11	563	Y											2059	0.667577	I - Y	C - I	0	32.5	564	Y
																3014	1.36131	Y - Y	C - C	0	45.11	564	Y											2122	0.301838	I - Y	C - I	0	43.45	566	Y
																1301	0.295377	Y - Y	C - C	0	45.15	566	Y											2132	0.762328	I - Y	C - I	0	48.81	567	Y
																1425	0.151817	Y - Y	C - C	0	45.24	567	Y											2134	0.649736	I - Y	C - I	0	40.91	568	Y
																1045	1.00655	Y - Y	C - C	0	45.32	568	Y											2171	0.62613	I - Y	C - I	0	40.8	569	Y
																1742	0.465947	Y - Y	C - C	0	45.32	569	Y											2217	1.1636	I - Y	C - I	0	49.1	570	Y
																749	1.14404	Y - Y	C - C	0	45.33	570	Y											2231	0.589325	I - Y	C - I	0	48.24	571	Y
																801	0.589101	Y - Y	C - C	0	45.34	571	Y											1392	0.991335	U - X	C - U	0	44.73	572	Y
																1195	0.241057	Y - Y	C - C	0	45.35	572	Y											1926	0.171947	U - X	C - U	0	38.7	574	Y
																1657	0.291545	Y - Y	C - C	0	45.35	574	Y											1927	0.219551	U - X	C - U	0	42.99	575	Y
																1223	0.297769	Y - Y	C - C	0	45.37	575	Y											2084	0.18466	U - X	C - U	0	35.41	576	Y
																2578	0.365018	Y - Y	C - C	0	45.42	576	Y											2112	0.598027	U - X	C - U	0	35.82	577	Y
																355	0.359646	Y - Y	C - C	0	45.45	578	Y											2135	0.194049	U - X	C - U	0	45.79	578	Y
																2521	0.129334	Y - Y	C - C	0	45.47	580	Y											2155	0.0104	U - X	C - U	0	43.05	580	Y
																2608	0.121626	Y - Y	C - C	0	45.47	581	Y											2183	0.547128	U - X	C - U	0	38.24	581	Y
																1284	0.381356	Y - Y	C - C	0	45.48	582	Y											2199	0.413624	U - X	C - U	0	42.36	584	Y
																1366	0.123678	Y - Y	C - C	0	45.49	583	Y											2200	0.727294	U - X	C - U	0	46.1	585	Y
																1330	0.10105	Y - Y	C - C	0	45.52	584	Y											2210	1.93855	U - X	C - U	0	49.42	589	Y
																653	1.63388	Y - Y	C - C	0	45.59	585	Y											2221	0.241945	U - X	C - U	0	38.56	590	Y
																780	0.259295	Y - Y	C - C	0	45.59	586	Y											2246	0.690586	U - X	C - U	0	35.34	591	Y
																250	0.09504	Y - Y	C - C	0	45.6	587	Y											2250	0.28468	U - X	C - U	0	48.37	593	Y
																592	0.100768	Y - Y	C - C	0	45.6	589	Y											10	0.272775	U - Y	C - U	0	35.53	594	Y
																599	0.100485	Y - Y	C - C	0	45.6	590	Y											61	0.321163	U - Y	C - U	0	42.07	597	Y
																2026	0.135206	Y - Y	C - C	0	45.6	591	Y											83	0.424231	U - Y	C - U	0	40.06	600	Y
																948	0.123397	Y - Y	C - C	0	45.62	592	Y											100	0.385401	U - Y	C - U	0	32.35	601	Y
																634	0.387942	Y - Y	C - C	0	45.63	593	Y											119	0.219769	U - Y	C - U	0	45	602	Y
																924	0.269	Y - Y	C - C	0	45.63	594	Y											193	0.255799	U - Y	C - U	0	49.77	603	Y
																935	0.387448	Y - Y	C - C	0	45.64	595	Y											202	0.22579	U - Y	C - U	0	45.56	604	Y
																2291	0.295237	Y - Y	C - C	0	45.67	599	Y											259	0.150609	U - Y	C - U	0	43.41	605	Y
																4	0.359124	Y - Y	C - C	0	45.68	600	Y											279	0.006684	U - Y	C - U	0	38.93	609	Y
																52	0.095325	Y - Y	C - C	0	45.68	601	Y											337	0.207297	U - Y	C - U	0	32.67	611	Y
																733	0.095042	Y - Y	C - C	0	45.68	602	Y											430	0.508967	U - Y	C - U	0	48.52	613	Y
																723	1.05543	Y - Y	C - C	0	45.69	603	Y											479	0.167476	U - Y	C - U	0	34.93	620	Y
																1874	0.758023	Y - Y	C - C	0	45.74	605	Y											536	0.108738	U - Y	C - U	0	42.24	621	Y
																167	0.662615	Y - Y	C - C	0	45.75	606	Y											637	1.11022	U - Y	C - U	0	47.48	622	Y
																204	0.106641	Y - Y	C - C	0	45.76	611	Y											691	0.532012	U - Y	C - U	0	43.48	624	Y
																1696	0.123259	Y - Y	C - C	0	45.76	612	Y											716	0.533599	U - Y	C - U	0	38.59	627	Y
																240	0.278696	Y - Y	C - C	0	45.77	613	Y											804	0.365791	U - Y	C - U	0	35.59	628	Y
																1676	0.179621	Y - Y	C - C	0	45.77	614	Y											977	1.18006	U - Y	C - U	0	37.84	629	Y
																219	0.445377	Y - Y	C - C	0	45.78	617	Y											1032	0.699378	U - Y	C - U	0	33.58	633	Y
																378	0.617297	Y - Y	C - C	0	45.79	618	Y											1232	0.424756	U - Y	C - U	0	41.5	634	Y
																2303	0.641178	Y - Y	C - C	0	45.8	619	Y											1369	0.374185	U - Y	C - U	0	42.83	636	Y
																2452	0.387323	Y - Y	C - C	0	45.83	620	Y											1667	1.67908	U - Y	C - U	0	38.38	639	Y
																1033	0.308756	Y - Y	C - C	0	45.84	621	Y											1672	0.043355	U - Y	C - U	0	34.57	640	Y
																1481	0.763405	Y - Y	C - C	0	45.84	622	Y											1831	0.107632	U - Y	C - U	0	42.78	641	Y
																1661	0.123688	Y - Y	C - C	0	45.88	623	Y											2015	1.14598	U - Y	C - U	0	41.12	642	Y
																403	0.398931	Y - Y	C - C	0	45.92	624	Y											2044	0.974639	U - Y	C - U	0	42.08	643	Y
																1658	0.527082	Y - Y	C - C	0	45.93	626	Y											2105	0.508792	U - Y	C - U	0	45.22	648	Y
																1216	0.212658	Y - Y	C - C	0	45.97	628	Y											2203	2.33806	U - Y	C - U	0	46.53	650	Y
																1862	0.123479	Y - Y	C - C	0	45.98	629	Y											2222	1.41306	U - Y	C - U	0	45.16	653	Y
																860	0.374545	Y - Y	C - C	0	46.04	630	Y											2232	1.2204	U - Y	C - U	0	38.9	654	Y
																1812	0.306024	Y - Y	C - C	0	46.13	631	Y											2245	0.418532	U - Y	C - U	0	30.64	655	Y
																1779	0.280995	Y - Y	C - C	0	46.2	632	Y											2247	0.367611	U - Y	C - U	0	49.47	659	Y
																1013	0.24146	Y - Y	C - C	0	46.21	633	Y											2248	0.177643	U - Y	C - U	0	35.95	662	Y
																2666	0.117194	Y - Y	C - C	0	46.21	634	Y											2251	0.052259	Y - U	C - U	0	44.3	663	Y
																987	0.550113	Y - Y	C - C	0	46.22	635	Y											841	0.155277	U - U	U - U	0	39.28	666	Y
																453	0.10878	Y - Y	C - C	0	46.27	636	Y											1630	0.456743	I - I	I - I	0	36.44	669	Y
																447	0.091452	Y - Y	C - C	0	46.28	637	Y											39	0.685591	X - X	C - C	1	50.49	670	Y
																1994	0.869977	Y - Y	C - C	0	46.28	638	Y											187	1.38566	X - X	C - C	1	50.15	671	Y
																958	0.531104	Y - Y	C - C	0	46.3	639	Y											925	1.2943	X - X	C - C	1	52.63	673	Y
																1722	0.478748	Y - Y	C - C	0	46.32	640	Y											1256	1.18078	X - X	C - C	1	51.36	675	Y
																1589	0.118472	Y - Y	C - C	0	46.33	641	Y											76	0.197378	X - Y	C - C	1	54.26	679	Y
																2898	0.404104	Y - Y	C - C	0	46.33	642	Y											103	1.06488	X - Y	C - C	1	50.38	680	Y
																519	0.145642	Y - Y	C - C	0	46.47	643	Y											154	0.969746	X - Y	C - C	1	51.58	682	Y
																899	0.445842	Y - Y	C - C	0	46.5	646	Y											189	0.602645	X - Y	C - C	1	52.28	685	Y
																919	0.26179	Y - Y	C - C	0	46.5	647	Y											224	0.759426	X - Y	C - C	1	69.03	687	Y
																938	0.62657	Y - Y	C - C	0	46.5	648	Y											237	0.653715	X - Y	C - C	1	75.64	688	Y
																1751	0.207684	Y - Y	C - C	0	46.56	649	Y											263	1.28212	X - Y	C - C	1	51.82	693	Y
																1344	0.162839	Y - Y	C - C	0	46.59	651	Y											323	0.153519	X - Y	C - C	1	50.52	694	Y
																1585	0.313581	Y - Y	C - C	0	46.59	652	Y											351	0.657129	X - Y	C - C	1	53.05	695	Y
																1600	0.14289	Y - Y	C - C	0	46.59	654	Y											502	0.47224	X - Y	C - C	1	77.07	698	Y
																1669	0.548576	Y - Y	C - C	0	46.6	655	Y											527	0.828221	X - Y	C - C	1	50.07	699	Y
																1716	0.187246	Y - Y	C - C	0	46.62	656	Y											557	0.767282	X - Y	C - C	1	98.88	700	Y
																2942	1.26809	Y - Y	C - C	0	46.64	657	Y											627	0.381501	X - Y	C - C	1	53.28	701	Y
																2022	0.214841	Y - Y	C - C	0	46.68	658	Y											651	0.655574	X - Y	C - C	1	63.49	702	Y
																1916	0.199561	Y - Y	C - C	0	46.69	659	Y											714	0.126127	X - Y	C - C	1	91.18	703	Y
																2052	0.139078	Y - Y	C - C	0	46.69	660	Y											715	0.95489	X - Y	C - C	1	74.65	704	Y
																1887	0.096281	Y - Y	C - C	0	46.73	661	Y											768	0.435327	X - Y	C - C	1	86.97	705	Y
																2412	0.432319	Y - Y	C - C	0	46.73	664	Y											770	0.659246	X - Y	C - C	1	99.45	706	Y
																847	0.274771	Y - Y	C - C	0	46.77	668	Y											966	1.07702	X - Y	C - C	1	58.24	708	Y
																827	0.162856	Y - Y	C - C	0	46.79	669	Y											984	2.33565	X - Y	C - C	1	51.22	709	Y
																2826	0.807776	Y - Y	C - C	0	46.81	670	Y											1223	0.116042	X - Y	C - C	1	52.77	710	Y
																314	0.213868	Y - Y	C - C	0	46.84	671	Y											1248	0.85137	X - Y	C - C	1	53.62	711	Y
																298	0.586215	Y - Y	C - C	0	46.85	672	Y											1271	0.331655	X - Y	C - C	1	50.33	715	Y
																2901	0.275866	Y - Y	C - C	0	46.98	674	Y											1277	0.601776	X - Y	C - C	1	50.66	716	Y
																1431	0.325748	Y - Y	C - C	0	46.99	675	Y											1279	0.162351	X - Y	C - C	1	50.35	717	Y
																1672	0.326177	Y - Y	C - C	0	47.01	677	Y											1293	0.522106	X - Y	C - C	1	50.56	718	Y
																1968	0.418478	Y - Y	C - C	0	47.05	678	Y											1301	0.628296	X - Y	C - C	1	54.41	719	Y
																602	0.365601	Y - Y	C - C	0	47.07	679	Y											1354	0.312539	X - Y	C - C	1	50.02	720	Y
																609	0.100618	Y - Y	C - C	0	47.09	683	Y											1456	0.236006	X - Y	C - C	1	102.14	721	Y
																828	0.646397	Y - Y	C - C	0	47.15	684	Y											1463	0.139093	X - Y	C - C	1	100.19	722	Y
																853	0.307454	Y - Y	C - C	0	47.15	685	Y											1486	0.301319	X - Y	C - C	1	60.06	723	Y
																2148	0.325711	Y - Y	C - C	0	47.15	686	Y											1521	0.474755	X - Y	C - C	1	100.32	724	Y
																2196	0.314531	Y - Y	C - C	0	47.15	689	Y											1603	0.137244	X - Y	C - C	1	104.95	728	Y
																1268	0.140037	Y - Y	C - C	0	47.17	690	Y											1641	1.0643	X - Y	C - C	1	55.11	729	Y
																1249	0.303638	Y - Y	C - C	0	47.18	691	Y											1940	0.634812	X - Y	C - C	1	51.88	730	Y
																971	0.300179	Y - Y	C - C	0	47.21	694	Y											1983	3.17792	X - Y	C - C	1	51.19	731	Y
																2854	0.695576	Y - Y	C - C	0	47.21	698	Y											2005	0.319135	X - Y	C - C	1	54.53	732	Y
																985	0.2239	Y - Y	C - C	0	47.24	699	Y											2011	0.079502	X - Y	C - C	1	54.47	733	Y
																2034	0.140398	Y - Y	C - C	0	47.25	701	Y											2034	0.484187	X - Y	C - C	1	56.79	734	Y
																1625	0.385137	Y - Y	C - C	0	47.29	702	Y											2046	1.20034	X - Y	C - C	1	100.67	735	Y
																867	0.223861	Y - Y	C - C	0	47.37	703	Y											2058	0.264942	X - Y	C - C	1	103.8	736	Y
																246	0.181389	Y - Y	C - C	0	47.39	704	Y											2071	0.611366	X - Y	C - C	1	52.5	739	Y
																263	0.357895	Y - Y	C - C	0	47.39	705	Y											2089	0.181871	X - Y	C - C	1	82.23	740	Y
																2711	0.534413	Y - Y	C - C	0	47.42	706	Y											2106	0.89295	X - Y	C - C	1	52.73	741	Y
																2729	0.263349	Y - Y	C - C	0	47.42	710	Y											2118	0.961149	X - Y	C - C	1	70.56	743	Y
																2476	0.570379	Y - Y	C - C	0	47.45	712	Y											2211	1.08169	X - Y	C - C	1	51.15	744	Y
																1900	0.602605	Y - Y	C - C	0	47.54	713	Y											2233	0.35238	X - Y	C - C	1	51.64	745	Y
																2877	1.03169	Y - Y	C - C	0	47.64	714	Y											2236	0.21265	X - Y	C - C	1	51.66	747	Y
																1738	0.394146	Y - Y	C - C	0	47.67	722	Y											72	0.864194	Y - Y	C - C	1	64.93	750	Y
																1279	0.590524	Y - Y	C - C	0	47.72	723	Y											118	0.320919	Y - Y	C - C	1	95.86	751	Y
																698	0.127424	Y - Y	C - C	0	47.74	724	Y											125	0.225671	Y - Y	C - C	1	51.33	753	Y
																2950	0.158219	Y - Y	C - C	0	47.74	726	Y											192	0.334258	Y - Y	C - C	1	50.79	754	Y
																2247	0.491123	Y - Y	C - C	0	47.76	728	Y											207	0.428501	Y - Y	C - C	1	90.44	756	Y
																1093	0.356658	Y - Y	C - C	0	47.77	729	Y											213	0.353641	Y - Y	C - C	1	52.09	757	Y
																2737	0.294146	Y - Y	C - C	0	47.77	731	Y											245	0.302194	Y - Y	C - C	1	98.47	758	Y
																2720	0.284662	Y - Y	C - C	0	47.78	732	Y											257	0.675458	Y - Y	C - C	1	62.92	759	Y
																2768	0.118868	Y - Y	C - C	0	47.83	733	Y											267	0.717338	Y - Y	C - C	1	50.08	760	Y
																67	0.093878	Y - Y	C - C	0	47.85	734	Y											304	0.872456	Y - Y	C - C	1	54.99	761	Y
																518	0.05678	Y - Y	C - C	0	47.86	735	Y											308	0.293383	Y - Y	C - C	1	58.41	762	Y
																1875	0.469964	Y - Y	C - C	0	47.86	738	Y											312	0.279129	Y - Y	C - C	1	55.45	763	Y
																1885	0.091968	Y - Y	C - C	0	47.86	739	Y											327	0.578879	Y - Y	C - C	1	62.03	764	Y
																524	0.060675	Y - Y	C - C	0	47.87	740	Y											357	1.22491	Y - Y	C - C	1	52.7	765	Y
																565	0.577021	Y - Y	C - C	0	47.88	741	Y											375	1.02787	Y - Y	C - C	1	83.58	766	Y
																875	0.149179	Y - Y	C - C	0	47.91	744	Y											382	0.437689	Y - Y	C - C	1	85.72	768	Y
																1058	1.11244	Y - Y	C - C	0	47.91	745	Y											411	0.35289	Y - Y	C - C	1	50.81	769	Y
																2891	0.198906	Y - Y	C - C	0	47.94	746	Y											487	0.582188	Y - Y	C - C	1	96.06	770	Y
																830	0.737996	Y - Y	C - C	0	47.97	747	Y											504	0.586107	Y - Y	C - C	1	75.26	771	Y
																636	0.135666	Y - Y	C - C	0	47.99	748	Y											510	0.291139	Y - Y	C - C	1	100.99	772	Y
																970	0.200035	Y - Y	C - C	0	48.02	749	Y											544	0.60557	Y - Y	C - C	1	103.1	773	Y
																19	0.163428	Y - Y	C - C	0	48.03	751	Y											573	0.245169	Y - Y	C - C	1	51.77	775	Y
																652	0.184671	Y - Y	C - C	0	48.03	756	Y											589	0.482044	Y - Y	C - C	1	95.85	776	Y
																1370	0.427863	Y - Y	C - C	0	48.11	757	Y											598	0.462367	Y - Y	C - C	1	51.79	777	Y
																1374	0.087389	Y - Y	C - C	0	48.15	761	Y											621	0.323363	Y - Y	C - C	1	51	778	Y
																1246	0.202333	Y - Y	C - C	0	48.19	762	Y											623	0.110247	Y - Y	C - C	1	59.71	779	Y
																688	0.904993	Y - Y	C - C	0	48.2	763	Y											625	0.105513	Y - Y	C - C	1	51	780	Y
																770	0.907888	Y - Y	C - C	0	48.2	764	Y											633	0.463799	Y - Y	C - C	1	74.05	781	Y
																2955	0.589325	Y - Y	C - C	0	48.24	767	Y											653	1.31775	Y - Y	C - C	1	57.61	784	Y
																2547	0.135705	Y - Y	C - C	0	48.29	770	Y											658	0.282875	Y - Y	C - C	1	64.59	786	Y
																1394	0.102702	Y - Y	C - C	0	48.32	771	Y											660	0.316199	Y - Y	C - C	1	101.25	787	Y
																2402	0.504825	Y - Y	C - C	0	48.36	773	Y											670	0.152303	Y - Y	C - C	1	58.31	788	Y
																659	0.285328	Y - Y	C - C	0	48.41	774	Y											682	0.075642	Y - Y	C - C	1	53.49	789	Y
																429	0.717923	Y - Y	C - C	0	48.42	777	Y											683	1.03073	Y - Y	C - C	1	91.43	790	Y
																1867	0.937121	Y - Y	C - C	0	48.49	779	Y											687	1.54427	Y - Y	C - C	1	67.93	791	Y
																2061	0.607496	Y - Y	C - C	0	48.5	780	Y											695	1.06691	Y - Y	C - C	1	80.91	794	Y
																644	1.7844	Y - Y	C - C	0	48.52	782	Y											696	0.333779	Y - Y	C - C	1	92.73	795	Y
																1941	0.20965	Y - Y	C - C	0	48.62	783	Y											701	0.277181	Y - Y	C - C	1	67.67	796	Y
																281	0.233178	Y - Y	C - C	0	48.63	784	Y											711	0.431898	Y - Y	C - C	1	58.07	799	Y
																696	0.084458	Y - Y	C - C	0	48.65	786	Y											712	0.224912	Y - Y	C - C	1	65.77	800	Y
																712	0.17997	Y - Y	C - C	0	48.65	788	Y											717	0.95678	Y - Y	C - C	1	61.28	802	Y
																1910	0.087506	Y - Y	C - C	0	48.66	789	Y											721	0.639293	Y - Y	C - C	1	91.7	803	Y
																51	1.43262	Y - Y	C - C	0	48.67	790	Y											738	0.884881	Y - Y	C - C	1	60.94	805	Y
																2816	0.109688	Y - Y	C - C	0	48.7	791	Y											740	0.468736	Y - Y	C - C	1	54.51	806	Y
																485	0.736435	Y - Y	C - C	0	48.71	793	Y											743	0.657725	Y - Y	C - C	1	65.97	807	Y
																2799	0.762328	Y - Y	C - C	0	48.81	798	Y											755	0.284122	Y - Y	C - C	1	52.9	809	Y
																2637	0.121682	Y - Y	C - C	0	48.83	799	Y											759	0.352302	Y - Y	C - C	1	104.94	810	Y
																2685	0.667611	Y - Y	C - C	0	48.86	801	Y											832	2.07616	Y - Y	C - C	1	52.52	811	Y
																2441	0.226336	Y - Y	C - C	0	48.87	802	Y											837	0.390489	Y - Y	C - C	1	52.43	812	Y
																1573	0.996282	Y - Y	C - C	0	48.88	804	Y											902	0.615905	Y - Y	C - C	1	61.62	813	Y
																2962	0.523418	Y - Y	C - C	0	48.91	806	Y											930	0.076259	Y - Y	C - C	1	50.21	814	Y
																1798	0.224232	Y - Y	C - C	0	48.92	807	Y											936	0.321131	Y - Y	C - C	1	50.03	816	Y
																1457	0.815754	Y - Y	C - C	0	48.95	809	Y											957	0.221661	Y - Y	C - C	1	56.58	817	Y
																577	0.241992	Y - Y	C - C	0	48.99	813	Y											1008	0.459073	Y - Y	C - C	1	93.96	820	Y
																840	0.504393	Y - Y	C - C	0	49	814	Y											1012	0.370581	Y - Y	C - C	1	80.13	821	Y
																2811	0.175521	Y - Y	C - C	0	49.07	815	Y											1016	0.196361	Y - Y	C - C	1	76.33	822	Y
																2080	0.111157	Y - Y	C - C	0	49.09	817	Y											1024	1.08656	Y - Y	C - C	1	51.31	823	Y
																2939	1.1636	Y - Y	C - C	0	49.1	818	Y											1028	0.084398	Y - Y	C - C	1	51.01	825	Y
																2627	0.330943	Y - Y	C - C	0	49.14	819	Y											1030	0.84584	Y - Y	C - C	1	81.06	828	Y
																1667	0.533013	Y - Y	C - C	0	49.17	821	Y											1039	0.546157	Y - Y	C - C	1	60.1	830	Y
																521	0.51951	Y - Y	C - C	0	49.19	823	Y											1040	0.527165	Y - Y	C - C	1	60.1	831	Y
																2836	0.218884	Y - Y	C - C	0	49.24	825	Y											1045	0.160612	Y - Y	C - C	1	50.99	833	Y
																2875	0.276316	Y - Y	C - C	0	49.24	826	Y											1064	1.19572	Y - Y	C - C	1	54.29	834	Y
																2106	0.507966	Y - Y	C - C	0	49.25	827	Y											1120	0.761241	Y - Y	C - C	1	90.09	835	Y
																2856	0.428699	Y - Y	C - C	0	49.26	828	Y											1124	0.342789	Y - Y	C - C	1	100.27	838	Y
																2587	0.70354	Y - Y	C - C	0	49.27	829	Y											1156	0.277823	Y - Y	C - C	1	52.87	840	Y
																2283	0.474861	Y - Y	C - C	0	49.48	830	Y											1167	1.01794	Y - Y	C - C	1	101.83	842	Y
																2428	0.602692	Y - Y	C - C	0	49.5	831	Y											1176	0.559848	Y - Y	C - C	1	58.42	845	Y
																952	0.119735	Y - Y	C - C	0	49.54	832	Y											1219	0.151323	Y - Y	C - C	1	50.82	846	Y
																1539	0.184218	Y - Y	C - C	0	49.56	833	Y											1229	0.196037	Y - Y	C - C	1	50.84	847	Y
																2177	0.121514	Y - Y	C - C	0	49.57	835	Y											1237	0.880176	Y - Y	C - C	1	50.88	849	Y
																2695	0.858374	Y - Y	C - C	0	49.75	836	Y											1252	2.51676	Y - Y	C - C	1	53.51	850	Y
																557	0.280139	Y - Y	C - C	0	49.78	839	Y											1308	0.67622	Y - Y	C - C	1	53.35	851	Y
																540	0.181727	Y - Y	C - C	0	49.8	840	Y											1327	0.248548	Y - Y	C - C	1	50.47	852	Y
																1438	1.10085	Y - Y	C - C	0	49.85	841	Y											1339	0.59851	Y - Y	C - C	1	50.23	853	Y
																1785	0.167781	Y - Y	C - C	0	49.93	843	Y											1345	0.498472	Y - Y	C - C	1	73.03	856	Y
																1771	0.288585	Y - Y	C - C	0	49.95	844	Y											1362	0.56222	Y - Y	C - C	1	53.13	857	Y
																81	0.197378	X - Y	C - C	1	54.26	845	Y											1402	0.444752	Y - Y	C - C	1	59.29	858	Y
																117	1.06488	X - Y	C - C	1	50.38	846	Y											1429	0.992431	Y - Y	C - C	1	53.13	861	Y
																179	0.969746	X - Y	C - C	1	51.58	847	Y											1433	0.726573	Y - Y	C - C	1	67.59	862	Y
																183	0.682057	X - Y	C - C	1	52.38	848	Y											1461	0.925509	Y - Y	C - C	1	50.92	865	Y
																41	0.685591	X - X	C - C	1	50.49	849	Y											1493	1.145	Y - Y	C - C	1	66.15	867	Y
																222	1.38566	X - X	C - C	1	50.15	851	Y											1589	0.839814	Y - Y	C - C	1	93.1	868	Y
																596	0.294025	X - X	C - C	1	54.83	853	Y											1592	0.241678	Y - Y	C - C	1	75.53	870	Y
																1113	0.70737	X - X	C - C	1	51.67	854	Y											1596	0.154293	Y - Y	C - C	1	94.09	872	Y
																1115	0.820247	X - X	C - C	1	54.57	859	Y											1628	0.252456	Y - Y	C - C	1	76.33	873	Y
																1151	1.2943	X - X	C - C	1	52.63	860	Y											1649	1.15641	Y - Y	C - C	1	64.52	874	Y
																1172	0.22731	X - X	C - C	1	104.97	861	Y											1653	0.35501	Y - Y	C - C	1	94.1	875	Y
																1341	1.19683	X - X	C - C	1	50.06	862	Y											1659	0.516234	Y - Y	C - C	1	89.92	876	Y
																1448	0.812235	X - X	C - C	1	56.58	863	Y											1661	0.757234	Y - Y	C - C	1	52.95	877	Y
																1609	1.18078	X - X	C - C	1	51.36	865	Y											1668	0.184268	Y - Y	C - C	1	67.88	878	Y
																1632	0.141194	X - X	C - C	1	54.4	866	Y											1689	0.304608	Y - Y	C - C	1	55.62	880	Y
																1765	0.791914	X - X	C - C	1	50.95	867	Y											1692	0.509333	Y - Y	C - C	1	92.91	881	Y
																1987	0.492365	X - X	C - C	1	53.58	868	Y											1698	0.383245	Y - Y	C - C	1	96.17	882	Y
																2298	0.541534	X - X	C - C	1	51.76	869	Y											1702	0.670916	Y - Y	C - C	1	51.02	883	Y
																2309	0.442355	X - X	C - C	1	50.11	872	Y											1718	0.438922	Y - Y	C - C	1	56.07	886	Y
																2348	0.42419	X - X	C - C	1	54.42	873	Y											1735	1.0132	Y - Y	C - C	1	55.96	887	Y
																2699	1.29161	X - X	C - C	1	50.32	874	Y											1744	0.17829	Y - Y	C - C	1	59.05	889	Y
																224	0.602645	X - Y	C - C	1	52.28	875	Y											1768	0.317368	Y - Y	C - C	1	57.54	890	Y
																265	0.759426	X - Y	C - C	1	69.03	876	Y											1771	0.178385	Y - Y	C - C	1	69.15	891	Y
																278	0.528185	X - Y	C - C	1	78.18	878	Y											1778	0.29855	Y - Y	C - C	1	50.94	892	Y
																315	1.28212	X - Y	C - C	1	51.82	879	Y											1794	0.161928	Y - Y	C - C	1	52.41	893	Y
																389	0.153519	X - Y	C - C	1	50.52	880	Y											1796	0.731553	Y - Y	C - C	1	58.61	894	Y
																425	0.657129	X - Y	C - C	1	53.05	881	Y											1808	0.777437	Y - Y	C - C	1	76.11	897	Y
																610	0.47224	X - Y	C - C	1	77.07	882	Y											1820	0.264766	Y - Y	C - C	1	54.59	898	Y
																649	0.828221	X - Y	C - C	1	50.07	884	Y											1840	0.466203	Y - Y	C - C	1	99.43	899	Y
																670	0.132317	X - Y	C - C	1	102.66	886	Y											1851	0.954682	Y - Y	C - C	1	79.9	900	Y
																678	0.449083	X - Y	C - C	1	99.51	887	Y											1857	0.459681	Y - Y	C - C	1	58.81	905	Y
																776	0.381501	X - Y	C - C	1	53.28	889	Y											1864	0.835036	Y - Y	C - C	1	53.1	906	Y
																803	0.655574	X - Y	C - C	1	63.49	890	Y											1866	0.29649	Y - Y	C - C	1	72.98	911	Y
																820	0.316199	X - Y	C - C	1	101.25	892	Y											1870	0.150708	Y - Y	C - C	1	51.41	913	Y
																883	0.126127	X - Y	C - C	1	91.18	893	Y											1949	0.236883	Y - Y	C - C	1	50.43	914	Y
																884	0.95489	X - Y	C - C	1	74.65	894	Y											1959	1.68554	Y - Y	C - C	1	51.38	915	Y
																945	0.435327	X - Y	C - C	1	86.97	896	Y											1975	0.188551	Y - Y	C - C	1	103.68	916	Y
																947	0.659246	X - Y	C - C	1	99.45	897	Y											1977	0.484461	Y - Y	C - C	1	55.01	918	Y
																975	1.42333	X - Y	C - C	1	51.04	899	Y											1984	0.584964	Y - Y	C - C	1	99.04	920	Y
																1028	0.652829	X - Y	C - C	1	55.76	901	Y											1985	0.570099	Y - Y	C - C	1	86.77	922	Y
																1053	0.394553	X - Y	C - C	1	55.28	902	Y											1987	0.522524	Y - Y	C - C	1	86.7	923	Y
																1209	1.07702	X - Y	C - C	1	58.24	903	Y											2068	0.148553	Y - Y	C - C	1	57.51	924	Y
																1257	0.15098	X - Y	C - C	1	100.19	904	Y											2077	0.263989	Y - Y	C - C	1	60.65	926	Y
																1262	0.140446	X - Y	C - C	1	80.45	905	Y											2087	0.328113	Y - Y	C - C	1	57.85	928	Y
																1336	0.132666	X - Y	C - C	1	51.54	907	Y											2145	1.40866	Y - Y	C - C	1	51.07	929	Y
																1346	0.881108	X - Y	C - C	1	56.7	908	Y											2146	0.9192	Y - Y	C - C	1	66.83	930	Y
																1377	0.24229	X - Y	C - C	1	58.42	910	Y											2201	0.77315	Y - Y	C - C	1	59.16	931	Y
																1479	0.439943	X - Y	C - C	1	57.92	911	Y											2228	0.324267	Y - Y	C - C	1	50.05	933	Y
																1495	0.119904	X - Y	C - C	1	60.25	912	Y											1507	0.239277	I - X	C - I	1	60.04	934	Y
																1505	0.536616	X - Y	C - C	1	51.17	913	Y											1646	1.66217	I - X	C - I	1	51.28	937	Y
																1545	0.341985	X - Y	C - C	1	50.87	914	Y											194	0.183262	I - Y	C - I	1	52.25	938	Y
																1566	0.116042	X - Y	C - C	1	52.77	915	Y											195	0.101956	I - Y	C - I	1	100.34	939	Y
																1586	0.342562	X - Y	C - C	1	50.89	916	Y											390	0.164133	I - Y	C - I	1	104.65	940	Y
																1598	0.85137	X - Y	C - C	1	53.62	917	Y											629	0.149778	I - Y	C - I	1	57.99	942	Y
																1630	0.331655	X - Y	C - C	1	50.33	919	Y											1196	0.717231	I - Y	C - I	1	99.08	943	Y
																1640	0.601776	X - Y	C - C	1	50.66	920	Y											1314	0.484625	I - Y	C - I	1	58.95	945	Y
																1643	0.162351	X - Y	C - C	1	50.35	921	Y											1334	0.653324	I - Y	C - I	1	51.5	946	Y
																1663	0.522106	X - Y	C - C	1	50.56	922	Y											1372	0.980017	I - Y	C - I	1	102.46	947	Y
																1674	0.487101	X - Y	C - C	1	54.41	923	Y											1406	0.778521	I - Y	C - I	1	50	948	Y
																1736	0.312539	X - Y	C - C	1	50.02	924	Y											1437	0.837945	I - Y	C - I	1	53.03	950	Y
																1884	0.236006	X - Y	C - C	1	102.14	925	Y											1535	0.772946	I - Y	C - I	1	103.74	951	Y
																1891	0.139093	X - Y	C - C	1	100.19	926	Y											1576	0.152877	I - Y	C - I	1	82.03	953	Y
																1920	0.301319	X - Y	C - C	1	60.06	928	Y											1584	0.647693	I - Y	C - I	1	51.03	954	Y
																1947	0.239277	X - Y	C - C	1	60.04	929	Y											1613	0.115541	I - Y	C - I	1	102.04	955	Y
																1966	0.57387	X - Y	C - C	1	100.38	931	Y											1633	0.330358	I - Y	C - I	1	54.78	956	Y
																1969	0.474755	X - Y	C - C	1	100.32	932	Y											1664	0.183103	I - Y	C - I	1	90.34	958	Y
																2083	0.137244	X - Y	C - C	1	104.95	934	Y											1665	0.734777	I - Y	C - I	1	91.24	959	Y
																2096	0.160793	X - Y	C - C	1	57.03	935	Y											1700	0.264567	I - Y	C - I	1	87.96	962	Y
																2138	0.796628	X - Y	C - C	1	51.26	936	Y											1752	1.76321	I - Y	C - I	1	50.33	963	Y
																2160	0.485285	X - Y	C - C	1	52.47	937	Y											1834	1.75506	I - Y	C - I	1	55.64	965	Y
																2168	0.758233	X - Y	C - C	1	50.11	938	Y											1872	0.153345	I - Y	C - I	1	60.07	966	Y
																2206	0.971054	X - Y	C - C	1	50.07	941	Y											1884	0.283266	I - Y	C - I	1	52.07	969	Y
																2263	0.658783	X - Y	C - C	1	61.97	942	Y											1976	0.509764	I - Y	C - I	1	98.28	970	Y
																2289	0.367231	X - Y	C - C	1	51.6	943	Y											1994	0.8514	I - Y	C - I	1	56.51	973	Y
																2383	0.234832	X - Y	C - C	1	54.55	946	Y											2032	0.493251	I - Y	C - I	1	81.46	975	Y
																2392	0.653922	X - Y	C - C	1	53.02	947	Y											2128	0.138695	I - Y	C - I	1	76.75	976	Y
																2530	0.351082	X - Y	C - C	1	50.54	949	Y											2184	0.788609	I - Y	C - I	1	50.57	977	Y
																2535	0.634812	X - Y	C - C	1	51.88	950	Y											2186	0.357235	I - Y	C - I	1	99.31	979	Y
																2592	1.21186	X - Y	C - C	1	52.79	951	Y											2195	0.431562	I - Y	C - I	1	50.31	982	Y
																2624	0.319135	X - Y	C - C	1	54.53	952	Y											152	0.743189	U - X	C - U	1	51.19	983	Y
																2631	0.079502	X - Y	C - C	1	54.47	953	Y											464	0.206451	U - X	C - U	1	58.15	986	Y
																2661	0.484187	X - Y	C - C	1	56.79	954	Y											851	0.086802	U - X	C - U	1	53.53	987	Y
																2677	1.20034	X - Y	C - C	1	100.67	956	Y											931	0.374754	U - X	C - U	1	55.22	988	Y
																2693	0.264942	X - Y	C - C	1	103.8	958	Y											2168	1.39694	U - X	C - U	1	52.81	989	Y
																2709	0.611366	X - Y	C - C	1	52.5	959	Y											2190	0.045799	U - X	C - U	1	50.23	990	Y
																2741	0.181871	X - Y	C - C	1	82.23	960	Y											399	0.423431	U - Y	C - U	1	55.36	992	Y
																2763	0.89295	X - Y	C - C	1	52.73	961	Y											1860	0.164366	X - U	C - U	1	97.66	993	Y
																2778	0.961149	X - Y	C - C	1	70.56	962	Y											1005	0.148452	I - I	I - I	1	80.46	994	Y
																2796	0.182943	X - Y	C - C	1	53.47	963	Y											1925	1.52704	I - I	I - I	1	53.85	995	Y
																2798	0.895172	X - Y	C - C	1	51.33	964	Y											2271	0.183382	<Null>	C - C	2	137.93	997	Y
																2802	0.771206	X - Y	C - C	1	55.14	965	Y											2272	0.886615	<Null>	C - C	2	140.81	1001	Y
																2909	0.182811	X - Y	C - C	1	50.13	966	Y											2273	0.965293	<Null>	C - C	2	142.63	1003	Y
																2930	1.08169	X - Y	C - C	1	51.15	967	Y											2275	0.539314	<Null>	C - C	2	138.48	1004	Y
																2958	0.35238	X - Y	C - C	1	51.64	968	Y											2280	0.353184	<Null>	C - C	2	126.2	1005	Y
																2961	0.21265	X - Y	C - C	1	51.66	969	Y											40	0.356277	X - X	C - C	2	132	1006	Y
																77	0.864194	Y - Y	C - C	1	64.93	970	Y											44	0.70585	X - X	C - C	2	142.93	1007	Y
																134	0.320919	Y - Y	C - C	1	95.86	971	Y											47	0.323977	X - X	C - C	2	138.92	1008	Y
																143	0.225671	Y - Y	C - C	1	51.33	972	Y											63	0.740415	X - X	C - C	2	146.41	1018	Y
																227	0.334258	Y - Y	C - C	1	50.79	974	Y											69	0.936544	X - X	C - C	2	137.42	1020	Y
																229	0.183262	Y - Y	C - C	1	52.25	975	Y											88	0.331833	X - X	C - C	2	140.13	1021	Y
																231	0.101956	Y - Y	C - C	1	100.34	979	Y											92	0.7104	X - X	C - C	2	137.93	1022	Y
																243	0.428501	Y - Y	C - C	1	90.44	982	Y											108	0.615316	X - X	C - C	2	139.94	1023	Y
																253	0.353641	Y - Y	C - C	1	52.09	983	Y											123	0.540177	X - X	C - C	2	137.82	1024	Y
																262	0.729801	Y - Y	C - C	1	50.27	984	Y											128	0.329577	X - X	C - C	2	141.26	1026	Y
																283	0.125531	Y - Y	C - C	1	64.93	985	Y											140	0.488865	X - X	C - C	2	136.38	1027	Y
																294	0.302194	Y - Y	C - C	1	98.47	986	Y											153	0.48856	X - X	C - C	2	124.8	1028	Y
																309	0.675458	Y - Y	C - C	1	62.92	987	Y											161	0.408297	X - X	C - C	2	146.1	1030	Y
																319	0.717338	Y - Y	C - C	1	50.08	988	Y											163	0.562482	X - X	C - C	2	126.09	1031	Y
																365	0.872456	Y - Y	C - C	1	54.99	993	Y											168	0.162993	X - X	C - C	2	141.98	1032	Y
																371	0.293383	Y - Y	C - C	1	58.41	996	Y											188	0.466035	X - X	C - C	2	141.97	1036	Y
																376	0.279129	Y - Y	C - C	1	55.45	998	Y											209	0.330121	X - X	C - C	2	143.28	1037	Y
																393	0.578879	Y - Y	C - C	1	62.03	1001	Y											227	0.163433	X - X	C - C	2	132.45	1039	Y
																431	1.22491	Y - Y	C - C	1	52.7	1004	Y											242	0.314514	X - X	C - C	2	135.35	1040	Y
																454	1.02787	Y - Y	C - C	1	83.58	1005	Y											256	0.883859	X - X	C - C	2	143.43	1041	Y
																464	0.146008	Y - Y	C - C	1	72.05	1006	Y											292	0.496781	X - X	C - C	2	126.76	1042	Y
[truncated: 1,570 more rows]

## Sheet: Int5_minor faults
	Full network					Fault network					Fracture network					Full network: branchs						Full network: nodes			Fault network: branches						Fault network: nodes			Fracture network: branches						fracture network: nodes
[truncated: 7,060 more rows]

[truncated: 1 more sheets: Int4_faulted]
