# Supplementary material for: The growth of faults and fracture networks in a mechanically evolving, mechanically stratified rock mass: a case study from Spireslack Surface Coal Mine, Scotland
Source: Copernicus journal article supplement (doi:10.5194/se-11-2119-2020), 2020-11-18
Supplement: Supplementary file [file se-11-2119-2020-supplement-title-page.pdf › se-11-2119-2020-supplement-title-page.pdf]

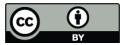

## *Supplement of*

# **The growth of faults and fracture networks in a mechanically evolving, mechanically stratified rock mass: a case study from Spireslack Surface Coal Mine, Scotland**

**Billy James Andrews et al.**

*Correspondence to:* Billy James Andrews ([billy.andrews@strath.ac.uk](mailto:billy.andrews@strath.ac.uk))

- [se-11-2119-2020-supplement-title-page.pdf](#)
- [se-2019-202-supplement\\_Resubmit](#)
  - Andrews\_Supplementary
    - \* [Sup 1\\_Joint data.stnt](#)
    - \* [Sup 2\\_Dip slope topology.xlsx](#)
    - \* [Supplementary 3\\_ Spireslack.pdf](#)

The copyright of individual parts of the supplement might differ from the CC BY 4.0 License.
